# Supplementary material
Source: MDPI journal article supplement (https://www.mdpi.com/2306-5729/4/2/61)
Supplement: s1 [file s1]

SVDS#	SPECIES	AUTHORITY	INFRASPECIFIC	SYNONYM	FAMILY	D/P	SOURCE#	COUNTRY/REGION	L (mm)	W (mm)	T (mm)	EQUATION	VOLUME (mm3)	UPDATE#
1	Abrus precatorius	L.			Fabaceae		1	US (continental)	6	4	4	1	50.26548246	0
2	Abrus precatorius	L.			Fabaceae		1	US (continental)	8	5	5	1	104.7197551	0
3	Acacia angustissima	(P. Miller) O. Kuntze	var. hirta		Fabaceae		1	US (continental)	4.5	3.5	1	1	8.246680716	0
4	Acacia angustissima	(P. Miller) O. Kuntze	var. hirta		Fabaceae		1	US (continental)	5	5	2	1	26.17993878	0
5	Acacia cyclops	A. Cunningham ex G. Don			Fabaceae		1	US (continental)	5	3	2	1	15.70796327	0
6	Acacia cyclops	A. Cunningham ex G. Don			Fabaceae		1	US (continental)	6	4	2.5	1	31.41592654	0
7	Acacia decurrens	(Wendland) Willdenow			Fabaceae		1	US (continental)	3.5	2.5	1.7	1	7.788531787	0
8	Acacia decurrens	(Wendland) Willdenow			Fabaceae		1	US (continental)	5	3	2	1	15.70796327	0
9	Acacia farnesiana	(L.) Willdenow			Fabaceae		1	US (continental)	7	6	3	1	65.97344573	0
10	Acacia farnesiana	(L.) Willdenow			Fabaceae		1	US (continental)	8.5	7.5	5	1	166.8971097	0
11	Acacia toruosa	(L.) Willdenow			Fabaceae		1	US (continental)	7	4	3	1	43.98229715	0
12	Acacia toruosa	(L.) Willdenow			Fabaceae		1	US (continental)	10	5	4	1	104.7197551	0
13	Adenanthera pavonina	L.			Fabaceae		1	US (continental)	9	9	6	1	254.4690049	0
14	Adenanthera pavonina	L.			Fabaceae		1	US (continental)	10	10	6.5	1	340.3392041	0
15	Adesmia incana	Vogel			Fabaceae		1	US (continental)	2	2	1.9	1	3.979350695	0
16	Adesmia incana	Vogel			Fabaceae		1	US (continental)	2.5	2.5	2.1	1	6.87223393	0
17	Aeschynomene indica	L.			Fabaceae		1	US (continental)	3.2	2	1.5	1	5.026548246	0
18	Aeschynomene indica	L.			Fabaceae		1	US (continental)	4	2.5	1.8	1	9.424777961	0
19	Afzelia quanzensis	Welwitsch			Fabaceae		1	US (continental)	25	11	9	1	1295.90697	0
20	Afzelia quanzensis	Welwitsch			Fabaceae		1	US (continental)	30	16	12	1	3015.928947	0
21	Albizia julibrissin	Durazzini			Fabaceae		1	US (continental)	6.5	4	2	1	27.22713633	0
22	Albizia julibrissin	Durazzini			Fabaceae		1	US (continental)	7.5	5	2	1	39.26990817	0
23	Albizia lebbeck	(L.) Bentham			Fabaceae		1	US (continental)	7	6	2	1	43.98229715	0
24	Albizia lebbeck	(L.) Bentham			Fabaceae		1	US (continental)	10	7	2	1	73.30382858	0
25	Alhagi maurorum	Medikus	maurorum		Fabaceae		1	US (continental)	2.5	1.9	1	1	2.487094184	0
26	Alhagi maurorum	Medikus	maurorum		Fabaceae		1	US (continental)	3	2.3	1	1	3.612831552	0
27	Alysicarpus vaginalis	(L.) de Candolle			Fabaceae		1	US (continental)	1.5	1	1	1	0.785398163	0
28	Alysicarpus vaginalis	(L.) de Candolle			Fabaceae		1	US (continental)	2	1.5	1.2	1	1.884955592	0
29	Amorpha canescens	Pursh			Fabaceae		1	US (continental)	2	1	0.8	1	0.837758041	0
30	Amorpha canescens	Pursh			Fabaceae		1	US (continental)	2.7	1.5	1	1	2.120575041	0
31	Amorpha fruticosa	L.			Fabaceae		1	US (continental)	3.5	1.1	1	1	2.015855286	0
32	Amorpha fruticosa	L.			Fabaceae		1	US (continental)	4	1.5	1	1	3.141592654	0
33	Amphicarpaea bracteata	(L.) Fernald			Fabaceae		1	US (continental)	2.4	2.3	1.8	1	5.202477434	0
34	Amphicarpaea bracteata	(L.) Fernald			Fabaceae		1	US (continental)	3.2	2.7	2	1	9.047786842	0
35	Andira inermis	(W. Wright) Kunth			Fabaceae		1	US (continental)	40	30	30	1	18849.55592	0
36	Anthyllis vulneraria	L.			Fabaceae		1	US (continental)	2	1.5	1	1	1.570796327	0
37	Anthyllis vulneraria	L.			Fabaceae		1	US (continental)	5	1.7	1	1	4.450589593	0
38	Apios americana	Medikus			Fabaceae		1	US (continental)	5	4	3	1	31.41592654	0
39	Apios americana	Medikus			Fabaceae		1	US (continental)	5.5	5	4	1	57.59586532	0
40	Arachis hypogaea	L.			Fabaceae		1	US (continental)	10	5	5	1	130.8996939	0
41	Arachis hypogaea	L.			Fabaceae		1	US (continental)	35	15	15	1	4123.340358	0
42	Astragalus canadensis	L.			Fabaceae		1	US (continental)	1.7	1.5	1	1	1.335176878	0
43	Astragalus canadensis	L.			Fabaceae		1	US (continental)	2	1.8	1	1	1.884955592	0
44	Astragalus crassicarpus	Nuttall	crassicarpus		Fabaceae		1	US (continental)	5.5	5	1	1	14.39896633	0
45	Astragalus crassicarpus	Nuttall	crassicarpus		Fabaceae		1	US (continental)	6.5	6.5	1	1	22.12204827	0
46	Astragalus drummondii	Douglas ex Hooker			Fabaceae		1	US (continental)	2.5	1.5	0.5	1	0.981747704	0
47	Astragalus drummondii	Douglas ex Hooker			Fabaceae		1	US (continental)	3.5	2	0.5	1	1.832595715	0
48	Astragalus purshii	Douglas ex Hooker			Fabaceae		1	US (continental)	2.2	2	1	1	2.303834613	0
49	Astragalus purshii	Douglas ex Hooker			Fabaceae		1	US (continental)	2.8	2.3	1	1	3.371976115	0
50	Baptisia australis	(L.) R. Brown			Fabaceae		1	US (continental)	4	2.5	2	1	10.47197551	0
51	Baptisia australis	(L.) R. Brown			Fabaceae		1	US (continental)	5	3.2	2	1	16.75516082	0
52	Bauhinia monarda	Kurz			Fabaceae		1	US (continental)	10	9	3	1	141.3716694	0
53	Bauhinia monarda	Kurz			Fabaceae		1	US (continental)	13	12	4	1	326.725636	0
54	Bauhinia tomentosa	L.			Fabaceae		1	US (continental)	7	5.5	2	1	40.31710572	0
55	Bauhinia tomentosa	L.			Fabaceae		1	US (continental)	8.5	7	3	1	93.46238144	0
56	Bossiaea heterophylla	Ventenat			Fabaceae		1	US (continental)	3	2.2	2	1	6.911503838	0
57	Bossiaea heterophylla	Ventenat			Fabaceae		1	US (continental)	3.5	2.5	2	1	9.162978573	0
58	Brongniartia minutiflora	S. Watson			Fabaceae		1	US (continental)	8	7	2.5	1	73.30382858	0
59	Caesalpinia bonduc	(L.) Roxburgh			Fabaceae		1	US (continental)	23	20	15	1	3612.831552	0
60	Caesalpinia bonduc	(L.) Roxburgh			Fabaceae		1	US (continental)	25	22	18	1	5183.627878	0
61	Caesalpinia coriacea	(Jacquin) Willdenow			Fabaceae		1	US (continental)	5	3	1.5	1	11.78097245	0
62	Caesalpinia coriacea	(Jacquin) Willdenow			Fabaceae		1	US (continental)	6	4	1.5	1	18.84955592	0
63	Caesalpinia gilliesii	(Wallich ex W. J. Hooker) A. Dietrich			Fabaceae		1	US (continental)	11	10	2	1	115.1917306	0
64	Caesalpinia gilliesii	(Wallich ex W. J. Hooker) A. Dietrich			Fabaceae		1	US (continental)	14	13	3	1	285.8849315	0
65	Caesalpinia pulcherrima	(L.), Swartz			Fabaceae		1	US (continental)	13	10	7	1	476.4748858	0
66	Caesalpinia pulcherrima	(L.), Swartz			Fabaceae		1	US (continental)	13	12	7	1	571.769863	0
67	Caesalpinia sappan	L.			Fabaceae		1	US (continental)	15	9	5	1	353.4291735	0
68	Caesalpinia sappan	L.			Fabaceae		1	US (continental)	18	10	8	1	753.9822369	0
69	Cajanus cajan	(L.) Huth			Fabaceae		1	US (continental)	7	7	6	1	153.93804	0
70	Cajanus cajan	(L.) Huth			Fabaceae		1	US (continental)	10	9	7	1	329.8672286	0
71	Calliandra eriophylla	Bentham			Fabaceae		1	US (continental)	5.5	3	2	1	17.27875959	0
72	Calliandra eriophylla	Bentham			Fabaceae		1	US (continental)	7.5	4	3	1	47.1238898	0
73	Calliandra humilis	Bentham			Fabaceae		1	US (continental)	5	3	1.5	1	11.78097245	0
74	Calliandra humilis	Bentham			Fabaceae		1	US (continental)	6	4	2	1	25.13274123	0
75	Canavalia ensiformis	(L.) de Candolle			Fabaceae		1	US (continental)	14	12	7	1	615.7521601	0
76	Canavalia ensiformis	(L.) de Candolle			Fabaceae		1	US (continental)	22	16	10	1	1843.06769	0
77	Caragana arborescens	Lamarck			Fabaceae		1	US (continental)	3.5	2.5	2.5	1	11.45372322	0
78	Caragana arborescens	Lamarck			Fabaceae		1	US (continental)	4.5	3.2	3.2	1	24.12743158	0
79	Carmichaelia arenaria	G. Simpson			Fabaceae		1	US (continental)	2	1.5	1	1	1.570796327	0
80	Carmichaelia arenaria	G. Simpson			Fabaceae		1	US (continental)	2.5	1.5	1	1	1.963495408	0
81	Cassia fistula	L.			Fabaceae		1	US (continental)	15	8	3	1	188.4955592	0
82	Cassia fistula	L.			Fabaceae		1	US (continental)	17	10	3.5	1	311.5412715	0
83	Cassia javanica	L.			Fabaceae		1	US (continental)	7	6	3	1	65.97344573	0
84	Cassia javanica	L.			Fabaceae		1	US (continental)	7.5	7	4	1	109.9557429	0
85	Centrosema virginiana	(L.) Bentham			Fabaceae		1	US (continental)	3.5	2	2	1	7.330382858	0
86	Centrosema virginiana	(L.) Bentham			Fabaceae		1	US (continental)	4.2	2.5	2	1	10.99557429	0
87	Ceratonia siliqua	L.			Fabaceae		1	US (continental)	8	6	4	1	100.5309649	0
88	Ceratonia siliqua	L.			Fabaceae		1	US (continental)	9	7	4	1	131.9468915	0
89	Cercis canadensis	L.			Fabaceae		1	US (continental)	5	3.5	2	1	18.32595715	0
90	Cercis canadensis	L.			Fabaceae		1	US (continental)	6.5	4.3	2	1	29.26917156	0
91	Chamaecrista absus	(L.) Irwin & Barneby			Fabaceae		1	US (continental)	4	3.5	2	1	14.66076572	0
92	Chamaecrista absus	(L.) Irwin & Barneby			Fabaceae		1	US (continental)	5	4.5	2	1	23.5619449	0
93	Chamaecrista fasciculata	(Michaux) Greene			Fabaceae		1	US (continental)	3.3	2.7	1	1	4.665265091	0
94	Chamaecrista fasciculata	(Michaux) Greene			Fabaceae		1	US (continental)	4	4	1	1	8.37758041	0
95	Chamaecrista nictitans	(L.) Moench			Fabaceae		1	US (continental)	3	2	1	1	3.141592654	0
96	Chamaecrista nictitans	(L.) Moench			Fabaceae		1	US (continental)	3.3	2.5	1	1	4.319689899	0
97	Chapmannia floridana	Torres & Gray			Fabaceae		1	US (continental)	3.5	2	2	1	7.330382858	0
98	Chapmannia floridana	Torres & Gray			Fabaceae		1	US (continental)	5.5	3	2.5	1	21.59844949	0
99	Cicer arietinum	L.			Fabaceae		1	US (continental)	6	5	4	1	62.83185307	0
100	Cicer arietinum	L.			Fabaceae		1	US (continental)	15	9	7	1	494.8008429	0
101	Cladratis lutea	(Michaux) Koch			Fabaceae		1	US (continental)	6	3	1.5	1	14.13716694	0
102	Cladratis lutea	(Michaux) Koch			Fabaceae		1	US (continental)	7	3.5	2	1	25.65634	0
103	Clitoria ternatea	L.			Fabaceae		1	US (continental)	6	5	1.5	1	23.5619449	0
104	Clitoria ternatea	L.			Fabaceae		1	US (continental)	7	5	2	1	36.65191429	0
105	Cologania angustifolia	Kunth			Fabaceae		1	US (continental)	2.5	2.5	2	1	6.544984695	0
106	Cologania angustifolia	Kunth			Fabaceae		1	US (continental)	3	3	3	1	14.13716694	0
107	Colutea arborescens	L.			Fabaceae		1	US (continental)	4.2	4	2	1	17.59291886	0
108	Colutea arborescens	L.			Fabaceae		1	US (continental)	4.7	4.2	2	1	20.67167966	0
109	Coronilla varia	L.			Fabaceae		1	US (continental)	2.2	2	1	1	2.303834613	0
110	Coronilla varia	L.			Fabaceae		1	US (continental)	4	2	1.5	1	6.283185307	0
111	Coursetia microphylla	A. Gray			Fabaceae		1	US (continental)	3.5	3	2	1	10.99557429	0
112	Coursetia microphylla	A. Gray			Fabaceae		1	US (continental)	5	4	2	1	20.94395102	0
113	Cracca caribaea	(Jacquin) Bentham			Fabaceae		1	US (continental)	2	1.8	1	1	1.884955592	0
114	Cracca caribaea	(Jacquin) Bentham			Fabaceae		1	US (continental)	3	2.3	1	1	3.612831552	0
115	Crotalaria pallida	Aiton			Fabaceae		1	US (continental)	3	2.2	2	1	6.911503838	0
116	Crotalaria pallida	Aiton			Fabaceae		1	US (continental)	3.5	2.5	2	1	9.162978573	0
117	Crotalaria sagittalis	L.			Fabaceae		1	US (continental)	2	2	1	1	2.094395102	0
118	Crotalaria sagittalis	L.			Fabaceae		1	US (continental)	2.5	2.2	1	1	2.879793266	0
119	Crotalaria spectabilis	Roth			Fabaceae		1	US (continental)	4.8	3.4	2	1	17.09026404	0
120	Crotalaria spectabilis	Roth			Fabaceae		1	US (continental)	5	3.7	2	1	19.3731547	0
121	Cyamopsis tetragonoloba	(L.) Taubert			Fabaceae		1	US (continental)	5	4.3	2.8	1	31.52064629	0
122	Cyamopsis tetragonoloba	(L.) Taubert			Fabaceae		1	US (continental)	5.3	4.7	3	1	39.1285365	0
123	Cytisus scoparius	(L.) Link			Fabaceae		1	US (continental)	3	2	2	1	6.283185307	0
124	Cytisus scoparius	(L.) Link			Fabaceae		1	US (continental)	4	2.7	2	1	11.30973355	0
125	Dalbergia sissoo	Roxburg ex de Candolle			Fabaceae		1	US (continental)	7.5	5	2	1	39.26990817	0
126	Dalbergia sissoo	Roxburg ex de Candolle			Fabaceae		1	US (continental)	8.2	5.2	2	1	44.65250358	0
127	Dalea leporina	(Aiton) A. A. Bullock			Fabaceae		1	US (continental)	1.5	1.5	1	1	1.178097245	0
128	Dalea leporina	(Aiton) A. A. Bullock			Fabaceae		1	US (continental)	1.8	1.6	1	1	1.507964474	0
129	Dalea purpurea	Ventenat			Fabaceae		1	US (continental)	1.6	1.3	1	1	1.089085453	0
130	Dalea purpurea	Ventenat			Fabaceae		1	US (continental)	2	1.8	1.5	1	2.827433388	0
131	Daviesia horrida	Meissner			Fabaceae		1	US (continental)	4.2	2.4	2	1	10.55575132	0
132	Daviesia horrida	Meissner			Fabaceae		1	US (continental)	4.5	2.8	2	1	13.19468915	0
133	Delonix regia	(Bojer ex Hooker) Rafinesque			Fabaceae		1	US (continental)	19	6	5	1	298.4513021	0
134	Delonix regia	(Bojer ex Hooker) Rafinesque			Fabaceae		1	US (continental)	21	7.5	5	1	412.3340358	0
135	Desmanthus illinoensis	(Michaux), Macmillian ex Robinson & Fernald			Fabaceae		1	US (continental)	3.8	2.5	1	1	4.974188368	0
136	Desmanthus illinoensis	(Michaux), Macmillian ex Robinson & Fernald			Fabaceae		1	US (continental)	5	3	1	1	7.853981634	0
137	Desmanthus leptolobus	Torres & Gray			Fabaceae		1	US (continental)	3.5	1.7	1	1	3.115412715	0
138	Desmanthus leptolobus	Torres & Gray			Fabaceae		1	US (continental)	4	2.3	1.5	1	7.225663103	0
139	Desmodium canadense	(L.) de Candolle			Fabaceae		1	US (continental)	2.8	2	1	1	2.932153143	0
140	Desmodium canadense	(L.) de Candolle			Fabaceae		1	US (continental)	3.5	2.2	1	1	4.031710572	0
141	Demondium glutinosum	(Muhlenberg ex Willdenow) Wood			Fabaceae		1	US (continental)	7	4	1	1	14.66076572	0
142	Demondium glutinosum	(Muhlenberg ex Willdenow) Wood			Fabaceae		1	US (continental)	8.5	5	1	1	22.25294796	0
143	Desmodium tortuosum	(Swartz) de Candolle			Fabaceae		1	US (continental)	2.3	1.7	1	1	2.047271213	0
144	Desmodium tortuosum	(Swartz) de Candolle			Fabaceae		1	US (continental)	2.7	2	1	1	2.827433388	0
145	Dichrostachys cinerea	(L.) Wight & Arnott			Fabaceae		1	US (continental)	4	3.5	2	1	14.66076572	0
146	Dichrostachys cinerea	(L.) Wight & Arnott			Fabaceae		1	US (continental)	6	5	2	1	31.41592654	0
147	Diocleinae multiflora	(Torres & Gray) C. Mohr			Fabaceae		1	US (continental)	6.8	5	5	1	89.01179185	0
148	Diocleinae multiflora	(Torres & Gray) C. Mohr			Fabaceae		1	US (continental)	7.5	7	5.5	1	151.1891465	0
149	Diocleinae reflexa	Hooker f.			Fabaceae		1	US (continental)	25	20	13	1	3403.392041	0
150	Diocleinae reflexa	Hooker f.			Fabaceae		1	US (continental)	33	27	18	1	8397.477163	0
151	Diphysa thurberi	(A. Gray) Rydberg			Fabaceae		1	US (continental)	6.5	4.5	3	1	45.94579256	0
152	Diphysa thurberi	(A. Gray) Rydberg			Fabaceae		1	US (continental)	7	4.5	3	1	49.48008429	0
153	Dipteryx odorata	(Aublet) Willdenow			Fabaceae		1	US (continental)	40	13	8	1	2178.170906	0
154	Dipteryx odorata	(Aublet) Willdenow			Fabaceae		1	US (continental)	50	15	10	1	3926.990817	0
155	Entada gigas	(L.) Fawcett & Rendle			Fabaceae		1	US (continental)	45	44	15	1	15550.88364	0
156	Entada gigas	(L.) Fawcett & Rendle			Fabaceae		1	US (continental)	80	70	20	1	58643.06287	0
157	Enterolobium cyclocarpum	(Jacquin) Grisebach			Fabaceae		1	US (continental)	20	15	8	1	1256.637061	0
158	Errazurizia rotunda	(Wooton) Barneby			Fabaceae		1	US (continental)	4.6	2.7	2	1	13.00619359	0
159	Errazurizia rotunda	(Wooton) Barneby			Fabaceae		1	US (continental)	7	3.7	2.5	1	33.90302072	0
160	Erythrina crista-galli	L.			Fabaceae		1	US (continental)	11	7	6	1	241.9026343	0
161	Erythrina crista-galli	L.			Fabaceae		1	US (continental)	15	8	7	1	439.8229715	0
162	Erythrina herbacea	L.			Fabaceae		1	US (continental)	10	6	6	1	188.4955592	0
163	Erythrina herbacea	L.			Fabaceae		1	US (continental)	11	7	7	1	282.21974	0
164	Euchresta japonica	Hooker f. ex Regel			Fabaceae		1	US (continental)	15	9	6	1	424.1150082	0
165	Euchresta japonica	Hooker f. ex Regel			Fabaceae		1	US (continental)	18	10	7	1	659.7344573	0
166	Eysenhardtia texana	Scheele			Fabaceae		1	US (continental)	3	1.3	1	1	2.042035225	0
167	Eysenhardtia texana	Scheele			Fabaceae		1	US (continental)	4	1.5	1	1	3.141592654	0
168	Galactia volubilis	(L.) Britton			Fabaceae		1	US (continental)	3.5	2.5	2	1	9.162978573	0
169	Galactia volubilis	(L.) Britton			Fabaceae		1	US (continental)	4.3	3	2	1	13.50884841	0
170	Galega officinalis	L.			Fabaceae		1	US (continental)	3.5	1.5	1.5	1	4.123340358	0
171	Galega officinalis	L.			Fabaceae		1	US (continental)	4.5	2	1.5	1	7.068583471	0
172	Genista tinctoria	L.			Fabaceae		1	US (continental)	2	2	1	1	2.094395102	0
173	Genista tinctoria	L.			Fabaceae		1	US (continental)	3	2.5	1	1	3.926990817	0
174	Genistidium dumosum	I. M. Johnston			Fabaceae		1	US (continental)	4.2	3.5	2	1	15.393804	0
175	Gleditsia aquatica	Marshall			Fabaceae		1	US (continental)	10	9	3	1	141.3716694	0
176	Gleditsia aquatica	Marshall			Fabaceae		1	US (continental)	12	11	3	1	207.3451151	0
177	Gleditsia triacanthos	L.			Fabaceae		1	US (continental)	9	6.5	5	1	153.1526419	0
178	Gleditsia triacanthos	L.			Fabaceae		1	US (continental)	10	7	5	1	183.2595715	0
179	Glottidium vesicaria	(Jacquin) C. Mohr			Fabaceae		1	US (continental)	11	5.5	5	1	158.3886296	0
180	Glottidium vesicaria	(Jacquin) C. Mohr			Fabaceae		1	US (continental)	12	6.5	6	1	245.044227	0
181	Glycine max	(L.) Merrill			Fabaceae		1	US (continental)	4	3	3	1	18.84955592	0
182	Glycine max	(L.) Merrill			Fabaceae		1	US (continental)	9	8	7	1	263.8937829	0
183	Glycyrrhiza lepidota	(Nuttall) Pursh			Fabaceae		1	US (continental)	2.5	2	2	1	5.235987756	0
184	Glycyrrhiza lepidota	(Nuttall) Pursh			Fabaceae		1	US (continental)	3.5	2.5	2	1	9.162978573	0
185	Gymnocladus dioica	(L.) Koch			Fabaceae		1	US (continental)	15	14	10	1	1099.557429	0
186	Gymnocladus dioica	(L.) Koch			Fabaceae		1	US (continental)	18	15	12	1	1696.460033	0
187	Haematoxylum campechianum	L.			Fabaceae		1	US (continental)	8	3	1	1	12.56637061	0
188	Haematoxylum campechianum	L.			Fabaceae		1	US (continental)	12	3	1	1	18.84955592	0
189	Hedysarum alpinum	L.	americanum		Fabaceae		1	US (continental)	3.5	3	2	1	10.99557429	0
190	Hedysarum alpinum	L.	americanum		Fabaceae		1	US (continental)	4	3	2	1	12.56637061	0
191	Hoffmannseggia glauca	(Ortega) Eifert			Fabaceae		1	US (continental)	3.2	2.2	2	1	7.37227076	0
192	Hoffmannseggia glauca	(Ortega) Eifert			Fabaceae		1	US (continental)	3.7	2.5	2	1	9.686577349	0
193	Hymenaea courbaril	L.			Fabaceae		1	US (continental)	20	15	10	1	1570.796327	0
194	Hymenaea courbaril	L.			Fabaceae		1	US (continental)	30	20	15	1	4712.38898	0
195	Hypocalyptus sophorides	(Bergius) Baillon			Fabaceae		1	US (continental)	4	3	2.7	1	16.96460033	0
196	Hypocalyptus sophorides	(Bergius) Baillon			Fabaceae		1	US (continental)	4.5	3.3	3	1	23.32632545	0
197	Indigofera hirsuta	L.			Fabaceae		1	US (continental)	1.5	1.1	1.1	1	0.950331778	0
198	Indigofera hirsuta	L.			Fabaceae		1	US (continental)	1.7	1.3	1.3	1	1.504299282	0
199	Kennedia rubicunda	Ventenat			Fabaceae		1	US (continental)	4.5	3	2	1	14.13716694	0
200	Kennedia rubicunda	Ventenat			Fabaceae		1	US (continental)	5	4	2.5	1	26.17993878	0
201	Lablab purpureus	L.			Fabaceae		1	US (continental)	10	7	6	1	219.9114858	0
202	Lablab purpureus	L.			Fabaceae		1	US (continental)	13	9	7	1	428.8273972	0
203	Laburnum anagyroides	Medikus			Fabaceae		1	US (continental)	3	2.7	2.5	1	10.60287521	0
204	Laburnum anagyroides	Medikus			Fabaceae		1	US (continental)	4.5	3.7	3	1	26.15375884	0
205	Lathyrus hirsutus	L.			Fabaceae		1	US (continental)	3	3	3	1	14.13716694	0
206	Lathyrus hirsutus	L.			Fabaceae		1	US (continental)	4	3.5	3.5	1	25.65634	0
207	Lathyrus latifolius	L.			Fabaceae		1	US (continental)	3.5	2.7	2.7	1	13.35962276	0
208	Lathyrus odoratus	L.			Fabaceae		1	US (continental)	5.5	4	4	1	46.07669225	0
209	Lathyrus odoratus	L.			Fabaceae		1	US (continental)	4.5	4.5	4.5	1	47.71293843	0
210	Lathyrus odoratus	L.			Fabaceae		1	US (continental)	5.5	5	5	1	71.99483164	0
211	Lathyrus sylvestris	L.			Fabaceae		1	US (continental)	4	4	4	1	33.51032164	0
212	Lathyrus sylvestris	L.			Fabaceae		1	US (continental)	6	4.5	4.5	1	63.61725124	0
213	Lens culinaris	Medikus			Fabaceae		1	US (continental)	4	4	2	1	16.75516082	0
214	Lens culinaris	Medikus			Fabaceae		1	US (continental)	7	7	3	1	76.96902001	0
215	Lespedeza cuneata	(Dumont de Courset) G. Don			Fabaceae		1	US (continental)	1.8	1	0.8	1	0.753982237	0
216	Lespedeza cuneata	(Dumont de Courset) G. Don			Fabaceae		1	US (continental)	2.4	1.3	0.8	1	1.306902544	0
217	Lespedeza stipulacea	Maximowicz			Fabaceae		1	US (continental)	2	1.5	1	1	1.570796327	0
218	Lespedeza stipulacea	Maximowicz			Fabaceae		1	US (continental)	2.5	1.8	1	1	2.35619449	0
219	Lespedeza striata	(Thunberg) Hooker & Arnott			Fabaceae		1	US (continental)	1.7	1.2	1	1	1.068141502	0
220	Lespedeza striata	(Thunberg) Hooker & Arnott			Fabaceae		1	US (continental)	2.3	1.7	1	1	2.047271213	0
221	Lespedeza virginica	(L.) Britton			Fabaceae		1	US (continental)	1.5	1.2	1	1	0.942477796	0
222	Lespedeza virginica	(L.) Britton			Fabaceae		1	US (continental)	2.5	1.5	1	1	1.963495408	0
223	Leucaena leucocephala	(Lamarck) de Wit			Fabaceae		1	US (continental)	6	3.8	1.5	1	17.90707813	0
224	Leucaena leucocephala	(Lamarck) de Wit			Fabaceae		1	US (continental)	8	4.2	2	1	35.18583772	0
225	Lonchocarpus violaceus	Kunth			Fabaceae		1	US (continental)	10	5.5	4	1	115.1917306	0
226	Lonchocarpus violaceus	Kunth			Fabaceae		1	US (continental)	15	8.7	4.5	1	307.483381	0
227	Lotus corniculata	L.			Fabaceae		1	US (continental)	1.2	1	1	1	0.628318531	0
228	Lotus corniculata	L.			Fabaceae		1	US (continental)	1.7	1.3	1	1	1.157153294	0
229	Lotus purshianus	(Bentham) Clements & Clements			Fabaceae		1	US (continental)	2.5	1.2	1.2	1	1.884955592	0
230	Lotus purshianus	(Bentham) Clements & Clements			Fabaceae		1	US (continental)	3.5	2	2	1	7.330382858	0
231	Lotus uliginosus	Schkuhr			Fabaceae		1	US (continental)	0.8	0.7	0.7	1	0.20525072	0
232	Lotus uliginosus	Schkuhr			Fabaceae		1	US (continental)	1.1	0.9	0.9	1	0.466526509	0
233	Lupinus albus	L.			Fabaceae		1	US (continental)	9	8	5	1	188.4955592	0
234	Lupinus albus	L.			Fabaceae		1	US (continental)	12	11	6	1	414.6902303	0
235	Lupinus angustifolius	L.			Fabaceae		1	US (continental)	5	4	4	1	41.88790205	0
236	Lupinus angustifolius	L.			Fabaceae		1	US (continental)	9	6	6	1	169.6460033	0
237	Lupinus chamissonis	Eschscholtz			Fabaceae		1	US (continental)	5	3	2	1	15.70796327	0
238	Lupinus chamissonis	Eschscholtz			Fabaceae		1	US (continental)	5.7	4.5	3	1	40.29092578	0
239	Lupinus leucophyllus	Douglas ex Lindley			Fabaceae		1	US (continental)	3.5	3	2	1	10.99557429	0
240	Lupinus leucophyllus	Douglas ex Lindley			Fabaceae		1	US (continental)	5	4	3	1	31.41592654	0
241	Lupinus polyphyllus	Lindley			Fabaceae		1	US (continental)	4.5	3.5	2	1	16.49336143	0
242	Lupinus polyphyllus	Lindley			Fabaceae		1	US (continental)	5.5	4	3	1	34.55751919	0
243	Lysiloma sabicu	Bentham			Fabaceae		1	US (continental)	5.5	4	1.5	1	17.27875959	0
244	Lysiloma sabicu	Bentham			Fabaceae		1	US (continental)	9	5	1.5	1	35.34291735	0
245	Maackia amurensis	Ruprecht			Fabaceae		1	US (continental)	6.5	3.5	3	1	35.73561643	0
246	Maackia amurensis	Ruprecht			Fabaceae		1	US (continental)	9	4.5	3.5	1	74.22012644	0
247	Macroptilium lathyroides	(L.) Urban			Fabaceae		1	US (continental)	3	1.8	1.5	1	4.241150082	0
248	Macroptilium lathyroides	(L.) Urban			Fabaceae		1	US (continental)	3.5	2.3	2	1	8.429940287	0
249	Marina parryi	(Torres & Gray) Barneby			Fabaceae		1	US (continental)	1.7	1.4	1	1	1.246165086	0
250	Marina parryi	(Torres & Gray) Barneby			Fabaceae		1	US (continental)	2	1.6	1	1	1.675516082	0
251	Medicago arabica	(L.) Hudson			Fabaceae		1	US (continental)	2.5	1.3	1	1	1.701696021	0
252	Medicago arabica	(L.) Hudson			Fabaceae		1	US (continental)	3	1.6	1	1	2.513274123	0
253	Medicago lupulina	L.			Fabaceae		1	US (continental)	1.6	1.1	1	1	0.921533845	0
254	Medicago lupulina	L.			Fabaceae		1	US (continental)	1.8	1.3	1	1	1.225221135	0
255	Medicago orbicularis	(L.) Bartalini			Fabaceae		1	US (continental)	2.5	2	1.5	1	3.926990817	0
256	Medicago orbicularis	(L.) Bartalini			Fabaceae		1	US (continental)	3	3	1.5	1	7.068583471	0
257	Medicago polymorpha	(L.)			Fabaceae		1	US (continental)	2.3	1.2	0.8	1	1.156106097	0
258	Medicago polymorpha	(L.)			Fabaceae		1	US (continental)	4	2.3	1.5	1	7.225663103	0
259	Medicago sativa	L.			Fabaceae		1	US (continental)	2.3	1.3	1	1	1.565560339	0
260	Medicago sativa	L.			Fabaceae		1	US (continental)	2.6	1.5	1	1	2.042035225	0
261	Melilotus alba	Medikus			Fabaceae		1	US (continental)	1.8	1.5	1	1	1.413716694	0
262	Melilotus alba	Medikus			Fabaceae		1	US (continental)	2.5	1.7	1	1	2.225294796	0
263	Melilotus indica	(L.) Allioni			Fabaceae		1	US (continental)	1.7	1.3	1	1	1.157153294	0
264	Melilotus indica	(L.) Allioni			Fabaceae		1	US (continental)	2	1.5	1	1	1.570796327	0
265	Melilotus officinalis	Lamarck			Fabaceae		1	US (continental)	1.7	1.2	1	1	1.068141502	0
266	Melilotus officinalis	Lamarck			Fabaceae		1	US (continental)	2	1.5	1	1	1.570796327	0
267	Melilotus borealis	A. Gray			Fabaceae		1	US (continental)	5	3.8	2	1	19.89675347	0
268	Melilotus borealis	A. Gray			Fabaceae		1	US (continental)	7.5	5.2	4	1	81.68140899	0
269	Mimosa dysocarpa	Bentham			Fabaceae		1	US (continental)	3.5	2.8	1	1	5.131268001	0
270	Mimosa dysocarpa	Bentham			Fabaceae		1	US (continental)	5.5	3.8	2	1	21.88642882	0
271	Mimosa pigra	L.	berlandieri		Fabaceae		1	US (continental)	5.7	2.4	2	1	14.3256625	0
272	Mimosa pigra	L.	berlandieri		Fabaceae		1	US (continental)	7	2.5	2	1	18.32595715	0
273	Mimozyganthus carinatus	(Grisebach) Burkart			Fabaceae		1	US (continental)	5.4	5.2	1	1	14.70265362	0
274	Mimozyganthus carinatus	(Grisebach) Burkart			Fabaceae		1	US (continental)	7.5	7.3	1.8	1	51.60065934	0
275	Mucuna deeringiana	(Bortero) Merrill			Fabaceae		1	US (continental)	11	10	8	1	460.7669225	0
276	Mucuna deeringiana	(Bortero) Merrill			Fabaceae		1	US (continental)	14	12	9	1	791.6813487	0
277	Mucuna pruriens	(L.) de Candolle			Fabaceae		1	US (continental)	13	9	7	1	428.8273972	0
278	Mucuna pruriens	(L.) de Candolle			Fabaceae		1	US (continental)	18	12	8	1	904.7786842	0
279	Mucuna sloanei	Fawcett & Rendle			Fabaceae		1	US (continental)	23	23	16	1	4431.740037	0
280	Mucuna sloanei	Fawcett & Rendle			Fabaceae		1	US (continental)	33	33	20	1	11403.98133	0
281	Neptunia pubescens	Bentham			Fabaceae		1	US (continental)	4	2.7	1	1	5.654866776	0
282	Neptunia pubescens	Bentham			Fabaceae		1	US (continental)	4.5	3	1	1	7.068583471	0
283	Nissolia schottii	(Torrey) A. Gray			Fabaceae		1	US (continental)	3.5	2.2	1	1	4.031710572	0
284	Nissolia schottii	(Torrey) A. Gray			Fabaceae		1	US (continental)	4	3	1	1	6.283185307	0
285	Olneya tesota	A. Gray			Fabaceae		1	US (continental)	9	6.5	6	1	183.7831702	0
286	Olneya tesota	A. Gray			Fabaceae		1	US (continental)	10	7.5	7	1	274.8893572	0
287	Onobrychis viciifolia	Scopoli			Fabaceae		1	US (continental)	4.3	2.5	2	1	11.25737368	0
288	Onobrychis viciifolia	Scopoli			Fabaceae		1	US (continental)	4.8	3	2	1	15.07964474	0
289	Ononis spinosa	L.			Fabaceae		1	US (continental)	2.3	1.6	1.5	1	2.890265241	0
290	Ononis spinosa	L.			Fabaceae		1	US (continental)	2.7	2.1	2	1	5.937610115	0
291	Ophrestia radicosa	(A. Richards) Verdcourt			Fabaceae		1	US (continental)	4	3	2	1	12.56637061	0
292	Ophrestia radicosa	(A. Richards) Verdcourt			Fabaceae		1	US (continental)	5	3.5	2	1	18.32595715	0
293	Orbexilum pedunculatum	Rydberg			Fabaceae		1	US (continental)	2.8	2.4	2	1	7.037167544	0
294	Orbexilum pedunculatum	Rydberg			Fabaceae		1	US (continental)	3.2	2.6	2	1	8.712683626	0
295	Ornithopus sativus	Brotero			Fabaceae		1	US (continental)	1.8	1.2	1	1	1.130973355	0
296	Ornithopus sativus	Brotero			Fabaceae		1	US (continental)	2.2	1.7	1	1	1.958259421	0
297	Oxytropis campestris	(L.) de Candolle			Fabaceae		1	US (continental)	1.5	1.5	1	1	1.178097245	0
298	Oxytropis campestris	(L.) de Candolle			Fabaceae		1	US (continental)	2	1.9	1	1	1.989675347	0
299	Oxtropis sericea	Nuttall			Fabaceae		1	US (continental)	1.7	1.5	1	1	1.335176878	0
300	Oxtropis sericea	Nuttall			Fabaceae		1	US (continental)	2.2	2	1.2	1	2.764601535	0
301	Pachyrrhizus erosus	(L.) Urban			Fabaceae		1	US (continental)	7	7	5	1	128.2817	0
302	Pachyrrhizus erosus	(L.) Urban			Fabaceae		1	US (continental)	9	7.5	6	1	212.0575041	0
303	Parkia javanica	Merrill			Fabaceae		1	US (continental)	15	8	6	1	376.9911184	0
304	Parkia javanica	Merrill			Fabaceae		1	US (continental)	17	12	7	1	747.6990516	0
305	Parkinsonia aculeata	L.			Fabaceae		1	US (continental)	9	3.3	2	1	31.10176727	0
306	Parkinsonia aculeata	L.			Fabaceae		1	US (continental)	9.5	4.2	4	1	83.56636459	0
307	Parryella filifolia	Torres & Gray			Fabaceae		1	US (continental)	3.5	2	2	1	7.330382858	0
308	Parryella filifolia	Torres & Gray			Fabaceae		1	US (continental)	4.5	2.4	2	1	11.30973355	0
309	Peltophorum pterocarpum	(A. P. de Candolle) Backer ex K. Heyne			Fabaceae		1	US (continental)	10	4.5	2	1	47.1238898	0
310	Peltophorum pterocarpum	(A. P. de Candolle) Backer ex K. Heyne			Fabaceae		1	US (continental)	11	5	2	1	57.59586532	0
311	Peteria thompsonae	S. Watson			Fabaceae		1	US (continental)	5.3	3.8	2.7	1	28.47225422	0
312	Peteria thompsonae	S. Watson			Fabaceae		1	US (continental)	5.8	3.8	2.7	1	31.15831594	0
313	Phaseolus coccineus	L.			Fabaceae		1	US (continental)	12	10	6	1	376.9911184	0
314	Phaseolus coccineus	L.			Fabaceae		1	US (continental)	22	14	8	1	1290.147383	0
315	Phaseolus lunatus	L.			Fabaceae		1	US (continental)	9	7	3	1	98.96016859	0
316	Phaseolus lunatus	L.			Fabaceae		1	US (continental)	25	16	6	1	1256.637061	0
317	Phaseolus vulgaris	L.			Fabaceae		1	US (continental)	6.5	4.5	3	1	45.94579256	0
318	Phaseolus vulgaris	L.			Fabaceae		1	US (continental)	20	10	7	1	733.0382858	0
319	Pickeringia montana	Nuttall ex Torres & Gray	tomentosa		Fabaceae		1	US (continental)	3.7	2.2	1.5	1	6.39314105	0
320	Pickeringia montana	Nuttall ex Torres & Gray	tomentosa		Fabaceae		1	US (continental)	4.3	2.5	1.5	1	8.443030257	0
321	Piscidia piscipula	(L.) Sargent			Fabaceae		1	US (continental)	6	3.2	2.5	1	25.13274123	0
322	Piscidia piscipula	(L.) Sargent			Fabaceae		1	US (continental)	8	4	3	1	50.26548246	0
323	Pisum sativum	L.			Fabaceae		1	US (continental)	5	5	5	1	65.44984695	0
324	Pisum sativum	L.			Fabaceae		1	US (continental)	11	9	8	1	414.6902303	0
325	Pithecellobium dulce	(Roxburg) Bentham			Fabaceae		1	US (continental)	9	7	3	1	98.96016859	0
326	Pithecellobium dulce	(Roxburg) Bentham			Fabaceae		1	US (continental)	10	8	4	1	167.5516082	0
327	Podalyria calyptrata	(Retzius) Willdenow			Fabaceae		1	US (continental)	4.5	3.5	2	1	16.49336143	0
328	Podalyria calyptrata	(Retzius) Willdenow			Fabaceae		1	US (continental)	6	4.5	2	1	28.27433388	0
329	Pongamia pinnata	(L.) Merrill			Fabaceae		1	US (continental)	18	15	4	1	565.4866776	0
330	Pongamia pinnata	(L.) Merrill			Fabaceae		1	US (continental)	20	16	5	1	837.758041	0
331	Prosopis glandulosa	Torrey			Fabaceae		1	US (continental)	6.3	4.4	2	1	29.02831612	0
332	Prosopis glandulosa	Torrey			Fabaceae		1	US (continental)	7	4.6	3	1	50.57964172	0
333	Psoralea bituminosa	L.			Fabaceae		1	US (continental)	12	3	1	1	18.84955592	0
334	Psoralea bituminosa	L.			Fabaceae		1	US (continental)	15	3.5	2	1	54.97787144	0
335	Psoralea orbicularis	Lindley			Fabaceae		1	US (continental)	4	2.8	2	1	11.72861257	0
336	Psoralea orbicularis	Lindley			Fabaceae		1	US (continental)	5	3.2	2	1	16.75516082	0
337	Psorothamnus arborescens	(Torrey) Barney	minutifolius		Fabaceae		1	US (continental)	4.5	3.5	2	1	16.49336143	0
338	Psorothamnus arborescens	(Torrey) Barney	minutifolius		Fabaceae		1	US (continental)	5.3	4	3	1	33.30088213	0
339	Psorothamnus scoparius	(A. Gray) Rydberg			Fabaceae		1	US (continental)	2	1.5	1	1	1.570796327	0
340	Psorothamnus scoparius	(A. Gray) Rydberg			Fabaceae		1	US (continental)	2.5	1.7	1	1	2.225294796	0
341	Pueraria lobata	(Willdenow) Ohwi			Fabaceae		1	US (continental)	2.8	2	2	1	5.864306287	0
342	Pueraria lobata	(Willdenow) Ohwi			Fabaceae		1	US (continental)	4	2.7	2	1	11.30973355	0
343	Rhynchosia minima	(L.) de Candolle			Fabaceae		1	US (continental)	2.9	2.5	2	1	7.592182246	0
344	Rhynchosia minima	(L.) de Candolle			Fabaceae		1	US (continental)	3.5	2.8	2	1	10.262536	0
345	Robinia pseudoacacia	L.			Fabaceae		1	US (continental)	3.2	2.7	2	1	9.047786842	0
346	Robinia pseudoacacia	L.			Fabaceae		1	US (continental)	4.2	3	2	1	13.19468915	0
347	Schrankia uncinata	Willdenow			Fabaceae		1	US (continental)	3	2	2	1	6.283185307	0
348	Schrankia uncinata	Willdenow			Fabaceae		1	US (continental)	4.5	3.2	2	1	15.07964474	0
349	Scorpiurus muricatus	L.			Fabaceae		1	US (continental)	2.7	2	1.7	1	4.80663676	0
350	Scorpiurus muricatus	L.			Fabaceae		1	US (continental)	4.2	2	2	1	8.79645943	0
351	Senna alata	(L.) Roxburgh			Fabaceae		1	US (continental)	5.2	4.5	1.5	1	18.37831702	0
352	Senna alata	(L.) Roxburgh			Fabaceae		1	US (continental)	6.5	5.5	2	1	37.43731246	0
353	Senna didymobotrya	(Fresenius) Irwin & Barneby			Fabaceae		1	US (continental)	9	4.7	2	1	44.29645642	0
354	Senna didymobotrya	(Fresenius) Irwin & Barneby			Fabaceae		1	US (continental)	10	5	3	1	78.53981634	0
355	Senna occidentalis	(L.) Irwin & Barneby			Fabaceae		1	US (continental)	4	2.7	2	1	11.30973355	0
356	Senna occidentalis	(L.) Irwin & Barneby			Fabaceae		1	US (continental)	4.5	4	2	1	18.84955592	0
357	Sesbania macrocarpa	Muhlenberg ex Rafinesque			Fabaceae		1	US (continental)	4.3	2.3	2	1	10.35678378	0
358	Sesbania macrocarpa	Muhlenberg ex Rafinesque			Fabaceae		1	US (continental)	5	2.7	2	1	14.13716694	0
359	Sophora tomentosa	L.			Fabaceae		1	US (continental)	6.5	6.5	5	1	110.6102413	0
360	Sophora tomentosa	L.			Fabaceae		1	US (continental)	8	7	5.5	1	161.2684229	0
361	Spartium junceum	L.			Fabaceae		1	US (continental)	3	2	1.5	1	4.71238898	0
362	Spartium junceum	L.			Fabaceae		1	US (continental)	4	3.5	1.5	1	10.99557429	0
363	Sphaerophysa salsula	(Pallas) de Candolle			Fabaceae		1	US (continental)	2.3	2	1	1	2.408554368	0
364	Sphaerophysa salsula	(Pallas) de Candolle			Fabaceae		1	US (continental)	2.7	2.4	1	1	3.392920066	0
365	Sphinctospermum constrictum	(S. Watson) Rose			Fabaceae		1	US (continental)	2	1.6	1	1	1.675516082	0
366	Sphinctospermum constrictum	(S. Watson) Rose			Fabaceae		1	US (continental)	2.5	1.8	1	1	2.35619449	0
367	Strophostyles helvola	(L.) Elliot			Fabaceae		1	US (continental)	4.5	3	2	1	14.13716694	0
368	Strophostyles helvola	(L.) Elliot			Fabaceae		1	US (continental)	5.7	3	2	1	17.90707813	0
369	Stylosanthes biflora	(L.) Britton, Sterns, Poggenberg			Fabaceae		1	US (continental)	2	1.4	1.4	1	2.0525072	0
370	Stylosanthes biflora	(L.) Britton, Sterns, Poggenberg			Fabaceae		1	US (continental)	2.4	1.5	1.5	1	2.827433388	0
371	Swartzia simplex	(Swartz) Sprengel			Fabaceae		1	US (continental)	18	9	7	1	593.7610115	0
372	Swartzia simplex	(Swartz) Sprengel			Fabaceae		1	US (continental)	23	10	7	1	842.9940287	0
373	Tamarindus indica	(L.)			Fabaceae		1	US (continental)	13	9	6	1	367.5663405	0
374	Tamarindus indica	(L.)			Fabaceae		1	US (continental)	18	12	10	1	1130.973355	0
375	Tephrosia virginiana	(L.) Persoon			Fabaceae		1	US (continental)	3.2	2.5	1.5	1	6.283185307	0
376	Tephrosia virginiana	(L.) Persoon			Fabaceae		1	US (continental)	4.2	3	1.5	1	9.896016859	0
377	Thermopsis villosa	(Walter) Fernald & Schubert			Fabaceae		1	US (continental)	3	2.8	2	1	8.79645943	0
378	Thermopsis villosa	(Walter) Fernald & Schubert			Fabaceae		1	US (continental)	4.5	3.2	2	1	15.07964474	0
379	Trifolium arvense	L.			Fabaceae		1	US (continental)	0.9	0.6	0.5	1	0.141371669	0
380	Trifolium arvense	L.			Fabaceae		1	US (continental)	1.3	0.7	0.5	1	0.238237443	0
381	Trifolium dubium	Sibthorp			Fabaceae		1	US (continental)	1.5	1.2	1	1	0.942477796	0
382	Trifolium fragiferum	L.			Fabaceae		1	US (continental)	1.3	1	1	1	0.680678408	0
383	Trifolium fragiferum	L.			Fabaceae		1	US (continental)	1.6	1.4	1.2	1	1.407433509	0
384	Trifolium hirtum	Allioni			Fabaceae		1	US (continental)	1.8	1.5	1	1	1.413716694	0
385	Trifolium hirtum	Allioni			Fabaceae		1	US (continental)	2.5	2.2	2	1	5.759586532	0
386	Trifolium hybridum	L.			Fabaceae		1	US (continental)	1	0.9	0.5	1	0.235619449	0
387	Trifolium hybridum	L.			Fabaceae		1	US (continental)	1.3	1.3	0.5	1	0.442440965	0
388	Trifolium incarnatum	L.			Fabaceae		1	US (continental)	1.9	1.5	1.4	1	2.089159115	0
389	Trifolium incarnatum	L.			Fabaceae		1	US (continental)	2.3	1.6	1.5	1	2.890265241	0
390	Trifolium pratense	L.			Fabaceae		1	US (continental)	1.5	1	1	1	0.785398163	0
391	Trifolium pratense	L.			Fabaceae		1	US (continental)	2.1	1.7	1.5	1	2.803871443	0
392	Trifolium repens	L.			Fabaceae		1	US (continental)	0.9	0.8	0.8	1	0.301592895	0
393	Trifolium repens	L.			Fabaceae		1	US (continental)	1.2	1.1	1	1	0.691150384	0
394	Trifolium resupinatum	L.			Fabaceae		1	US (continental)	1.4	1.4	1	1	1.0262536	0
395	Trifolium resupinatum	L.			Fabaceae		1	US (continental)	2	1.5	1	1	1.570796327	0
396	Trifolium subterraneum	L.			Fabaceae		1	US (continental)	2.3	2.2	2	1	5.298819609	0
397	Trifolium subterraneum	L.			Fabaceae		1	US (continental)	3.2	2.6	2	1	8.712683626	0
398	Trigonella foenum-graceum	L.			Fabaceae		1	US (continental)	3.5	2.5	2	1	9.162978573	0
399	Trigonella foenum-graceum	L.			Fabaceae		1	US (continental)	5	3	2	1	15.70796327	0
400	Ulex europaeus	L.			Fabaceae		1	US (continental)	2.8	2.1	2	1	6.157521601	0
401	Ulex europaeus	L.			Fabaceae		1	US (continental)	3.3	2.6	2	1	8.984954989	0
402	Vicia benghalensis	L.			Fabaceae		1	US (continental)	3.7	3.7	3	1	21.50420171	0
403	Vicia benghalensis	L.			Fabaceae		1	US (continental)	5	4.5	3.5	1	41.23340358	0
404	Vicia faba	L.			Fabaceae		1	US (continental)	7	6.5	4.5	1	107.2068493	0
405	Vicia faba	L.			Fabaceae		1	US (continental)	30.5	17	9	1	2443.373686	0
406	Vicia grandiflora	Scopoli	kitaibeliana		Fabaceae		1	US (continental)	3	3	2	1	9.424777961	0
407	Vicia grandiflora	Scopoli	kitaibeliana		Fabaceae		1	US (continental)	4.2	3.2	2.3	1	16.18548535	0
408	Vicia leavenworthii	Torres & Gray			Fabaceae		1	US (continental)	2	1.9	1.9	1	3.78038316	0
409	Vicia leavenworthii	Torres & Gray			Fabaceae		1	US (continental)	3	3	2.5	1	11.78097245	0
410	Vicia nigricans	Hooker & Arnott	gigantea		Fabaceae		1	US (continental)	5.5	5.5	4.5	1	71.27488333	0
411	Vicia nigricans	Hooker & Arnott	gigantea		Fabaceae		1	US (continental)	6.3	6.3	5.2	1	108.0645041	0
412	Vicia pannonica	Crantz			Fabaceae		1	US (continental)	3.5	3.5	3	1	19.242255	0
413	Vicia pannonica	Crantz			Fabaceae		1	US (continental)	4.5	4	3.3	1	31.10176727	0
414	Vicia sativa	L.	nigra		Fabaceae		1	US (continental)	2.3	2.3	2.3	1	6.370626303	0
415	Vicia sativa	L.	nigra		Fabaceae		1	US (continental)	4	4	4	1	33.51032164	0
416	Vicia sativa	L.	sativa		Fabaceae		1	US (continental)	4.5	4.5	2.7	1	28.62776306	0
417	Vicia sativa	L.	sativa		Fabaceae		1	US (continental)	6	6	5	1	94.24777961	0
418	Vicia villosa	Roth	varia		Fabaceae		1	US (continental)	3.2	3.2	3	1	16.08495439	0
419	Vicia villosa	Roth	varia		Fabaceae		1	US (continental)	4.7	4	3.5	1	34.45279943	0
420	Vicia villosa	Roth	villosa		Fabaceae		1	US (continental)	2.7	2.3	2	1	6.503096793	0
421	Vicia villosa	Roth	villosa		Fabaceae		1	US (continental)	4.9	4.9	3.8	1	47.77210509	0
422	Vigna angularis	(Willdenow) Ohwi & Ohashi			Fabaceae		1	US (continental)	5	4	3	1	31.41592654	0
423	Vigna angularis	(Willdenow) Ohwi & Ohashi			Fabaceae		1	US (continental)	7.5	6	5	1	117.8097245	0
424	Vigna radiata	(L.) Wilczek			Fabaceae		1	US (continental)	3.3	3	3	1	15.55088364	0
425	Vigna radiata	(L.) Wilczek			Fabaceae		1	US (continental)	4.8	4	3.5	1	35.18583772	0
426	Vigna unguiculata	(L.) Walpers	sesquipedalis		Fabaceae		1	US (continental)	8	4	3	1	50.26548246	0
427	Vigna unguiculata	(L.) Walpers	sesquipedalis		Fabaceae		1	US (continental)	12	6	4	1	150.7964474	0
428	Vigna unguiculata	(L.) Walpers	unguiculata		Fabaceae		1	US (continental)	4.5	4.5	3	1	31.80862562	0
429	Vigna unguiculata	(L.) Walpers	unguiculata		Fabaceae		1	US (continental)	10	6.5	6	1	204.2035225	0
430	Wisteria frutescens	(L.) Poiret			Fabaceae		1	US (continental)	10	7	7	1	256.5634	0
431	Wisteria frutescens	(L.) Poiret			Fabaceae		1	US (continental)	11	8	8	1	368.613538	0
432	Wisteria sinensis	(Sims) Sweet			Fabaceae		1	US (continental)	13	12	4	1	326.725636	0
433	Wisteria sinensis	(Sims) Sweet			Fabaceae		1	US (continental)	18	17	4	1	640.8849013	0
434	Zornia bracteata	(Walter) J. F. Gmelin			Fabaceae		1	US (continental)	2.2	1.4	0.8	1	1.290147383	0
435	Zornia bracteata	(Walter) J. F. Gmelin			Fabaceae		1	US (continental)	2.4	1.6	0.8	1	1.608495439	0
436	Bidens bipinnata				Asteraceae		2	US	8.5	0.5		2	0.696058972	0
437	Bidens bipinnata				Asteraceae		2	US	11.5	1.1		3	3.407775399	0
438	Cicuta maculata				Apiaceae		2	US	2.4	1.5		2	2.01879441	0
439	Cicuta maculata				Apiaceae		2	US	3.3	2		3	3.23260362	0
440	Conium maculatum				Apiaceae		2	US	2.5	1.5		2	2.120801044	0
441	Conium maculatum				Apiaceae		2	US	3.5	2.2		3	4.148969121	0
442	Erodium cicutarium				Geraniaceae		2	US	3	0.7		2	0.467898696	0
443	Erodium cicutarium				Geraniaceae		2	US	4.2	1		2	1.498930678	0
444	Lappula echinata				Boraginaceae		2	US	2	1		2	0.65158046	0
445	Lappula echinata				Boraginaceae		2	US	3	1.5		2	2.652302454	0
446	Bidens frondosa				Asteraceae		2	US	6	3		3	13.24032384	0
447	Bidens frondosa				Asteraceae		2	US	11	4		3	43.30993505	0
448	Daucus carota				Apiaceae		2	US	2.5	1.3		2	1.509345943	0
449	Daucus carota				Apiaceae		2	US	3.4	2		3	3.330600901	0
450	Hypochoeris radicata				Asteraceae		2	US	4.5	0.5		2	0.352599408	0
451	Hypochoeris radicata				Asteraceae		2	US	5.5	0.7		2	0.904480752	0
452	Lychnis alba				Caryophyllaceae		2	US	1.3	0.9		2	0.328961352	0
453	Lychnis alba				Caryophyllaceae		2	US	1.5	1.3		2	0.845049106	0
454	Silene cucubalis				Caryophyllaceae		2	US	1	0.9		2	0.25026491	0
455	Silene cucubalis				Caryophyllaceae		2	US	1.7	1.1		2	0.671807872	0
456	Silene anthirrhina				Caryophyllaceae		2	US	0.5	0.4		2	0.023892011	0
457	Silene anthirrhina				Caryophyllaceae		2	US	0.7	0.5		2	0.052498776	0
458	Silene noctiflora				Caryophyllaceae		2	US	1	0.9		2	0.25026491	0
459	Silene noctiflora				Caryophyllaceae		2	US	1.5	1.1		2	0.586562931	0
460	Saponaria vaccaria				Caryophyllaceae		2	US	2	2	2	1	4.188790205	0
461	Saponaria vaccaria				Caryophyllaceae		2	US	2.7	2.7	2.7	1	10.3059947	0
462	Agrostemma githago				Caryophyllaceae		2	US	3.3	3		3	7.276925043	0
463	Agrostemma githago				Caryophyllaceae		2	US	3.7	3.4		3	10.48382172	0
464	Silene dichotoma				Caryophyllaceae		2	US	1.3	0.9		2	0.328961352	0
465	Silene dichotoma				Caryophyllaceae		2	US	2	1.1		2	0.802779644	0
466	Saponaria officinales				Caryophyllaceae		2	US	1.5	1.1		2	0.586562931	0
467	Saponaria officinales				Caryophyllaceae		2	US	2.2	1.5		2	1.819074791	0
468	Amaranthus albus				Amaranthaceae		2	US	0.6	0.6		2	0.064923672	0
469	Amaranthus albus				Amaranthaceae		2	US	1	0.9		2	0.25026491	0
470	Amaranthus graecizans				Amaranthaceae		2	US	1.5	1		2	0.478083745	0
471	Amaranthus graecizans				Amaranthaceae		2	US	2	1.4		2	1.383486878	0
472	Amaranthus retroflexus				Amaranthaceae		2	US	1	0.7		2	0.149178381	0
473	Amaranthus retroflexus				Amaranthaceae		2	US	1.4	1		2	0.44423253	0
474	Amaranthus spinosus				Amaranthaceae		2	US	1	0.7		2	0.149178381	0
475	Amaranthus spinosus				Amaranthaceae		2	US	1.4	1		2	0.44423253	0
476	Acnidia altissima				Amaranthaceae		2	US	0.5	0.4		2	0.023892011	0
477	Acnidia altissima				Amaranthaceae		2	US	0.9	0.7		2	0.133955089	0
478	Molluga verticillata				Aizoaceae		2	US	0.5	0.4		2	0.023892011	0
479	Molluga verticillata				Aizoaceae		2	US	0.6	0.4		2	0.028692125	0
480	Cycloloma atriplicifolium				Chenopodiaceae		2	US	1.8	1.8	1.8	1	3.053628059	0
481	Cycloloma atriplicifolium				Chenopodiaceae		2	US	2.1	2.1	2.1	1	4.849048261	0
482	Achillea millefolium				Asteraceae		2	US	1.7	0.7		2	0.257642019	0
483	Achillea millefolium				Asteraceae		2	US	2.5	0.9		2	0.660440823	0
484	Chenopodium hybridium		gigantospermum		Chenopodiaceae		2	US	1.5	1.5	1.5	1	1.767145868	0
485	Chenopodium hybridium		gigantospermum		Chenopodiaceae		2	US	2	2	2	1	4.188790205	0
486	Chenopodium album				Chenopodiaceae		2	US	1.2	1.2	1.2	1	0.904778684	0
487	Chenopodium album				Chenopodiaceae		2	US	1.6	1.6	1.6	1	2.144660585	0
488	Kochia scoparia				Chenopodiaceae		2	US	1.8	1.2		2	0.86613864	0
489	Kochia scoparia				Chenopodiaceae		2	US	2.1	1.5		2	1.721361805	0
490	Salsola kali		tenuifolia		Chenopodiaceae		2	US	1.8	1.4		2	1.225589179	0
491	Salsola kali		tenuifolia		Chenopodiaceae		2	US	2.2	1.6		2	2.12399754	0
492	Stellaria media				Caryophyllaceae		2	US	1.1	1		2	0.344375141	0
493	Stellaria media				Caryophyllaceae		2	US	1.3	1.2		2	0.606492226	0
494	Cerastium vulgatum				Caryophyllaceae		2	US	0.5	0.5		2	0.037410779	0
495	Cerastium vulgatum				Caryophyllaceae		2	US	0.8	0.7		2	0.118799677	0
496	Spergula arvensis				Caryophyllaceae		2	US	1.1	1.1	1.1	1	0.69690997	0
497	Spergula arvensis				Caryophyllaceae		2	US	1.7	1.7	1.7	1	2.572440785	0
498	Portulaca oleracea				Portulacaceae		2	US	0.6	0.4		2	0.028692125	0
499	Portulaca oleracea				Portulacaceae		2	US	0.9	0.6		2	0.097880137	0
500	Asclepias verticillata				Asclepiadaceae		2	US	5	3		3	11.03065535	0
501	Asclepias verticillata				Asclepiadaceae		2	US	5.5	3.5		3	16.52631498	0
502	Asclepias syriaca				Asclepiadaceae		2	US	8	4.4		3	38.08893393	0
503	Asclepias syriaca				Asclepiadaceae		2	US	10	5.5		3	74.71747718	0
504	Silphium terebinthinaceum				Asteraceae		2	US	8	4		3	31.45341461	0
505	Silphium terebinthinaceum				Asteraceae		2	US	13	7		3	158.8898594	0
506	Dipsacus sylvestris				Dipsacaceae		2	US	3	0.9		2	0.806440408	0
507	Dipsacus sylvestris				Dipsacaceae		2	US	4	1.2		2	2.182692008	0
508	Ambrosia artemisiifolia				Asteraceae		2	US	3	1.8		3	2.380125552	0
509	Ambrosia artemisiifolia				Asteraceae		2	US	4	2.5		3	6.12450254	0
510	Ambrosia trifida				Asteraceae		2	US	6	4		3	23.56770097	0
511	Ambrosia trifida				Asteraceae		2	US	12	6		3	107.1111637	0
512	Atriplex argentea				Chenopodiaceae		2	US	3	2.5		3	4.592523939	0
513	Atriplex argentea				Chenopodiaceae		2	US	4	4		3	15.69689399	0
514	Helianthus annuus				Asteraceae		2	US	5.5	2.2		3	6.521684191	0
515	Helianthus annuus				Asteraceae		2	US	8	2.6		3	13.25997062	0
516	Cirsium arvense				Asteraceae		2	US	2.5	0.8		2	0.512217669	0
517	Cirsium arvense				Asteraceae		2	US	3	1		2	1.01977709	0
518	Cirsium flodmani				Asteraceae		2	US	3	1.5		2	2.652302454	0
519	Cirsium flodmani				Asteraceae		2	US	4	2		3	3.918633501	0
520	Cirsium vulgare				Asteraceae		2	US	3.5	1.2		2	1.858560725	0
521	Cirsium vulgare				Asteraceae		2	US	4	1.7		3	2.830839118	0
522	Cirsium altissimum				Asteraceae		2	US	4	1.7		3	2.830839118	0
523	Cirsium altissimum				Asteraceae		2	US	5	2.2		3	5.928377544	0
524	Chrysanthemum leucanthemum				Asteraceae		2	US	1.5	0.6		2	0.164782322	0
525	Chrysanthemum leucanthemum				Asteraceae		2	US	2	0.9		2	0.519078379	0
526	Cichorium intybus				Asteraceae		2	US	2.2	0.9		2	0.5750669	0
527	Cichorium intybus				Asteraceae		2	US	3	1.5		2	2.652302454	0
528	Apocynum cannabinum				Asclepiadaceae		2	US	4.5	0.8		2	0.974100789	0
529	Apocynum cannabinum				Asclepiadaceae		2	US	6	1		2	2.293992581	0
530	Cyperus esculentus				Cyperaceae		2	US	1.1	0.5		2	0.082886801	0
531	Cyperus esculentus				Cyperaceae		2	US	1.5	0.7		2	0.226313015	0
532	Rumex acetosella				Polygonaceae		2	US	1	0.8		2	0.196202237	0
533	Rumex acetosella				Polygonaceae		2	US	1.3	1.1		2	0.502973648	0
534	Polygonum aviculare				Polygonaceae		2	US	2.5	1.5		2	2.120801044	0
535	Polygonum aviculare				Polygonaceae		2	US	3	2		3	2.938625751	0
536	Croton capitatus				Euphorbiaceae		2	US	4	4	4	1	33.51032164	0
537	Croton capitatus				Euphorbiaceae		2	US	5	5	5	1	65.44984695	0
538	Taraxacum officinale				Asteraceae		2	US	3	1.1		2	1.266256677	0
539	Taraxacum officinale				Asteraceae		2	US	4	1.3		2	2.657187348	0
540	Malva neglecta				Malvaceae		2	US	2.112068966	1.75		3	1.583710566	0
541	Malva neglecta				Malvaceae		2	US	1.896551724	1.724137931		3	1.380351224	0
542	Potentilla norvegica				Rosaceae		2	US	0.8	0.6		2	0.086858009	0
543	Potentilla norvegica				Rosaceae		2	US	1	0.7		2	0.149178381	0
544	Urtica dioica				Urticaceae		2	US	0.9	0.7		2	0.133955089	0
545	Urtica dioica				Urticaceae		2	US	1.2	0.9		2	0.302543719	0
546	Diodia teres				Rubiaceae		2	US	3	2.3		3	3.886779587	0
547	Diodia teres				Rubiaceae		2	US	4.2	2.9		3	8.655840895	0
548	Galium aparine				Rubiaceae		2	US	2	2	2	1	4.188790205	0
549	Galium aparine				Rubiaceae		2	US	3	3	3	1	14.13716694	0
550	Datura stramonium				Solanaceae		2	US	3	2.5		3	4.592523939	0
551	Datura stramonium				Solanaceae		2	US	3.8	3		3	8.380609626	0
552	Solanum rostratum				Solanaceae		2	US	2.5	2		3	2.44870922	0
553	Solanum rostratum				Solanaceae		2	US	3	2.5		3	4.592523939	0
554	Physalis heterophyla				Solanaceae		2	US	2	1.7		3	1.415176391	0
555	Physalis heterophyla				Solanaceae		2	US	2.5	2		3	2.44870922	0
556	Solanum carolinense				Solanaceae		2	US	1	0.9		2	0.25026491	0
557	Solanum carolinense				Solanaceae		2	US	1.6	1.3		2	0.907845282	0
558	Solanum nigrum				Solanaceae		2	US	1	0.9		2	0.25026491	0
559	Solanum nigrum				Solanaceae		2	US	1.6	1.3		2	0.907845282	0
560	Solanum dulcamara				Solanaceae		2	US	2	1.7		3	1.415176391	0
561	Solanum dulcamara				Solanaceae		2	US	2.6	2		3	2.546687868	0
562	Verbena bracteata				Verbenaceae		2	US	2	0.7		2	0.305144613	0
563	Verbena bracteata				Verbenaceae		2	US	2.4	0.9		2	0.631797363	0
564	Verbena hastata				Verbenaceae		2	US	1.7	0.7		2	0.257642019	0
565	Verbena hastata				Verbenaceae		2	US	2	0.9		2	0.519078379	0
566	Verbena stricta				Verbenaceae		2	US	2.4	0.6		2	0.267608741	0
567	Verbena stricta				Verbenaceae		2	US	3.1	0.8		2	0.6459191	0
568	Verbena urticifolia				Verbenaceae		2	US	1.5	0.5		2	0.113557536	0
569	Verbena urticifolia				Verbenaceae		2	US	1.8	0.6		2	0.198728043	0
570	Plantago aristata				Plantaginaceae		2	US	2.5	1.3		2	1.509345943	0
571	Plantago aristata				Plantaginaceae		2	US	3	1.5		2	2.652302454	0
572	Plantago lanceolata				Plantaginaceae		2	US	2.3	1		2	0.759071001	0
573	Plantago lanceolata				Plantaginaceae		2	US	2.6	1.3		2	1.58021658	0
574	Plantago rugelii				Plantaginaceae		2	US	2	0.9		2	0.519078379	0
575	Plantago rugelii				Plantaginaceae		2	US	2.6	1.1		2	1.075898887	0
576	Ranunculus abortivus				Ranunculaceae		2	US	1.3	1.1		2	0.502973648	0
577	Ranunculus abortivus				Ranunculaceae		2	US	1.7	1.3		2	0.971448904	0
578	Ranunculus acris				Ranunculaceae		2	US	2.2	2		3	2.154787251	0
579	Ranunculus acris				Ranunculaceae		2	US	3.3	2.6		3	5.464579001	0
580	Ranunculus bulbosus				Ranunculaceae		2	US	3	2.3		3	3.886779587	0
581	Ranunculus bulbosus				Ranunculaceae		2	US	3.5	2.8		3	6.722741319	0
582	Ranunculus sceleratus				Ranunculaceae		2	US	0.9	0.7		2	0.133955089	0
583	Ranunculus sceleratus				Ranunculaceae		2	US	1.1	0.9		2	0.276311571	0
584	Linaria vulgaris				Scrophulariaceae		2	US	1.5	1.5	1.5	1	1.767145868	0
585	Linaria vulgaris				Scrophulariaceae		2	US	2.5	2.5	2.5	1	8.181230869	0
586	Verbascum thapsus				Scrophulariaceae		2	US	0.6	0.4		2	0.028692125	0
587	Verbascum thapsus				Scrophulariaceae		2	US	0.9	0.5		2	0.06765745	0
588	Verbascum blattaria				Scrophulariaceae		2	US	0.6	0.4		2	0.028692125	0
589	Verbascum blattaria				Scrophulariaceae		2	US	0.9	0.5		2	0.06765745	0
590	Neslia paniculata				Brassicaceae		2	US	1.9	1		2	0.616315698	0
591	Neslia paniculata				Brassicaceae		2	US	2.2	1.3		2	1.301578707	0
592	Tragopogon pratensis				Asteraceae		2	US	10	1.3		3	4.139167344	0
593	Tragopogon pratensis				Asteraceae		2	US	13	1.8		3	10.32381047	0
594	Pastinaca sativa				Apiaceae		2	US	5	4		3	19.63043415	0
595	Pastinaca sativa				Apiaceae		2	US	7	5.7		3	56.05092336	0
596	Picris echioides				Asteraceae		2	US	3	0.3		2	0.081360686	0
597	Picris echioides				Asteraceae		2	US	3.5	1.1		2	1.513516996	0
598	Cynoglossum officinale				Boraginaceae		2	US	5	4		3	19.63043415	0
599	Cynoglossum officinale				Boraginaceae		2	US	7	5		3	43.06258211	0
600	Convolvulus arvensis				Convolvulaceae		2	US	4	2.4		3	5.644012849	0
601	Convolvulus arvensis				Convolvulaceae		2	US	4.5	3		3	9.926263281	0
602	Convolvulus sepium				Convolvulaceae		2	US	4	3.5		3	12.01258466	0
603	Convolvulus sepium				Convolvulaceae		2	US	6	4		3	23.56770097	0
604	Lithospermum arvense				Boraginaceae		2	US	2.6	1.7		3	1.839824144	0
605	Lithospermum arvense				Boraginaceae		2	US	3.7	2.6		3	6.127444486	0
606	Vernonia altissima				Asteraceae		2	US	2.4	0.7		2	0.369431704	0
607	Vernonia altissima				Asteraceae		2	US	3	0.8		2	0.623346033	0
608	Centaurea maculosa				Asteraceae		2	US	2.5	1.1		2	1.029344227	0
609	Centaurea maculosa				Asteraceae		2	US	3	1.5		2	2.652302454	0
610	Centaurea repens				Asteraceae		2	US	2.5	1.3		2	1.509345943	0
611	Centaurea repens				Asteraceae		2	US	3.5	2.2		3	4.148969121	0
612	Arctium minus				Asteraceae		2	US	4.5	2.3		3	5.831544263	0
613	Arctium minus				Asteraceae		2	US	6	2.7		3	10.72139586	0
614	Cannabis sativa				Cannabinaceae		2	US	3.5	2.2		3	4.148969121	0
615	Cannabis sativa				Cannabinaceae		2	US	5	3		3	11.03065535	0
616	Polanisia graveolens				Capparidaceae		2	US	1.9	1.9	1.9	1	3.591364002	0
617	Polanisia graveolens				Capparidaceae		2	US	2.2	2.2	2.2	1	5.575279763	0
618	Cuscuta pentagona				Convolvulaceae		2	US	1.1	0.9		2	0.276311571	0
619	Cuscuta pentagona				Convolvulaceae		2	US	1.6	1.3		2	0.907845282	0
620	Cuscuta planiflora				Convolvulaceae		2	US	0.7	0.5		2	0.052498776	0
621	Cuscuta planiflora				Convolvulaceae		2	US	1	0.7		2	0.149178381	0
622	Eupatorium serotinum				Asteraceae		2	US	1.5	0.3		2	0.040422724	0
623	Eupatorium serotinum				Asteraceae		2	US	2.4	0.6		2	0.267608741	0
624	Grindelia squarrosa				Asteraceae		2	US	2.5	1		2	0.832144908	0
625	Grindelia squarrosa				Asteraceae		2	US	4.7	1.7		3	3.326435969	0
626	Anthemis cotula				Asteraceae		2	US	1.3	0.7		2	0.195255526	0
627	Anthemis cotula				Asteraceae		2	US	1.8	1		2	0.581333646	0
628	Hieracium aurantiacum				Asteraceae		2	US	1.8	0.3		2	0.048569097	0
629	Hieracium aurantiacum				Asteraceae		2	US	2.2	0.4		2	0.106478233	0
630	Iva axillaris				Asteraceae		2	US	1.7	1.3		2	0.971448904	0
631	Iva axillaris				Asteraceae		2	US	2.4	1.7		3	1.69827003	0
632	Iva xanthifolia				Asteraceae		2	US	1.7	1.1		2	0.671807872	0
633	Iva xanthifolia				Asteraceae		2	US	2.5	1.6		2	2.483112214	0
634	Geranium carolinianum				Geraniaceae		2	US	1.7	1.1		2	0.671807872	0
635	Geranium carolinianum				Geraniaceae		2	US	2	1.3		2	1.167104448	0
636	Tanacetum vulgare				Asteraceae		2	US	1.3	0.5		2	0.09818683	0
637	Tanacetum vulgare				Asteraceae		2	US	1.7	0.7		2	0.257642019	0
638	Galinsoga parviflora				Asteraceae		2	US	1.1	0.6		2	0.120034309	0
639	Galinsoga parviflora				Asteraceae		2	US	1.6	0.7		2	0.241943578	0
640	Helenium tenuifolium				Asteraceae		2	US	1	0.6		2	0.108938903	0
641	Helenium tenuifolium				Asteraceae		2	US	1.5	0.9		2	0.382353074	0
642	Anagallis arvensis				Primulaceae		2	US	0.9	0.6		2	0.097880137	0
643	Anagallis arvensis				Primulaceae		2	US	1.2	0.6		2	0.131166353	0
644	Rudbeckia serotina				Asteraceae		2	US	1.5	0.4		2	0.072218834	0
645	Rudbeckia serotina				Asteraceae		2	US	2.2	0.6		2	0.244501952	0
646	Xanthium pensylvanicum				Asteraceae		2	US	12	4.5		3	59.91574343	0
647	Xanthium pensylvanicum				Asteraceae		2	US	14	5		3	86.57098101	0
648	Echinocystis lobata				Cucurbitaceae		2	US	15	7		3	183.8587336	0
649	Echinocystis lobata				Cucurbitaceae		2	US	20	8		3	325.2669395	0
650	Lactuca canadensis				Asteraceae		2	US	4	1.5		2	3.822646473	0
651	Lactuca canadensis				Asteraceae		2	US	5	1.7		3	3.538852857	0
652	Mirabilis nyctaginea				Nyctaginaceae		2	US	4	1.5		2	3.822646473	0
653	Mirabilis nyctaginea				Nyctaginaceae		2	US	5	1.7		3	3.538852857	0
654	Ipomoea hederacea				Convolvulaceae		2	US	5	3		3	11.03065535	0
655	Ipomoea hederacea				Convolvulaceae		2	US	6	4		3	23.56770097	0
656	Ipomoea pandurata				Convolvulaceae		2	US	5	4		3	19.63043415	0
657	Ipomoea pandurata				Convolvulaceae		2	US	6.5	5		3	39.97189865	0
658	Ipomoea purpurea				Convolvulaceae		2	US	4.7	3.3		3	12.54857083	0
659	Ipomoea purpurea				Convolvulaceae		2	US	5.7	4		3	22.38612963	0
660	Rudbeckia laciniata				Asteraceae		2	US	4	1.1		2	1.771125184	0
661	Rudbeckia laciniata				Asteraceae		2	US	5	1.3		2	3.523345718	0
662	Rumex crispus				Polygonaceae		2	US	2.1	1.4		2	1.464064811	0
663	Rumex crispus				Polygonaceae		2	US	2.6	1.7		3	1.839824144	0
664	Rumex obtusifolius				Polygonaceae		2	US	2	1.1		2	0.802779644	0
665	Rumex obtusifolius				Polygonaceae		2	US	2.5	1.5		2	2.120801044	0
666	Rumex altissimus				Polygonaceae		2	US	2	1.3		2	1.167104448	0
667	Rumex altissimus				Polygonaceae		2	US	2.7	1.7		3	1.910603025	0
668	Polygonum convolvulus				Polygonaceae		2	US	3	2		3	2.938625751	0
669	Polygonum convolvulus				Polygonaceae		2	US	4	2.5		3	6.12450254	0
670	Setaria lutescens				Poaceae		2	US	2.5	1.8		3	1.98334245	0
671	Setaria lutescens				Poaceae		2	US	3	2.1		3	3.239953335	0
672	Setaria viridis				Poaceae		2	US	1.8	1		2	0.581333646	0
673	Setaria viridis				Poaceae		2	US	2.2	1.3		2	1.301578707	0
674	Setaria faberii				Poaceae		2	US	2.2	1.2		2	1.084407841	0
675	Setaria faberii				Poaceae		2	US	2.5	1.5		2	2.120801044	0
676	Setaria verticillata				Poaceae		2	US	1.8	1		2	0.581333646	0
677	Setaria verticillata				Poaceae		2	US	2.2	1.3		2	1.301578707	0
678	Echinochloa crusgalli				Poaceae		2	US	2.2	1.6		2	2.12399754	0
679	Echinochloa crusgalli				Poaceae		2	US	3	2.2		3	3.556003487	0
680	Lactuca scariola				Asteraceae		2	US	3	1.1		2	1.266256677	0
681	Lactuca scariola				Asteraceae		2	US	4	1.5		2	3.822646473	0
682	Sonchus oleraceous				Asteraceae		2	US	2.6	0.7		2	0.40198252	0
683	Sonchus oleraceous				Asteraceae		2	US	3.3	1.1		2	1.413371124	0
684	Sonchus arvensis				Asteraceae		2	US	2.4	0.7		2	0.369431704	0
685	Sonchus arvensis				Asteraceae		2	US	3	1.1		2	1.266256677	0
686	Bromus tectorum				Poaceae		2	US	8	0.9		2	2.521478943	0
687	Bromus tectorum				Poaceae		2	US	12	1.1		3	3.556003487	0
688	Spita spartea				Poaceae		2	US	6	0.6		2	0.708592114	0
689	Spita spartea				Poaceae		2	US	12	0.7		2	2.238138744	0
690	Agropyrum repens				Poaceae		2	US	8	1.3		3	3.311001258	0
691	Agropyrum repens				Poaceae		2	US	9	1.8		3	7.144502702	0
692	Avena fatua				Poaceae		2	US	11	2		3	10.78520941	0
693	Avena fatua				Poaceae		2	US	14	5.5		3	104.9774511	0
694	Panicum capillare				Poaceae		2	US	1.1	0.6		2	0.120034309	0
695	Panicum capillare				Poaceae		2	US	1.8	0.9		2	0.4638318	0
696	Muhlenbergia schreberi				Poaceae		2	US	1.8	0.4		2	0.086858009	0
697	Muhlenbergia schreberi				Poaceae		2	US	2.2	0.6		2	0.244501952	0
698	Eragrostis cilianensis				Poaceae		2	US	0.6	0.4		2	0.028692125	0
699	Eragrostis cilianensis				Poaceae		2	US	0.9	0.9		2	0.224403734	0
700	Sida spinosa				Malvaceae		2	US	1.8	1.3		2	1.035859973	0
701	Sida spinosa				Malvaceae		2	US	2.2	1.7		3	1.556720779	0
702	Hordeum jubatum				Poaceae		2	US	5	1		2	1.84098315	0
703	Hordeum jubatum				Poaceae		2	US	7.5	1.5		3	4.133041244	0
704	Digitaria sanguinalis				Poaceae		2	US	2.5	0.9		2	0.660440823	0
705	Digitaria sanguinalis				Poaceae		2	US	3.5	1.1		2	1.513516996	0
706	Bromus secalinus				Poaceae		2	US	6.5	1.5		3	3.581729566	0
707	Bromus secalinus				Poaceae		2	US	8	2		3	7.840993667	0
708	Polygonum lapathifolium				Polygonaceae		2	US	1.5	1.3		2	0.845049106	0
709	Polygonum persicaria				Polygonaceae		2	US	2	1.7		3	1.415176391	0
710	Polygonum persicaria				Polygonaceae		2	US	2.5	2		3	2.44870922	0
711	Polygonum pensylvanicum				Polygonaceae		2	US	2.8	2.6		3	4.636146823	0
712	Polygonum pensylvanicum				Polygonaceae		2	US	3.5	3		3	7.718363502	0
713	Polygonum hydropiper				Polygonaceae		2	US	2.2	1.5		2	1.819074791	0
714	Polygonum hydropiper				Polygonaceae		2	US	3	1.9		3	2.652017512	0
715	Abutilon theophrasti				Malvaceae		2	US	3	2.2		3	3.556003487	0
716	Abutilon theophrasti				Malvaceae		2	US	3.6	2.6		3	5.961718136	0
717	Rosa arkansana				Rosaceae		2	US	3.5	2.4		3	4.938088639	0
718	Rosa arkansana				Rosaceae		2	US	4.5	3		3	9.926263281	0
719	Dracocephalum parviflorum				Lamiaceae		2	US	2.1	1.2		2	1.028961202	0
720	Dracocephalum parviflorum				Lamiaceae		2	US	3	1.8		3	2.380125552	0
721	Brassica juncea				Brassicaceae	P	2	US	2.112068966	1.603448276		2	2.032415102	0
722	Brassica juncea				Brassicaceae	P	2	US	1.887931034	1.706896552		3	1.346727273	0
723	Brassica kaber				Brassicaceae	P	2	US	1.810344828	1.767241379		3	1.384312557	0
724	Brassica kaber				Brassicaceae	P	2	US	1.586206897	1.534482759		2	1.308404126	0
725	Raphanus raphanistrum				Brassicaceae		2	US	2	1.7		3	1.415176391	0
726	Raphanus raphanistrum				Brassicaceae		2	US	4	2.3		3	5.183187528	0
727	Brassica nigra				Brassicaceae		2	US	1.2	1.1		2	0.461799879	0
728	Brassica nigra				Brassicaceae		2	US	1.5	1.3		2	0.845049106	0
729	Berteroa incana				Brassicaceae		2	US	1.5	1.3		2	0.845049106	0
730	Berteroa incana				Brassicaceae		2	US	1.9	1.7		3	1.344406021	0
731	Barbarea vulgaris				Brassicaceae		2	US	1.5	0.8		2	0.298645771	0
732	Barbarea vulgaris				Brassicaceae		2	US	1.9	1		2	0.616315698	0
733	Camelina microcarpa				Brassicaceae		2	US	1	0.6		2	0.108938903	0
734	Camelina microcarpa				Brassicaceae		2	US	1.3	0.8		2	0.257320964	0
735	Camelina sativa				Brassicaceae		2	US	1.9	1.1		2	0.758708472	0
736	Camelina sativa				Brassicaceae		2	US	2.4	1.3		2	1.439282752	0
737	Capsella bursa-pastoris				Brassicaceae		2	US	0.9	0.4		2	0.043135892	0
738	Capsella bursa-pastoris				Brassicaceae		2	US	1.2	0.6		2	0.131166353	0
739	Lepidium virginicum				Brassicaceae		2	US	1.1	0.7		2	0.164469551	0
740	Lepidium virginicum				Brassicaceae		2	US	1.5	1		2	0.478083745	0
741	Lepidium campestre				Brassicaceae		2	US	2	1.1		2	0.802779644	0
742	Lepidium campestre				Brassicaceae		2	US	2.5	1.5		2	2.120801044	0
743	Cardaria draba				Brassicaceae		2	US	1.8	1		2	0.581333646	0
744	Cardaria draba				Brassicaceae		2	US	2.2	1.5		2	1.819074791	0
745	Euphorbia corollata				Euphorbiaceae		2	US	2	1.3		2	1.167104448	0
746	Euphorbia corollata				Euphorbiaceae		2	US	2.5	1.5		2	2.120801044	0
747	Euphorbia esula				Euphorbiaceae		2	US	2	1.3		2	1.167104448	0
748	Euphorbia esula				Euphorbiaceae		2	US	2.5	1.5		2	2.120801044	0
749	Euphorbia nutans				Euphorbiaceae		2	US	1.1	0.6		2	0.120034309	0
750	Euphorbia nutans				Euphorbiaceae		2	US	1.5	0.9		2	0.382353074	0
751	Euphorbia cyparissias				Euphorbiaceae		2	US	1.8	1.2		2	0.86613864	0
752	Euphorbia cyparissias				Euphorbiaceae		2	US	2.1	1.5		2	1.721361805	0
753	Cenchrus pauciflorus				Poaceae		2	US	2.6	2		3	2.546687868	0
754	Cenchrus pauciflorus				Poaceae		2	US	3.5	3		3	7.718363502	0
755	Tribulus terrestris				Zygophyllaceae		2	US	4	4		3	15.69689399	0
756	Tribulus terrestris				Zygophyllaceae		2	US	5	5		3	30.71349572	0
757	Sorghum halepense				Poaceae		2	US	2	1.3		2	1.167104448	0
758	Sorghum halepense				Poaceae		2	US	3	1.8		3	2.380125552	0
759	Glycyrrhiza lepidota				Fabaceae		2	US	3	2		3	2.938625751	0
760	Glycyrrhiza lepidota				Fabaceae		2	US	4	2.8		3	7.684027708	0
761	Astragulus canadensis				Fabaceae		2	US	1.6	1		2	0.512217669	0
762	Astragulus canadensis				Fabaceae		2	US	2	1.5		2	1.625080035	0
763	Oenthera biennis				Onagraceae		2	US	1.5	0.9		2	0.382353074	0
764	Oenthera biennis				Onagraceae		2	US	1.7	1.3		2	0.971448904	0
765	Nepeta cataria				Lamiaceae		2	US	1.1	0.9		2	0.276311571	0
766	Nepeta cataria				Lamiaceae		2	US	1.5	1.1		2	0.586562931	0
767	Lycopus virginicus				Lamiaceae		2	US	1	0.6		2	0.108938903	0
768	Lycopus virginicus				Lamiaceae		2	US	1.3	1		2	0.410664024	0
769	Thlaspi arvense				Brassicaceae		2	US	1.6	1.1		2	0.628978444	0
770	Thlaspi arvense				Brassicaceae		2	US	2	1.4		2	1.383486878	0
771	Oxalis stricta				Oxalidaceae		2	US	1.3	0.9		2	0.328961352	0
772	Oxalis stricta				Oxalidaceae		2	US	1.5	1.1		2	0.586562931	0
773	Argemone mexicana				Papaveraceae		2	US	1.6	1.6	1.6	1	2.144660585	0
774	Argemone mexicana				Papaveraceae		2	US	1.9	1.9	1.9	1	3.591364002	0
775	Eleusine indica				Poaceae		2	US	1	0.9		2	0.25026491	0
776	Eleusine indica				Poaceae		2	US	1.5	1.1		2	0.586562931	0
777	Conringa orientalis				Brassicaceae		2	US	2.2	1		2	0.722958111	0
778	Conringa orientalis				Brassicaceae		2	US	2.8	1.3		2	1.724380194	0
779	Erucastrum gallicum				Brassicaceae		2	US	1	0.6		2	0.108938903	0
780	Erucastrum gallicum				Brassicaceae		2	US	1.2	0.8		2	0.236832257	0
781	Sisymbrium altissimum				Brassicaceae		2	US	0.8	0.5		2	0.060069278	0
782	Sisymbrium altissimum				Brassicaceae		2	US	1.1	0.6		2	0.120034309	0
783	Sisymbrium officinale				Brassicaceae		2	US	1.1	0.7		2	0.164469551	0
784	Sisymbrium officinale				Brassicaceae		2	US	1.5	0.9		2	0.382353074	0
785	Euphorbia marginata				Euphorbiaceae		2	US	3	2.1		3	3.239953335	0
786	Euphorbia marginata				Euphorbiaceae		2	US	4	3		3	8.822165999	0
787	Teucrium canadense				Lamiaceae		2	US	1.5	1		2	0.478083745	0
788	Teucrium canadense				Lamiaceae		2	US	2	1.2		2	0.974100789	0
789	Hypericum perforatum				Clusiaceae		2	US	1	0.4		2	0.047964955	0
790	Hypericum perforatum				Clusiaceae		2	US	1.3	0.5		2	0.09818683	0
791	Juncoides campestre				Juncaceae		2	US	1.5	0.7		2	0.226313015	0
792	Juncoides campestre				Juncaceae		2	US	2	0.9		2	0.519078379	0
793	Galeopsis tetrahit				Lamiaceae		2	US	2.5	1.5		2	2.120801044	0
794	Galeopsis tetrahit				Lamiaceae		2	US	3.2	2		3	3.134608668	0
795	Medicago lupilina				Fabaceae		2	US	1.5	1		2	0.478083745	0
796	Medicago lupilina				Fabaceae		2	US	2	1.5		2	1.625080035	0
797	Cassina nictitans				Fabaceae		2	US	3	2.2		3	3.556003487	0
798	Cassina nictitans				Fabaceae		2	US	4	2.8		3	7.684027708	0
799	Vicia angustifolia				Fabaceae		2	US	2.7	2.7	2.7	1	10.3059947	0
800	Vicia angustifolia				Fabaceae		2	US	3.6	3.6	3.6	1	24.42902447	0
801	Hedeoma pulegioides				Lamiaceae		2	US	0.9	0.5		2	0.06765745	0
802	Hedeoma pulegioides				Lamiaceae		2	US	1.1	0.8		2	0.216459348	0
803	Leonurus cardiaca				Lamiaceae		2	US	1.7	1.1		2	0.671807872	0
804	Leonurus cardiaca				Lamiaceae		2	US	2	1.3		2	1.167104448	0
805	Prunella vulgaris				Lamiaceae		2	US	1.6	0.9		2	0.409327164	0
806	Prunella vulgaris				Lamiaceae		2	US	2.2	1.1		2	0.892163733	0
807	Salvia reflexa				Lamiaceae		2	US	2	1.4		2	1.383486878	0
808	Salvia reflexa				Lamiaceae		2	US	2.4	1.6		2	2.361554559	0
809	Physalis lanceolata				Solanaceae		2	US	2	1.7		3	1.415176391	0
810	Physalis lanceolata				Solanaceae		2	US	2.5	2		3	2.44870922	0
811	Anthemis arvensis		ray seeds		Asteraceae		2	US	2.2	1		2	0.722958111	0
812	Anthemis arvensis		ray seeds		Asteraceae		2	US	2.5	1.3		2	1.509345943	0
813	Anthemis arvensis		disk seeds		Asteraceae		2	US	1.8	0.7		2	0.273408338	0
814	Anthemis arvensis		disk seeds		Asteraceae		2	US	2	0.9		2	0.519078379	0
815	Amaranthus albus	L.			Amaranthaceae	P	3	Spain	0.89	0.7625		2	0.157736682	0
816	Amaranthus albus	L.			Amaranthaceae	P	3	Spain	1.05625	0.975		2	0.312989977	0
817	Amaranthus blitoides	Watson			Amaranthaceae	P	3	Spain	1.91125	1.89375		3	1.67826059	0
818	Amaranthus blitoides	Watson			Amaranthaceae	P	3	Spain	2.05625	1.7825		3	1.599659151	0
819	Amaranthus hybridus		erythrostachys Moq.		Amaranthaceae	P	3	Spain	1.15125	1.0275		2	0.382498894	0
820	Amaranthus hybridus		erythrostachys Moq.		Amaranthaceae	P	3	Spain	1.275	1.04875		2	0.4450223	0
821	Amaranthus muricatus	(Moq.). Gillies			Amaranthaceae	P	3	Spain	1.41125	1.2725		2	0.753699554	0
822	Amaranthus muricatus	(Moq.). Gillies			Amaranthaceae	P	3	Spain	1.54875	1.2675		2	0.827785231	0
823	Amaranthus retroflexus	L.			Amaranthaceae	P	3	Spain	1.39375	1.39375		2	0.909122092	0
824	Amaranthus retroflexus	L.			Amaranthaceae	P	3	Spain	1.54375	1.54		2	1.278737849	0
825	Amaranthus silvester	(Desf.) Villars			Amaranthaceae	P	3	Spain	1.265	1.175		2	0.562731079	0
826	Amaranthus silvester	(Desf.) Villars			Amaranthaceae	P	3	Spain	1.53	1.43		2	1.069216208	0
827	Ambrosia artemisiaefolia	L.			Asteraceae	P	3	Spain	1.91125	1.54375		2	1.648407666	0
828	Ambrosia artemisiaefolia	L.			Asteraceae	P	3	Spain	2.5275	1.93		3	2.305342425	0
829	Xanthium orientale	L.			Asteraceae	P	3	Spain	13.645	5.08		3	87.10286864	0
830	Xanthium orientale	L.			Asteraceae	P	3	Spain	13.665	5.74		3	111.6906336	0
831	Xanthium spinosum	L.			Asteraceae	P	3	Spain	9.332	4.544		3	47.43954757	0
832	Xanthium spinosum	L.			Asteraceae	P	3	Spain	12.236	6.076		3	112.0669124	0
833	Xanthium strumarium	L.			Asteraceae	P	3	Spain	16.84	8.13		3	281.4956189	0
834	Xanthium strumarium	L.			Asteraceae	P	3	Spain	15.675	10.295		3	426.7841327	0
835	Anchusa azurea	Miller			Boraginaceae	P	3	Spain	6.946296296	3.014814815		3	15.48450037	0
836	Anchusa azurea	Miller			Boraginaceae	P	3	Spain	7.307407407	3.583333333		3	23.03327925	0
837	Asperugo procumbens	L.			Boraginaceae	P	3	Spain	2.646	1.648		2	2.868050503	0
838	Asperugo procumbens	L.			Boraginaceae	P	3	Spain	2.956	1.851		3	2.48002543	0
839	Borrago officinalis	L.			Boraginaceae	P	3	Spain	4.722222222	2.492592593		3	7.188459307	0
840	Borrago officinalis	L.			Boraginaceae	P	3	Spain	5.805555556	3.038888889		3	13.14538443	0
841	Cerinthe major	L.			Boraginaceae	P	3	Spain	4.290909091	3.86969697	3.110606061	1	27.04393647	0
842	Echium plantagineum	L.			Boraginaceae	P	3	Spain	2.746	1.74	1.53	1	3.827717117	0
843	Heliotropium curassavicum	L.			Boraginaceae	P	3	Spain	1.85	1.156944444		2	0.823412926	0
844	Heliotropium curassavicum	L.			Boraginaceae	P	3	Spain	1.7	1.136111111		2	0.720898261	0
845	Heliotropium europaeum	L.			Boraginaceae	P	3	Spain	3.762962963	3.607407407		3	12.00494873	0
846	Heliotropium europaeum	L.			Boraginaceae	P	3	Spain	3.957407407	3.787037037		3	13.91714786	0
847	Lithospermum arvense	L.			Boraginaceae	P	3	Spain	3.17	1.954		3	2.963962809	0
848	Lithospermum arvense	L.			Boraginaceae	P	3	Spain	3.269	2.028		3	3.29255095	0
849	Myosotis arvense	L.			Boraginaceae	P	3	Spain	1.321	0.93		2	0.35837776	0
850	Myosotis arvense	L.			Boraginaceae	P	3	Spain	1.729	1.119		2	0.7103805	0
851	Agrostemma githago	L.			Caryophyllaceae	P	3	Spain	5.107142857	3.814285714		3	18.22934085	0
852	Agrostemma githago	L.			Caryophyllaceae	P	3	Spain	5.257142857	4.357142857		3	24.50464177	0
853	Arenaria cerastioides	Poiret			Caryophyllaceae	P	3	Spain	0.523	0.416		2	0.027043756	0
854	Arenaria cerastioides	Poiret			Caryophyllaceae	P	3	Spain	0.73	0.726		2	0.116567833	0
855	Cerastium glomeratum	Thuill			Caryophyllaceae	P	3	Spain	0.534	0.418		2	0.027882383	0
856	Cerastium glomeratum	Thuill			Caryophyllaceae	P	3	Spain	0.721	0.635		2	0.08769111	0
857	Silene inflata	(Salisb.) Sm.			Caryophyllaceae	P	3	Spain	1.8	1.463333333		2	1.356768644	0
858	Silene inflata	(Salisb.) Sm.			Caryophyllaceae	P	3	Spain	2.162222222	1.921111111		3	1.953963442	0
859	Spergula arvensis	L.			Caryophyllaceae	P	3	Spain	1.03	0.831		2	0.21877024	0
860	Spergula arvensis	L.			Caryophyllaceae	P	3	Spain	1.121	1.121		2	0.447164523	0
861	Spergularia rubra	L.			Caryophyllaceae	P	3	Spain	0.57	0.431		2	0.031660943	0
862	Spergularia rubra	L.			Caryophyllaceae	P	3	Spain	0.742	0.637		2	0.090858661	0
863	Stellaria media	(L.) Villars			Caryophyllaceae	P	3	Spain	1.074117647	0.967058824		2	0.313126906	0
864	Stellaria media	(L.) Villars			Caryophyllaceae	P	3	Spain	1.224705882	1.110588235		2	0.48167489	0
865	Vaccaria pyramidata	Medicus			Caryophyllaceae	P	3	Spain	3.277777778	3.166666667		3	8.054091158	0
866	Vaccaria pyramidata	Medicus			Caryophyllaceae	P	3	Spain	3.777777778	3.538888889		3	11.59815413	0
867	Atriplex hastatus	L.			Chenopodiaceae	P	3	Spain	2.988888889	2.988888889		3	6.541571183	0
868	Atriplex hastatus	L.			Chenopodiaceae	P	3	Spain	3.494444444	3.488888889		3	10.42580115	0
869	Atriplex patula	L.			Chenopodiaceae	P	3	Spain	2.322222222	2.322222222		3	3.066769363	0
870	Atriplex patula	L.			Chenopodiaceae	P	3	Spain	3.527777778	2.861111111		3	7.075408484	0
871	Beta macrocarpa	Gussone			Chenopodiaceae	P	3	Spain	7.716	7.7		3	113.5139954	0
872	Chenopodium album	L.			Chenopodiaceae	P	3	Spain	1.643	1.624		2	1.554630617	0
873	Chenopodium botrys	L.			Chenopodiaceae	P	3	Spain	0.826	0.713		2	0.12742462	0
874	Chenopodium botrys	L.			Chenopodiaceae	P	3	Spain	0.932	0.932		2	0.250123149	0
875	Chenopodium murale	L.			Chenopodiaceae	P	3	Spain	1.236	1.235		2	0.611112847	0
876	Chenopodium murale	L.			Chenopodiaceae	P	3	Spain	1.445	1.344		2	0.872875322	0
877	Chenopodium vulvaria	L.			Chenopodiaceae	P	3	Spain	1.22	1.115		2	0.48377619	0
878	Chenopodium vulvaria	L.			Chenopodiaceae	P	3	Spain	1.336	1.252		2	0.685053226	0
879	Kochia scoparia	Schrader			Chenopodiaceae	P	3	Spain	1.045	0.82		2	0.216033393	0
880	Kochia scoparia	Schrader			Chenopodiaceae	P	3	Spain	1.228	0.929		2	0.331192266	0
881	Salsola kali	L.			Chenopodiaceae	P	3	Spain	2.024444444	1.82		3	1.64188724	0
882	Achillea millefolium	L.			Asteraceae	P	3	Spain	1.92375	0.5175		2	0.157031522	0
883	Achillea millefolium	L.			Asteraceae	P	3	Spain	2.425	0.64375		2	0.313269108	0
884	Anacyclus clavatus	(Desf.) Pers.			Asteraceae	P	3	Spain	2.06875	0.9125		2	0.554436954	0
885	Anacyclus clavatus	(Desf.) Pers.			Asteraceae	P	3	Spain	2.31625	1.15125		2	1.0465725	0
886	Anacyclus radiatus	Loiseleur			Asteraceae	P	3	Spain	2.92375	1.54875		2	2.781708011	0
887	Anacyclus radiatus	Loiseleur			Asteraceae	P	3	Spain	2.95	1.785		3	2.301589775	0
888	Anthemis arvensis	L.			Asteraceae	P	3	Spain	1.55625	0.6725		2	0.216403415	0
889	Anthemis arvensis	L.			Asteraceae	P	3	Spain	2.15625	1.185		2	1.030439893	0
890	Anthemis mixta	L.			Asteraceae	P	3	Spain	2.18	0.7775		2	0.416626445	0
891	Anthemis mixta	L.			Asteraceae	P	3	Spain	2.29875	1.03		2	0.80964365	0
892	Anthemis praecox	Link			Asteraceae	P	3	Spain	1.2675	0.63875		2	0.157640048	0
893	Anthemis praecox	Link			Asteraceae	P	3	Spain	1.40125	0.675		2	0.195711345	0
894	Calendula arvensis	L.			Asteraceae	P	3	Spain	12.54722222	1.511111111		3	7.019696026	0
895	Calendula arvensis	L.			Asteraceae	P	3	Spain	14.45833333	1.402777778		3	6.970618654	0
896	Centaurea calcitrapa	L.			Asteraceae	P	3	Spain	4.518518519	1.927777778		3	4.112774481	0
897	Centaurea calcitrapa	L.			Asteraceae	P	3	Spain	4.87037037	1.905555556		3	4.33153303	0
898	Centaurea cyanus	L.			Asteraceae	P	3	Spain	3.68125	1.6775		3	2.53665977	0
899	Centaurea cyanus	L.			Asteraceae	P	3	Spain	3.2875	1.66625		3	2.234971749	0
900	Chondrilla juncea	L.			Asteraceae	P	3	Spain	2.27962963	0.722222222		2	0.373755928	0
901	Chrysanthemum coronarium	L.	discolor Urv.		Asteraceae	P	3	Spain	4.41	2.1		3	4.76361161	0
902	Chrysanthemum coronarium	L.	discolor Urv.		Asteraceae	P	3	Spain	5.36	3.24		3	13.7971341	0
903	Cichorium intybus	L.			Asteraceae	P	3	Spain	2.393333333	1.241111111		2	1.288944921	0
904	Cichorium intybus	L.			Asteraceae	P	3	Spain	2.486666667	1.14		2	1.109111409	0
905	Cirsium arvense	Scopoli			Asteraceae	P	3	Spain	2.397777778	1.254444444		2	1.323853908	0
906	Cirsium arvense	Scopoli			Asteraceae	P	3	Spain	2.732222222	1.053333333		2	1.031808101	0
907	Cotula coronopifolia	L.			Asteraceae	P	3	Spain	1.05	0.75		2	0.180653321	0
908	Erigeron crispum	Pourret			Asteraceae	P	3	Spain	1.426	0.37		2	0.05862025	0
909	Erigeron crispum	Pourret			Asteraceae	P	3	Spain	1.748	0.21		2	0.023018809	0
910	Galinsoga parviflora	Cavanilles			Asteraceae	P	3	Spain	1.542	0.643		2	0.195425397	0
911	Lactuca scariola	L.			Asteraceae	P	3	Spain	2.94	0.525		2	0.250373053	0
912	Lactuca scariola	L.			Asteraceae	P	3	Spain	3.31125	0.90125		2	0.902451174	0
913	Microlonchus salmanticus	(L.) DC.			Asteraceae	P	3	Spain	4.216	1.64		3	2.776788514	0
914	Picris echioides	L.			Asteraceae	P	3	Spain	2.81125	0.80125		2	0.583015698	0
915	Podospermum laciniatum	DC.			Asteraceae	P	3	Spain	31.12	3.433333333		3	90.78015686	0
916	Senecio vulgaris	L.			Asteraceae	P	3	Spain	2.331	0.439		2	0.13650806	0
917	Senecio vulgaris	L.			Asteraceae	P	3	Spain	3.164	0.542		2	0.288746867	0
918	Silybum marianum	Gaertner			Asteraceae	P	3	Spain	7.351515152	3.410606061		3	20.98702731	0
919	Sonchus asper	Allioni			Asteraceae	P	3	Spain	2.994444444	1.039814815		2	1.111431901	0
920	Sonchus asper	Allioni			Asteraceae	P	3	Spain	3.185185185	1.242592593		2	1.805108741	0
921	Taraxacum officinale	Wigger			Asteraceae	P	3	Spain	2.467142857	0.76		2	0.452676165	0
922	Taraxacum officinale	Wigger			Asteraceae	P	3	Spain	2.63	0.455714286		2	0.16671794	0
923	Convolvulus arvensis	L.			Convolvulaceae	P	3	Spain	3.202857143	1.89		3	2.80167009	0
924	Convolvulus arvensis	L.			Convolvulaceae	P	3	Spain	3.498571429	2.211428571		3	4.190497266	0
925	Biscutella auriculata	L.			Brassicaceae	P	3	Spain	3.866086957	3.371		3	10.76872192	0
926	Brassica nigra	Koch			Brassicaceae	P	3	Spain	2.555652174	2.300869565		3	3.313359223	0
927	Capsella bursa-pastoris	(L.) Medik			Brassicaceae	P	3	Spain	1.037142857	0.593061224		2	0.110411729	0
928	Capsella bursa-pastoris	(L.) Medik			Brassicaceae	P	3	Spain	1.169387755	0.62		2	0.136594924	0
929	Conringia orientalis	(L.) Dumort			Brassicaceae	P	3	Spain	2.4	1.619736842		2	2.43375031	0
930	Conringia orientalis	(L.) Dumort			Brassicaceae	P	3	Spain	2.961842105	1.643421053		2	3.284531074	0
931	Coronopus didymus	(L.) Sm.			Brassicaceae	P	3	Spain	1.739204545	1.607954545		2	1.623697383	0
932	Coronopus didymus	(L.) Sm.			Brassicaceae	P	3	Spain	1.907954545	1.569318182		2	1.710091028	0
933	Coronopus procumbens	Gilibert			Brassicaceae	P	3	Spain	2.981415929	2.426		3	4.297726676	0
934	Chamaelina sativa	(L.) Crantz			Brassicaceae	P	3	Spain	1.706896552	0.952216749		2	0.494320695	0
935	Chamaelina sativa	(L.) Crantz			Brassicaceae	P	3	Spain	1.65320197	1.145320197		2	0.711677522	0
936	Diplotaxis erucoides	DC.			Brassicaceae	P	3	Spain	0.9218107	0.7218107		2	0.146151072	0
937	Diplotaxis erucoides	DC.			Brassicaceae	P	3	Spain	1.127160494	0.795473251		2	0.219394175	0
938	Diplotaxis virgata	(Cav.) DC.			Brassicaceae	P	3	Spain	0.940909091	0.577272727		2	0.094677534	0
939	Diplotaxis virgata	(Cav.) DC.			Brassicaceae	P	3	Spain	1.137272727	0.561818182		2	0.108621494	0
940	Eruca vesicaria	(L.) Cav.			Brassicaceae	P	3	Spain	0.251497006	0.20239521		2	0.003066627	0
941	Eruca vesicaria	(L.) Cav.			Brassicaceae	P	3	Spain	0.316766467	0.256886228		2	0.006225398	0
942	Cardaria draba	Desv.			Brassicaceae	P	3	Spain	1.63740458	1.236641221		2	0.833637275	0
943	Malcolmia africana	R. Br.			Brassicaceae	P	3	Spain	1.594545455	0.926363636		2	0.433580384	0
944	Malcolmia africana	R. Br.			Brassicaceae	P	3	Spain	1.765454545	0.923636364		2	0.480163452	0
945	Raphanus raphanistrum	L.			Brassicaceae	P	3	Spain	3.284615385	2.569230769		3	5.311029834	0
946	Raphanus raphanistrum	L.			Brassicaceae	P	3	Spain	3.269230769	3.230769231		3	8.361919386	0
947	Rapistrum rugosum	Bergeret			Brassicaceae	P	3	Spain	1.448611111	1.165277778		2	0.63992204	0
948	Rapistrum rugosum	Bergeret			Brassicaceae	P	3	Spain	1.588888889	1.165277778		2	0.707698684	0
949	Sinapis alba	L.			Brassicaceae	P	3	Spain	2.119090909	2.027272727		3	2.132526791	0
950	Sinapis alba	L.			Brassicaceae	P	3	Spain	2.327272727	2.225454545		3	2.822550066	0
951	Sinapis arvensis	L.			Brassicaceae	P	3	Spain	1.468041237	1.374226804		2	0.933488615	0
952	Sinapis arvensis	L.			Brassicaceae	P	3	Spain	1.797938144	1.778350515		3	1.392165926	0
953	Sisymbium crassifolia	Cavanilles			Brassicaceae	P	3	Spain	1.39	0.736363636		2	0.232270666	0
954	Sisymbium crassifolia	Cavanilles			Brassicaceae	P	3	Spain	1.753636364	0.937272727		2	0.491885778	0
955	Sisymbrium irio	L.			Brassicaceae	P	3	Spain	0.938	0.59		2	0.098652383	0
956	Sisymbrium irio	L.			Brassicaceae	P	3	Spain	1.045	0.625		2	0.123803696	0
957	Sisymbrium runcinatun	Lagasca			Brassicaceae	P	3	Spain	1.032727273	0.672727273		2	0.142140234	0
958	Sisymbrium runcinatun	Lagasca			Brassicaceae	P	3	Spain	1.103636364	0.736363636		2	0.183105479	0
959	Sisymbrium sophia	L.			Brassicaceae	P	3	Spain	0.814	0.521		2	0.06642787	0
960	Sisymbrium sophia	L.			Brassicaceae	P	3	Spain	1.315	0.622		2	0.155022344	0
961	Thlaspi arvense	L.			Brassicaceae	P	3	Spain	2.642	1.929		3	2.40731157	0
962	Thlaspi arvense	L.			Brassicaceae	P	3	Spain	2.95	1.83		3	2.419133598	0
963	Vogelia paniculata	(L.) Hornm			Brassicaceae	P	3	Spain	3.073333333	2.378888889		3	4.259813806	0
964	Ecbalium elaterium	Richard			Cucurbitaceae	P	3	Spain	4.16875	2.57375		3	6.765550135	0
965	Ecbalium elaterium	Richard			Cucurbitaceae	P	3	Spain	4.32375	2.80625		3	8.343741838	0
966	Cuscuta europea	L.			Convolvulaceae	P	3	Spain	1.40875	1.15125		2	0.604783886	0
967	Cuscuta europea	L.			Convolvulaceae	P	3	Spain	1.92	1.39375		2	1.306281347	0
968	Cyperus rotundus	L.			Cyperaceae	P	3	Spain	1.090946502	0.544444444		2	0.097689416	0
969	Cyperus rotundus	L.			Cyperaceae	P	3	Spain	1.136625514	0.514814815		2	0.090908894	0
970	Scabiosa maritima	L.			Dipsacaceae	P	3	Spain	3.537878788	2.937878788		3	7.481917805	0
971	Scabiosa stellata	L.			Dipsacaceae	P	3	Spain	1.43030303	1.098484848		2	0.555595091	0
972	Carex abrupta	Mack.			Cyperaceae		4	US	1.2	0.7		2	0.179828599	3
973	Carex abrupta	Mack.			Cyperaceae		4	US	1.8	1.1		2	0.715051215	3
974	Chrozophora tinctoria	Jussieu			Euphorbiaceae	P	3	Spain	5.138888889	4.05		3	20.68590193	0
975	Euphorbia chamaesyce	L.			Euphorbiaceae	P	3	Spain	1.226	0.738		2	0.204966168	0
976	Euphorbia helioscopia	L.			Euphorbiaceae	P	3	Spain	2.63	2.047		3	2.698620534	0
977	Mercurialis annua	L.			Euphorbiaceae	P	3	Spain	2.455	1.75		3	1.840910921	0
978	Fumaria officinalis	L.			Papaveraceae	P	3	Spain	1.465555556	1.378888889		2	0.938797818	0
979	Fumaria officinalis	L.			Papaveraceae	P	3	Spain	2.274444444	2.028888889		3	2.292560722	0
980	Erodium ciconium	Willdenow			Geraniaceae	P	3	Spain	10.26	2.35		3	13.89383817	0
981	Erodium cicutarium	L�H�ritier			Geraniaceae	P	3	Spain	7.830769231	1.676923077		3	5.394150677	0
982	Geranium molle	L.			Geraniaceae	P	3	Spain	2.16	1.639		2	2.202261308	0
983	Geranium molle	L.			Geraniaceae	P	3	Spain	2.241	1.513		2	1.898287926	0
984	Aegilops ovata	L.			Poaceae	P	3	Spain	4.616666667	1.772222222		3	3.551077715	0
985	Aegilops ovata	L.			Poaceae	P	3	Spain	5.761111111	2.666666667		3	10.04108209	0
986	Aegilops triuncalis	L.			Poaceae	P	3	Spain	5.705555556	1.777777778		3	4.416658088	0
987	Aegilops triuncalis	L.			Poaceae	P	3	Spain	6.883333333	1.877777778		3	5.945776703	0
988	Geranium cicutarium	L.		(= SVDS# 981)			3							0
989	Alopecurus agrestis	L.			Poaceae	P	3	Spain	3.71	1.476		2	3.328133531	0
990	Arrhenatherum bulbosum	(Willd.) H y L.			Poaceae	P	3	Spain	6.142592593	1.516666667		3	3.460369849	0
991	Arrhenatherum bulbosum	(Willd.) H y L.			Poaceae	P	3	Spain	6.874074074	1.566666667		3	4.13231418	0
992	Arrhenatherum elatius		var. bulbosus	(= SVDS# 990)			3							0
993	Scorzonera hispanica	L.	cv. G�ant Noire de Russie		Asteraceae		5	Spain	13.39	1.1	0.71	1	5.47558132	0
994	Scorzonera hispanica	L.	cv. G�ant Noire de Russie		Asteraceae		5	Spain	14.69	2.32	1.81	1	32.29884392	0
995	Arrhenatherum precatorium	P. B.		(= SVDS# 990)			3							0
996	Cynodon dactylon	Richard			Poaceae	P	3	Spain	2.5425	0.80375		2	0.526807014	0
997	Cynodon dactylon	Richard			Poaceae	P	3	Spain	2.57375	0.80625		2	0.537327066	0
998	Dactylis glomerata	L.			Poaceae	P	3	Spain	4.907368421	1.073684211		2	2.135517968	0
999	Dactylis glomerata	L.			Poaceae	P	3	Spain	5.328421053	1.104210526		2	2.529579127	0
1000	Echinochloa colona	(L.) P.B.			Poaceae	P	3	Spain	2.65625	1.52		2	2.35825674	0
1001	Echinochloa crus-galli	(L.) P.B.			Poaceae	P	3	Spain	2.7	1.9425		3	2.494740982	0
1002	Echinochloa crus-galli	(L.) P.B.			Poaceae	P	3	Spain	2.95	2.06625		3	3.084313108	0
1003	Lolium multiflorum	Lamark			Poaceae	P	3	Spain	5.091428571	1.351428571		3	2.276952717	0
1004	Paspalum dilatatum	Poiret			Poaceae	P	3	Spain	2.53	2.025		3	2.540461561	0
1005	Paspalum dilatatum	Poiret			Poaceae	P	3	Spain	2.7825	2.18		3	3.23837388	0
1006	Phalaris brachystachys	Link			Poaceae	P	3	Spain	3.506666667	1.642666667		3	2.316987272	0
1007	Phalaris minor	Retz			Poaceae	P	3	Spain	3.022222222	1.346296296		2	2.053912857	0
1008	Phalaris minor	Retz			Poaceae	P	3	Spain	3.435185185	1.557407407		2	3.460301182	0
1009	Phalaris paradoxa	L.			Poaceae	P	3	Spain	3.385185185	1.568518519		2	3.458329043	0
1010	Phalaris paradoxa	L.			Poaceae	P	3	Spain	3.603703704	1.72962963		3	2.639991971	0
1011	Poa annua	L.			Poaceae	P	3	Spain	2.511764706	0.865882353		2	0.610419389	0
1012	Poa annua	L.			Poaceae	P	3	Spain	3.567058824	0.852941176		2	0.867275695	0
1013	Setaria glauca	(L.) P.B.			Poaceae	P	3	Spain	3.053703704	1.712962963		3	2.194050585	0
1014	Setaria glauca	(L.) P.B.			Poaceae	P	3	Spain	3.435185185	1.909259259		3	3.066547805	0
1015	Setaria verticillata	(L.) P.B.			Poaceae	P	3	Spain	1.90625	1.14375		2	0.82982132	0
1016	Setaria verticillata	(L.) P.B.			Poaceae	P	3	Spain	2.16875	1.17		2	1.007862803	0
1017	Sorghum halepense	Persoon			Poaceae	P	3	Spain	4.331481481	1.905555556		3	3.852040534	0
1018	Sorghum halepense	Persoon			Poaceae	P	3	Spain	6.611111111	2.083333333		3	7.030244919	0
1019	Juncus bufonius	L.			Juncaceae	P	3	Spain	0.336625514	0.211934156		2	0.004501694	0
1020	Juncus bufonius	L.			Juncaceae	P	3	Spain	0.465432099	0.295061728		2	0.012079043	0
1021	Brunella vulgaris	L.			Lamiaceae	P	3	Spain	2.1825	1.16125		2	0.998069933	0
1022	Brunella vulgaris	L.			Lamiaceae	P	3	Spain	2.28	1.14625		2	1.018120734	0
1023	Lamium amplexicaule	L.			Lamiaceae	P	3	Spain	2.07037037	0.84537037		2	0.471152559	0
1024	Lamium amplexicaule	L.			Lamiaceae	P	3	Spain	2.627777778	1.32037037		2	1.659666163	0
1025	Salvia verbenaca	L.			Lamiaceae	P	3	Spain	3.422222222	2.288888889		3	4.391341284	0
1026	Salvia verbenaca	L.			Lamiaceae	P	3	Spain	3.972222222	3.277777778		3	10.46047466	0
1027	Stachys annua	L.			Lamiaceae	P	3	Spain	2.041	1.618		2	1.99326198	0
1028	Stachys annua	L.			Lamiaceae	P	3	Spain	2.247	1.851		3	1.885052357	0
1029	Muscari comosum	L.			Liliaceae	P	3	Spain	2.65625	2.4475		3	3.896977264	0
1030	Muscari comosum	L.			Liliaceae	P	3	Spain	3.07125	2.8		3	5.89861639	0
1031	Lythrum junceum	Banks & Solander			Lythraceae	P	3	Spain	3.981481481	1.148148148		2	1.9509451	0
1032	Lythrum junceum	Banks & Solander			Lythraceae	P	3	Spain	4.503703704	1.507407407		3	2.505943839	0
1033	Althaea cannabina	L.			Malvaceae	P	3	Spain	6.29	6.29	6.29	1	130.3018431	0
1034	Lavatera trimestris	L.			Malvaceae	P	3	Spain	2.526851852	2.276851852		3	3.207942321	0
1035	Lavatera trimestris	L.			Malvaceae	P	3	Spain	2.834259259	2.561111111		3	4.55349135	0
1036	Malva silvestris	L.			Malvaceae	P	3	Spain	1.990740741	1.967592593		3	1.887090277	0
1037	Malva silvestris	L.			Malvaceae	P	3	Spain	2.265740741	2.172222222		3	2.617971143	0
1038	Oxalis cernua	Thunberg			Oxalidaceae	P	3	Spain	1.32037037	0.866666667		2	0.308966281	0
1039	Oxalis cernua	Thunberg			Oxalidaceae	P	3	Spain	1.591666667	1.039814815		2	0.55387474	0
1040	Oxalis corniculata	L.			Oxalidaceae	P	3	Spain	1.406481481	0.95		2	0.400431727	0
1041	Oxalis corniculata	L.			Oxalidaceae	P	3	Spain	3.355555556	1.034259259		2	1.250038831	0
1042	Chelidonium majus	L.			Papaveraceae	P	3	Spain	1.514814815	0.938888889		2	0.422490797	0
1043	Chelidonium majus	L.			Papaveraceae	P	3	Spain	1.715740741	0.967592593		2	0.514390351	0
1044	Glaucium corniculatum	Curtis			Papaveraceae	P	3	Spain	1.42037037	1.15462963		2	0.614066473	0
1045	Glaucium corniculatum	Curtis			Papaveraceae	P	3	Spain	1.685185185	1.312962963		2	0.983599484	0
1046	Hypecoum procumbens	L.			Papaveraceae	P	3	Spain	1.15125	1.05875		2	0.407488213	0
1047	Hypecoum procumbens	L.			Papaveraceae	P	3	Spain	1.30625	1.04625		2	0.454315046	0
1048	Papaver hybridum	L.			Papaveraceae	P	3	Spain	0.687037037	0.473148148		2	0.04609477	0
1049	Papaver hybridum	L.			Papaveraceae	P	3	Spain	0.755555556	0.576851852		2	0.07569498	0
1050	Papaver rhoeas	L.			Papaveraceae	P	3	Spain	0.591666667	0.37962963		2	0.02547231	0
1051	Papaver rhoeas	L.			Papaveraceae	P	3	Spain	0.850925926	0.672222222		2	0.116491733	0
1052	Roemeria hybrida	D.C.			Papaveraceae	P	3	Spain	0.953703704	0.482407407		2	0.066728612	0
1053	Roemeria hybrida	D.C.			Papaveraceae	P	3	Spain	1.228703704	0.575925926		2	0.123601711	0
1054	Coronilla scorpioides	Koch			Fabaceae	P	3	Spain	4.312962963	1.366666667		2	3.314014537	0
1055	Coronilla scorpioides	Koch			Fabaceae	P	3	Spain	4.935185185	1.538888889		3	2.862048442	0
1056	Hedysarum coronarium	L.			Fabaceae	P	3	Spain	6.227777778	5.166666667		3	40.89813999	0
1057	Lathyrus aphaca	L.			Fabaceae	P	3	Spain	2.838888889	2.288888889		3	3.642486364	0
1058	Lathyrus aphaca	L.			Fabaceae	P	3	Spain	3.561111111	2.966666667		3	7.679548028	0
1059	Lathyrus ochrus	L.			Fabaceae	P	3	Spain	5.726	5.458		3	41.96851402	0
1060	Lathyrus ochrus	L.			Fabaceae	P	3	Spain	5.886	5.082		3	37.38145858	0
1061	Lotus corniculatus	L.			Fabaceae	P	3	Spain	1.137037037	1.12962963		2	0.461437968	0
1062	Lotus corniculatus	L.			Fabaceae	P	3	Spain	1.618518519	1.232407407		2	0.816797805	0
1063	Lupinus angustifolius	L.			Fabaceae	P	3	Spain	6.538	5.302		3	45.23757312	0
1064	Lupinus luteus	L.			Fabaceae	P	3	Spain	8.76	6.304		3	86.10271778	0
1065	Lupinus angustifolius	L.			Fabaceae	P	3	Spain	6.138	5.33		3	42.90770409	0
1066	Lupinus luteus	L.			Fabaceae	P	3	Spain	8.69	6.092		3	79.70624724	0
1067	Medicago arabica	Allioni			Fabaceae	P	3	Spain	1.805555556	1.272222222		2	0.990185952	0
1068	Medicago arabica	Allioni			Fabaceae	P	3	Spain	2.277777778	1.338888889		2	1.450503796	0
1069	Medicago sativa	L.			Fabaceae	P	3	Spain	5.565	2.885		3	11.35435873	0
1070	Medicago sativa	L.			Fabaceae	P	3	Spain	6.438333333	3.415		3	18.42177501	0
1071	Melilotus indica	Allioni			Fabaceae	P	3	Spain	2.165740741	1.712037037		3	1.554257052	0
1072	Melilotus indica	Allioni			Fabaceae	P	3	Spain	2.361111111	1.812962963		3	1.900214358	0
1073	Ornithopus compresus	L.			Fabaceae	P	3	Spain	4.502777778	3.134722222		3	10.8457034	0
1074	Ornithopus compresus	L.			Fabaceae	P	3	Spain	4.788888889	3.518055556		3	14.53492989	0
1075	Carex albonigra	Mack.			Cyperaceae		4	US	1.3	0.7		2	0.195255526	3
1076	Scorpiurus subvillosus	L.			Fabaceae	P	3	Spain	5.135714286	2.371428571		3	7.076228426	0
1077	Scorpiurus subvillosus	L.			Fabaceae	P	3	Spain	5.964285714	2.442857143		3	8.722119739	0
1078	Tetragonolobus purpureus	Moench			Fabaceae	P	3	Spain	5.322	5.322	5.322	1	78.92657061	0
1079	Tetragonolobus purpureus	Moench			Fabaceae	P	3	Spain	5.68	5.322		3	39.57114807	0
1080	Tetragonolobus siliquosus	Roth			Fabaceae	P	3	Spain	2.26	2.045555556		3	2.315587506	0
1081	Tetragonolobus siliquosus	Roth			Fabaceae	P	3	Spain	2.734444444	2.287777778		3	3.50501317	0
1082	Trifolium angustifolium	L.			Fabaceae	P	3	Spain	2.447368421	1.527368421		2	2.159412847	0
1083	Trifolium angustifolium	L.			Fabaceae	P	3	Spain	2.48	1.635789474		2	2.596815378	0
1084	Vicia sativa	L.			Fabaceae	P	3	Spain	3.733333333	3.566666667		3	11.64240633	0
1085	Vicia sativa	L.			Fabaceae	P	3	Spain	4.811111111	4.7		3	26.09873174	0
1086	Plantago lanceolata	L.			Plantaginaceae	P	3	Spain	2.838888889	1.822222222		3	2.308239589	0
1087	Plantago lanceolata	L.			Plantaginaceae	P	3	Spain	4.033333333	2.372222222		3	5.560014864	0
1088	Polygonum aviculare	L.			Polygonaceae	P	3	Spain	2.357407407	1.316666667		2	1.452002927	0
1089	Polygonum convolvulus	L.			Polygonaceae	P	3	Spain	3.42625	2.445		3	5.017059911	0
1090	Polygonum convolvulus	L.			Polygonaceae	P	3	Spain	3.82375	2.31125		3	5.003283646	0
1091	Polygonum lapathifolium	L.			Polygonaceae	P	3	Spain	3.326744186	2.384883721		3	4.634535295	0
1092	Polygonum lapathifolium	L.			Polygonaceae	P	3	Spain	3.430232558	2.615116279		3	5.746673143	0
1093	Polygonum persicaria	L.			Polygonaceae	P	3	Spain	2.703488372	2.147674419		3	3.053728999	0
1094	Rumex crispus	L.			Polygonaceae	P	3	Spain	2.277777778	1.518518519		2	1.952621705	0
1095	Carex albonigra	Mack.			Cyperaceae		4	US	1.9	1.3		2	1.101078487	3
1096	Carex alma	L.H. Bailey			Cyperaceae		4	US	1.5	0.9		2	0.382353074	3
1097	Portulaca oleracea	L.			Portulacaceae	P	3	Spain	0.804444444	0.578888889		2	0.0812323	0
1098	Portulaca oleracea	L.			Portulacaceae	P	3	Spain	1.156666667	1.014444444		2	0.374172101	0
1099	Anagallis arvensis	L.			Primulaceae	P	3	Spain	1.334156379	0.928806584		2	0.361155632	0
1100	Adonis aestivalis	L.			Ranunculaceae	P	3	Spain	4.362962963	2.651851852		3	7.517685628	0
1101	Delphinium peregrinum	L.			Ranunculaceae	P	3	Spain	1.768518519	1.597222222		2	1.630051788	0
1102	Nigella arvensis	L.			Ranunculaceae	P	3	Spain	2.588421053	1.815789474		3	2.089701268	0
1103	Nigella arvensis	L.			Ranunculaceae	P	3	Spain	2.890526316	1.922105263		3	2.615033431	0
1104	Nigella damascena	L.			Ranunculaceae	P	3	Spain	2.855555556	1.748148148		3	2.136819612	0
1105	Nigella hispanica	L.			Ranunculaceae	P	3	Spain	1.013731364	1.013731364	1.013731364	2	1.013731364	0
1106	Nigella hispanica	L.			Ranunculaceae	P	3	Spain	2.376842105	1.405263158		2	1.707883752	0
1107	Ranunculus arvensis	L.			Ranunculaceae	P	3	Spain	5.388888889	3.805555556		3	19.14917514	0
1108	Ranunculus arvensis	L.			Ranunculaceae	P	3	Spain	5.416666667	3.527777778		3	16.53530729	0
1109	Ranunculus muricatus	L.			Ranunculaceae	P	3	Spain	6.527777778	4.777777778		3	36.63914082	0
1110	Ranunculus muricatus	L.			Ranunculaceae	P	3	Spain	6.25	4.444444444		3	30.33293003	0
1111	Ranunculus sardous	L.			Ranunculaceae	P	3	Spain	3.064	2.251		3	3.802316711	0
1112	Ranunculus sardous	L.			Ranunculaceae	P	3	Spain	3.236	2.432		3	4.688034948	0
1113	Reseda luteola	L.			Resedaceae	P	3	Spain	0.771296296	0.771296296	0.771296296	1	0.240249427	0
1114	Reseda luteola	L.			Resedaceae	P	3	Spain	0.956481481	0.850925926		2	0.212831242	0
1115	Reseda phyteuma	L.			Resedaceae	P	3	Spain	1.9275	1.2875		2	1.094920709	0
1116	Reseda phyteuma	L.			Resedaceae	P	3	Spain	2.15625	0.9325		2	0.607536903	0
1117	Agrimonia eupatoria	L.			Rosaceae	P	3	Spain	6.194444444	4.044444444		3	24.87910012	0
1118	Agrimonia eupatoria	L.			Rosaceae	P	3	Spain	8.638888889	5.761111111		3	70.78892528	0
1119	Sanguisorba minor	Scopoli			Rosaceae	P	3	Spain	6.272222222	3.972222222		3	24.29812114	0
1120	Sanguisorba minor	Scopoli			Rosaceae	P	3	Spain	6.755555556	4.511111111		3	33.79152841	0
1121	Asperula arvensis	L.			Rubiaceae	P	3	Spain	2.4475	2.15875		3	2.793076082	0
1122	Asperula arvensis	L.			Rubiaceae	P	3	Spain	2.55875	2.2875		3	3.278921544	0
1123	Galium aparine	L.			Rubiaceae	P	3	Spain	3.18125	3.17625	3.17625	1	16.80450708	0
1124	Galium tricorne	Withering			Rubiaceae	P	3	Spain	3.69	3.4375		3	10.68765829	0
1125	Galium tricorne	Withering			Rubiaceae	P	3	Spain	3.7025	3.69		3	12.3596567	0
1126	Linaria latifolia	Desfontaines			Scrophulariaceae	P	3	Spain	2.45	1.71875		3	1.77211973	0
1127	Linaria spuria	Miller			Scrophulariaceae	P	3	Spain	0.856481481	0.572222222		2	0.084549489	0
1128	Linaria spuria	Miller			Scrophulariaceae	P	3	Spain	0.946296296	0.681481481		2	0.133482732	0
1129	Veronica arvensis	L.			Scrophulariaceae	P	3	Spain	1.047222222	0.773148148		2	0.191781866	0
1130	Veronica arvensis	L.			Scrophulariaceae	P	3	Spain	1.311111111	0.940740741		2	0.364250203	0
1131	Veronica hederaefolia	L.			Scrophulariaceae	P	3	Spain	2.536111111	2.086111111		3	2.702674535	0
1132	Veronica hederaefolia	L.			Scrophulariaceae	P	3	Spain	3.107407407	2.631481481		3	5.270899182	0
1133	Datura stramonium	L.			Solanaceae	P	3	Spain	3.529473684	2.682105263		3	6.220100858	0
1134	Datura stramonium	L.			Solanaceae	P	3	Spain	3.857894737	2.874736842		3	7.812070732	0
1135	Solanum nigrum	L.			Solanaceae	P	3	Spain	2.152777778	1.593518519		2	2.048817256	0
1136	Solanum nigrum	L.			Solanaceae	P	3	Spain	2.257407407	1.789814815		3	1.770629185	0
1137	Ammi majus	L.			Apiaceae	P	3	Spain	2.195	1.0275		2	0.765378062	0
1138	Ammi majus	L.			Apiaceae	P	3	Spain	2.67875	1.1575		2	1.249876976	0
1139	Ammi visnaga	Lamk			Apiaceae	P	3	Spain	2.05375	1.03875		2	0.72871698	0
1140	Ammi visnaga	Lamk			Apiaceae	P	3	Spain	2.15125	1.04875		2	0.783100262	0
1141	Bifora testiculata	DC.			Apiaceae	P	3	Spain	3.587012987	3.551948052		3	11.09323593	0
1142	Bifora testiculata	DC.			Apiaceae	P	3	Spain	4.071428571	3.985714286		3	15.863596	0
1143	Bupleurum rotundifolium	L.			Apiaceae	P	3	Spain	3.07625	1.54875		2	2.96495208	0
1144	Bupleurum rotundifolium	L.			Apiaceae	P	3	Spain	3.4475	1.29875		2	2.208089672	0
1145	Carex alma	L.H. Bailey			Cyperaceae		4	US	2.5	1.8		3	1.98334245	3
1146	Coriandrum sativum	L.			Apiaceae	P	3	Spain	7.555555556	4.138888889		3	31.80608095	0
1147	Coriandrum sativum	L.			Apiaceae	P	3	Spain	6.638888889	6.083333333		3	60.58257496	0
1148	Daucus carota	L.			Apiaceae	P	3	Spain	3.70625	1.75		3	2.77949218	0
1149	Daucus carota	L.			Apiaceae	P	3	Spain	3.175	1.7		3	2.246819313	0
1150	Daucus maximus	Desfontaines			Apiaceae	P	3	Spain	2.775	1.8875		3	2.420876628	0
1151	Daucus maximus	Desfontaines			Apiaceae	P	3	Spain	2.38125	1.625		2	2.429697193	0
1152	Carex amplifolia	Boott			Cyperaceae		4	US	1.4	1		2	0.44423253	3
1153	Foeniculum vulgare	Gaertner			Apiaceae	P	3	Spain	6.20125	1.6825		3	4.29956099	0
1154	Foeniculum vulgare	Gaertner			Apiaceae	P	3	Spain	6.3325	1.9375		3	5.823359216	0
1155	Ridolfia segetum	Moris			Apiaceae	P	3	Spain	2.15625	0.7725		2	0.406239299	0
1156	Ridolfia segetum	Moris			Apiaceae	P	3	Spain	2.54875	1.54875		2	2.347195365	0
1157	Scandix pecten-veneris	L.			Apiaceae	P	3	Spain	56.28888889	1.666666667		3	38.45409992	0
1158	Scandix pecten-veneris	L.			Apiaceae	P	3	Spain	69.71111111	2.522222222		3	109.9932307	0
1159	Torilis anthriscus	Gmelin			Apiaceae	P	3	Spain	3.445	1.29		2	2.170191938	0
1160	Torilis anthriscus	Gmelin			Apiaceae	P	3	Spain	4.33625	1.775		3	3.345765614	0
1161	Carex amplifolia	Boott			Cyperaceae		4	US	2	1.5		2	1.625080035	3
1162	Carex angustata	Boott			Cyperaceae		4	US	1	0.7		2	0.149178381	3
1163	Carex angustata	Boott			Cyperaceae		4	US	1.5	1.3		2	0.845049106	3
1164	Urtica dioica	L.			Urticaceae	P	3	Spain	1.413888889	0.938888889		2	0.392774541	0
1165	Urtica dioca	L.			Urticaceae	P	3	Spain	1.786111111	1.425		2	1.265025122	0
1166	Fedia cornucopiae	Gaertner			Valerianaceae	P	3	Spain	4.250746269	3.814925373		3	15.1720231	0
1167	Fedia cornucopiae	Gaertner			Valerianaceae	P	3	Spain	4.728358209	4.128358209		3	19.7748226	0
1168	Verbena officinalis	L.			Verbenaceae	P	3	Spain	1.978703704	0.773148148		2	0.37167696	0
1169	Verbena officinalis	L.			Verbenaceae	P	3	Spain	2.059259259	0.751851852		2	0.365484559	0
1170	Carex aquatilis	Wahlenb.			Cyperaceae		4	US	1	0.7		2	0.149178381	3
1171	Carex aquatilis	Wahlenb.			Cyperaceae		4	US	1.8	1.6		2	1.671116669	3
1172	Zygophyllum fabago	L.			Zygophyllaceae	P	3	Spain	4.594444444	2.461111111		3	6.818090436	0
1173	Zygophyllum fabago	L.			Zygophyllaceae	P	3	Spain	5.177777778	2.666666667		3	9.023274519	0
1174	Amaranthus spicatus	Lam.		(= SVDS# 823)			3							0
1175	Amaranthus strictus	Ten.		(= SVDS# 823)			3							0
1176	Pyryxidium retroflexum	Montand.		(= SVDS# 823)			3							0
1177	Anchusa angustifolia	L.		(= SVDS# 835)			3							0
1178	Buglossum elatum	Moench.		(= SVDS# 835)			3							0
1179	Anchusa italica	Retzius.		(= SVDS# 835)			3							0
1180	Rhytispermum arvense	Link.		(= SVDS# 847)			3							0
1181	Lychnis githago	Scop.		(= SVDS# 851)			3							0
1182	Silene githago	Clairv.		(= SVDS# 851)			3							0
1183	Githago segetum	Desf.		(= SVDS# 851)			3							0
1184	Lychnis segetum	Lam.		(= SVDS# 851)			3							0
1185	Silene cucubalus	Wibel		(= SVDS# 857)			3							0
1186	Silene vulgaris	Garcke		(= SVDS# 857)			3							0
1187	Cucubalus behen	L.		(= SVDS# 857)			3							0
1188	Cucubalus inflatus	Salisb.		(= SVDS# 857)			3							0
1189	Silene venosa	Aschers		(= SVDS# 857)			3							0
1190	Cucubalus venosus	Gilib		(= SVDS# 857)			3							0
1191	Behen vulgaris	Moench		(= SVDS# 857)			3							0
1192	Alsine arvensis	Crantz		(= SVDS# 859)			3							0
1193	Alsine media	L.		(= SVDS# 863)			3							0
1194	Alsine aviculorum	Lam.		(= SVDS# 863)			3							0
1195	Cerastium medium	Crantz		(= SVDS# 863)			3							0
1196	Vaccaria vulgaris	Host.		(= SVDS# 865)			3							0
1197	Vaccaria segetatis	Garcke,		(= SVDS# 865)			3							0
1198	Saponaria vaccaria	L.		(= SVDS# 865)			3							0
1199	Atriplex latifolis	Wahlbg		(= SVDS# 867)			3							0
1200	Atriplex hastaefolia	Salisb		(= SVDS# 867)			3							0
1201	Atriplex spinacifolia	Stokes		(= SVDS# 867)			3							0
1202	Chenopodium hastatum	Dumortier		(= SVDS# 867)			3							0
1203	Schizotheca hastata	Fourreau		(= SVDS# 867)			3							0
1204	Atriplex angustifolia	Smith		(= SVDS# 869)			3							0
1205	Schizotheca patula	Fourreau		(= SVDS# 869)			3							0
1206	Teutliopsis patula	Celakowski		(= SVDS# 869)			3							0
1207	Atriplex latifolia	Wahlbg		(= SVDS# 869)			3							0
1208	Atriplex spinacifolia	Stokes		(= SVDS# 869)			3							0
1209	Chenopodium hastatum	Dumortier		(= SVDS# 869)			3							0
1210	Schizotheca hastata	Fourreau		(= SVDS# 869)			3							0
1211	Atriplex alba	Crantz		(= SVDS# 872)			3							0
1212	Chenopodium leliospermum	DC.		(= SVDS# 872)			3							0
1213	Chenopodium olidum	Curt.		(= SVDS# 877)			3							0
1214	Chenopodium foetidum	Lam.		(= SVDS# 877)			3							0
1215	Anacyclus tormentus	(Govan) DC.		(= SVDS# 884)			3							0
1216	Chamaemelum arvense	All.		(= SVDS# 888)			3							0
1217	Serratula arvensis	L.		(= SVDS# 905)			3							0
1218	Carduus arvensis	Sm.		(= SVDS# 905)			3							0
1219	Cnicus arvensis	Bernh.		(= SVDS# 905)			3							0
1220	Lactuca silvestris	Lam.		(= SVDS# 911)			3							0
1221	Helminthia echioides	Gaertn.		(= SVDS# 914)			3							0
1222	Taraxacum dens-leonis	Desf.		(= SVDS# 921)			3							0
1223	Leontodon officinalis	With.		(= SVDS# 921)			3							0
1224	Thlaspi bursa-pastoris	L.		(= SVDS# 927)			3							0
1225	Senebiera pinnatifida	DC.		(= SVDS# 931)			3							0
1226	Senebiera coronopus	Poir.		(= SVDS# 933)			3							0
1227	Lepidium draba	L.		(= SVDS# 942)			3							0
1228	Brassica sinapis	Vis.		(= SVDS# 951)			3							0
1229	Brassica sinapistrum	Boiss.		(= SVDS# 951)			3							0
1230	Sinapistrum arvense	Spach.		(= SVDS# 951)			3							0
1231	Descurainia sophia	(L.) Webb.		(= SVDS# 959)			3							0
1232	Neslia paniculata	Desv.		(= SVDS# 963)			3							0
1233	Myagrum paniculatum	L.		(= SVDS# 963)			3							0
1234	Vogelia sagittata	Medik.		(= SVDS# 963)			3							0
1235	Rapistrum paniculatum	Gaertn.		(= SVDS# 963)			3							0
1236	Alyssum paniculatum	Willd.		(= SVDS# 963)			3							0
1237	Bunias paniculata	L�H�rit.		(= SVDS# 963)			3							0
1238	Tithymalus helioscopius	Lam.		(= SVDS# 976)			3							0
1239	Geranium cicutarium	L.		(= SVDS# 981)			3							0
1240	Agropyrum repens	(L.) P.B.		(= SVDS# 988)			3							0
1241	Triticum repens	L.		(= SVDS# 988)			3							0
1242	Alopecurus myosuroides	Huds.		(= SVDS# 989)			3							0
1243	Carex arapahoensis	Clokey			Cyperaceae		4	US	1.6	1		2	0.512217669	3
1244	Carex arapahoensis	Clokey			Cyperaceae		4	US	2.1	1.5		2	1.721361805	3
1245	Avena bulbosa	Will.		(= SVDS# 990)			3							0
1246	Avena precatoria	Thuil		(= SVDS# 990)			3							0
1247	Digitaria sanguinalis	(L.) Scopoli			Poaceae	P	3	Spain	2.14875	0.7825		2	0.415913246	0
1248	Panycum sanguinale	L.		(= SVDS# 1247)			3							0
1249	Dactylon sanguinale	Vill.		(= SVDS# 1247)			3							0
1250	Paspalum sanguinale	Lam.		(= SVDS# 1247)			3							0
1251	Panicum colona	L.		(= SVDS# 1000)			3							0
1252	Panicum crus-galli	L.		(= SVDS# 1001)			3							0
1253	Panicum glaucum	L.		(= SVDS# 1013)			3							0
1254	Panicum flavescens	Moench.		(= SVDS# 1013)			3							0
1255	Pennisetum glaucum	R. Br.		(= SVDS# 1013)			3							0
1256	Panicum verticillatum	L.		(= SVDS# 1015)			3							0
1257	Panicum asperum	Lam.		(= SVDS# 1015)			3							0
1258	Pennisetum verticillatum	R. Br.		(= SVDS# 1015)			3							0
1259	Setaria viridis	(L.) P.B.			Poaceae	P	3	Spain	2.57125	1.40875		2	1.886267545	0
1260	Setaria viridis	(L.) P.B.			Poaceae	P	3	Spain	2.81625	1.66125		2	3.166236239	0
1261	Panicum viride	L.		(= SVDS# 1260)			3							0
1262	Panicum bicolor	Moench		(= SVDS# 1260)			3							0
1263	Pennisetum viride	R. Br.		(= SVDS# 1260)			3							0
1264	Juncus divaricatus	Gilib		(= SVDS# 1019)			3							0
1265	Juncus ranarius	Nees.		(= SVDS# 1019)			3							0
1266	Galeobdolom amplexicaule	Moench.		(= SVDS# 1023)			3							0
1267	Pollichia amplexicaulis	Willd.		(= SVDS# 1023)			3							0
1268	Hyacinthus comosus	L.		(= SVDS# 1029)			3							0
1269	Bellevalia comosa	Kunth.		(= SVDS# 1029)			3							0
1270	Oxalis pes-capeae	L.		(= SVDS# 1038)			3							0
1271	Oxalis lybica			(= SVDS# 1038)			3							0
1272	Papaver hispidum	Lmk.		(= SVDS# 1048)			3							0
1273	Roemeria violacea	Medik.		(= SVDS# 1052)			3							0
1274	Medicago maculata	Sibth.		(= SVDS# 1067)			3							0
1275	Medicago cordata	Lam.		(= SVDS# 1067)			3							0
1276	Melilotus parviflora	Dest.		(= SVDS# 1071)			3							0
1277	Tetragonolobus tetragonolobus	L.		(= SVDS# 1078)			3							0
1278	Vicia communis	Rouy		(= SVDS# 1084)			3							0
1279	Fagopyrum carinatum	Moench.		(= SVDS# 1089)			3							0
1280	Tinitaria convulvulus	Webb & Berth.		(= SVDS# 1089)			3							0
1281	Bilderdykia convulvulus	Dum.		(= SVDS# 1089)			3							0
1282	Polygonum volubile	Gilibert.		(= SVDS# 1089)			3							0
1283	Lapathum crispum	Scop.		(= SVDS# 1094)			3							0
1284	Aparine hispida	Moench.		(= SVDS# 1123)			3							0
1285	Valantia tricornis	Roth		(= SVDS# 1124)			3							0
1286	Valantia triflora	Lam.		(= SVDS# 1124)			3							0
1287	Antirrhinum spurium	L.		(= SVDS# 1127)			3							0
1288	Elatinoides spuria	Westtst.		(= SVDS# 1127)			3							0
1289	Kickxia spuria			(= SVDS# 1127)			3							0
1290	Daucus platycarpos	Scop.		(= SVDS# 1145)			3							0
1291	Daucus communis	Rouy y Camus		(= SVDS# 1148)			3							0
1292	Myrrhis pecten-veneris	All.		(= SVDS# 1157)			3							0
1293	Chaerophyllum pecten-veneris	Crantz		(= SVDS# 1157)			3							0
1294	Chaerophyllum rostratum	Lam.		(= SVDS# 1157)			3							0
1295	Potamogeton crispus	L.			Potamogetonaceae	D	6	US	5.8125	2.6175		3	9.76019253	0
1296	Potamogeton foliosus	Raf.			Potamogetonaceae	D	6	US	2.674	2.044		3	2.735744463	0
1297	Potamogeton nodosus	Poir.			Potamogetonaceae	D	6	US	3.77	2.706666667	1.793333333	1	9.58154995	0
1298	Potamogeton pusillus	L.			Potamogetonaceae		6	US	1.9	1		2	0.616315698	0
1299	Potamogeton richardsonii	(A. Benn.) Rydb.			Potamogetonaceae		6	US	2.5	2.3		3	3.238728382	0
1300	Potamogeton richardsonii	(A. Benn.) Rydb.			Potamogetonaceae		6	US	4	2.3		3	5.183187528	0
1301	Najas flexilis	(Willd.) Rostk. Schmidt			Najadaceae	D	6	US	2.71	0.9		2	0.721195845	0
1302	Najas guadelupensis	(Spreng.) Magnus			Najadaceae	D	6	US	2.594666667	0.841333333		2	0.594108982	0
1303	Sagittaria latifolia	Willd.			Alismataceae		6	US	2.3	1.5		2	1.918218992	0
1304	Sagittaria latifolia	Willd.			Alismataceae		6	US	4	3		3	8.822165999	0
1305	Elodea canadensis	Michx.			Hydrocharitaceae	D	6	US	5.3325	1.0775		2	2.383764039	0
1306	Elodea canadensis	Michx.			Hydrocharitaceae	D	6	US	5.865	1.0875		2	2.743761901	0
1307	Bromus commutatus	Schrad.			Poaceae	D	6	US	3.8275	1.0875		2	1.636395227	0
1308	Bromus japonicus	Thunb.			Poaceae	D	6	US	4.514	0.854		2	1.132675032	0
1309	Bromus secalinus	L.			Poaceae	D	6	US	4.486666667	1.476666667		3	2.395648894	0
1310	Cenchrus echinatus	L.			Poaceae		6	US	1.6	1.3		2	0.907845282	0
1311	Cenchrus echinatus	L.			Poaceae		6	US	3.2	2.2		3	3.79317951	0
1312	Cenchrus incertus	M. A. Curtis			Poaceae	D	6	US	2.243333333	1.56		2	2.045574271	0
1313	Cenchrus longispinus	(Hack.) Fern.			Poaceae		6	US	2.2	1.5		2	1.819074791	0
1314	Cenchrus longispinus	(Hack.) Fern.			Poaceae		6	US	3.8	2.6		3	6.293177488	0
1315	Digitaria sanguinalis	(L.) Scop.			Poaceae	D	6	US	1.401666667	0.531666667		2	0.120098626	0
1316	Eleusine indica	(L.) Gaertn.			Poaceae	D	6	US	0.976	0.496		2	0.072252799	0
1317	Hordeum jubatum	L.			Poaceae	D	6	US	3.454	1.428		2	2.796771581	0
1318	Paspalum dilatatum	Poir.			Poaceae	D	6	US	2.032	1.864		3	1.728680702	0
1319	Panicum dichotomiflorum	Michx.			Poaceae	D	6	US	2.176	0.984	0.613333333	1	0.687621077	0
1320	Paspalum distichum	L.			Poaceae	D	6	US	2.856	1.422		2	2.189633719	0
1321	Phalaris arundinacea	L.			Poaceae		6	US	3	0.7		2	0.467898696	0
1322	Phalaris arundinacea	L.			Poaceae		6	US	4.2	1.5		3	2.313992382	0
1323	Setaria faberi	Herrm.			Poaceae	D	6	US	2.634	1.868	1.03	1	2.653557419	0
1324	Sorghum halepense	(L.) Pers.			Poaceae	D	6	US	2.898	1.678	1.266	1	3.223462822	0
1325	Sporobolus poiretii	(Roem. & Schult.) Hitchc.			Poaceae	D	6	US	1.131	0.321		2	0.034864691	0
1326	Sporobolus poiretii	(Roem. & Schult.) Hitchc.			Poaceae	D	6	US	1.045	0.527		2	0.087538728	0
1327	Carex lasiocarpa	Ehrh.			Cyperaceae	D	6	US	1.344	0.513		2	0.107000708	0
1328	Carex lanuginosa	Michx.		(= SVDS# 1327)			6							0
1329	Carex nebraskensis	Dewey			Cyperaceae	D	6	US	1.512	0.546666667		2	0.137320979	0
1330	Cyperus esculentus	L.	latifolia (Boeckl.) Gilly		Cyperaceae	D	6	US	1.531	0.723		2	0.247157569	0
1331	Cyperus rotundus	L.			Cyperaceae	D	6	US	1.15	0.728		2	0.186583408	0
1332	Scirpus acutus	Muhl.			Cyperaceae	D	6	US	2.428	1.69	1.06	1	2.277402928	0
1333	Heteranthera dubia	(Jacq.) MacM.			Pontederiaceae	D	6	US	0.84	0.61		2	0.094374803	0
1334	Heteranthera dubia	(Jacq.) MacM.			Pontederiaceae	D	6	US	0.726	0.53		2	0.061261999	0
1335	Zosterella dubia	(Jacq.) Small		(= SVDS# 1333)			6							0
1336	Cannabis sativa	L.			Cannabinaceae	D	6	US	3.756666667	3.106666667		3	8.885216538	0
1337	Urtica dioica	L.			Urticaceae	D	6	US	1.629333333	0.973333333	0.574666667	1	0.477184324	0
1338	Brunnichia cirrhosa	Gaertn.			Polygonaceae	D	6	US	11.715	3.14		3	28.3725687	0
1339	Brunnichia cirrhosa	Gaertn.			Polygonaceae	D	6	US	12.645	3.565		3	39.52904179	0
1340	Polygonum amphibium	L.			Polygonaceae	D	6	US	4.79	3.07		3	11.06631274	0
1341	Polygonum aviculare	L.			Polygonaceae	D	6	US	2.44	1.497333333		2	2.050601324	0
1342	Polygonum aviculare	L.	stipulaceum (Coleman) Fern.		Polygonaceae	D	6	US	2.6	1.657333333		2	2.845687185	0
1343	Polygonum coccineum	Muhl.			Polygonaceae	D	6	US	7.595	5.655		3	59.88611583	0
1344	Polygonum hydropiper	L.			Polygonaceae	D	6	US	2.494	1.864		3	2.121818602	0
1345	Polygonum hydropiper	L.			Polygonaceae	D	6	US	2.852	1.888		3	2.489389546	0
1346	Polygonum pensylvanicum	L.			Polygonaceae	D	6	US	3.36	2.56	0.855	1	3.85073808	0
1347	Polygonum persicaria	L.			Polygonaceae	D	6	US	2.902	2.284	0.642	1	2.228061417	0
1348	Rumex crispus	L.			Polygonaceae	D	6	US	2.432	1.492		2	2.025004053	0
1349	Chenopodium album	L.			Chenopodiaceae		6	US	1.3	1.3	1.3	1	1.15034651	0
1350	Chenopodium album	L.			Chenopodiaceae		6	US	1.5	1.5	1.5	1	1.767145868	0
1351	Halogeton glomeratus	(M. Bieb.) C. A. Mey.			Chenopodiaceae	D	6	US	2.083333333	1.545	0.711666667	1	1.199395716	0
1352	Kochia scoparia	(L.) Roth			Chenopodiaceae	D	6	US	1.353333333	1.055	0.433333333	1	0.323949981	0
1353	Salsola kali	L.			Chenopodiaceae	D	6	US	1.438	0.66		2	0.191910249	0
1354	Salsola kali	L.			Chenopodiaceae	D	6	US	1.636	1.048		2	0.580227716	0
1355	Salsola pestifer	A.Nels.		(= SVDS# 1354)			6							0
1356	Alternanthera philoxeroides	(Mart.) Griseb.	tenuifolia Tausch		Amaranthaceae	D	6	US	1.422	0.858		2	0.326940952	0
1357	Alternanthera philoxeroides	(Mart.) Griseb.	tenuifolia Tausch		Amaranthaceae	D	6	US	1.656	0.858		2	0.383709851	0
1358	Amaranthus albus	L.			Amaranthaceae	D	6	US	1.731666667	1.521666667	1.036666667	1	1.430281696	0
1359	Amaranthus blitoides	S. Wats.			Amaranthaceae	D	6	US	1.88	1.678		2	1.971004023	0
1360	Amaranthus retroflexus	L.			Amaranthaceae	D	6	US	1.74	1.443333333		2	1.26417125	0
1361	Amaranthus retroflexus	L.			Amaranthaceae	D	6	US	1.773333333	1.056666667		2	0.644506828	0
1362	Phytolacca americana	L.			Phytolaccaceae	D	6	US	4.1	3.72	2.472	1	19.74121531	0
1363	Phytolacca decandra	L.		(= SVDS# 1362)			6							0
1364	Mollugo verticillata	L.			Aizoaceae	D	6	US	1.37	1.211666667	0.7	1	0.608415669	0
1365	Portulaca oleracea	L.			Portulacaceae	D	6	US	0.577222222	0.461666667	0.233333333	1	0.032557194	0
1366	Agrostemma githago	L.			Caryophyllaceae		6	US	2	2	2	1	4.188790205	0
1367	Agrostemma githago	L.			Caryophyllaceae		6	US	3	3	3	1	14.13716694	0
1368	Cerastium arvense	L.			Caryophyllaceae	D	6	US	0.711	0.635		2	0.086458527	0
1369	Cerastium arvense	L.			Caryophyllaceae	D	6	US	0.81	0.728		2	0.130326166	0
1370	Cerastium vulgatum	L.			Caryophyllaceae	D	6	US	0.622666667	0.549333333		2	0.056403046	0
1371	Lychnis alba	Mill.			Caryophyllaceae	D	6	US	2.068333333	1.725		3	1.506906487	0
1372	Scleranthus annuus	L.			Caryophyllaceae	D	6	US	1.682	1.072		2	0.627896279	0
1373	Scleranthus annuus	L.			Caryophyllaceae	D	6	US	1.83	1.068		2	0.682612675	0
1374	Silene noctiflora	L.			Caryophyllaceae	D	6	US	1.374666667	1.253333333	0.684	1	0.617047669	0
1375	Spergula arvensis	L.			Caryophyllaceae	D	6	US	0.925	0.839	0.629	1	0.255595358	0
1376	Stellaria media	(L.) Cyrillo			Caryophyllaceae	D	6	US	1.24	1.214666667	0.42	1	0.331227748	0
1377	Ceratophyllum demersum	L.			Ceratophyllaceae	D	6	US	5.408	3.316		3	14.58280379	0
1378	Nelumbo lutea	(Willd.) Pers.			Nymphaeaceae	D	6	US	10.41	6.23		3	100.0970385	0
1379	Nuphar luteum	(L.) Sibth. & Sm.			Nymphaeaceae	D	6	US	4.12	2.7		3	7.359029026	0
1380	Nuphar luteum	(L.) Sibth. & Sm.			Nymphaeaceae	D	6	US	4.635	2.575		3	7.530242874	0
1381	Nuphar advena	(Ait.) Ait.f.		(= SVDS# 1380)			6							0
1382	Nymphozanthus advena	(Ait.) Fern.		(= SVDS# 1380)			6							0
1383	Delphinium barbeyi	Huth			Ranunculaceae	D	6	US	2.6225	1.525		2	2.340355704	0
1384	Delphinium barbeyi	Huth			Ranunculaceae	D	6	US	2.84	1.825		3	2.31619068	0
1385	Delphinium subalpinum	(Gray) A. Nels.		(= SVDS# 1384)			6							0
1386	Delphinium cockerellii	A. Nels.		(= SVDS# 1384)			6							0
1387	Delphinium geyeri	Greene			Ranunculaceae	D	6	US	2.136	1.304		2	1.267092468	0
1388	Delphinium geyeri	Greene			Ranunculaceae	D	6	US	2.16	1.708		3	1.54283311	0
1389	Delphinium menziesii	DC.			Ranunculaceae	D	6	US	1.438	1.228		2	0.711634283	0
1390	Delphinium occidentale	S. Wats.			Ranunculaceae	D	6	US	1.363333333	1.075		2	0.503829423	0
1391	Delphinium occidentale	S. Wats.			Ranunculaceae	D	6	US	1.566666667	1.068333333		2	0.577187252	0
1392	Ranunculus acris	L.			Ranunculaceae	D	6	US	3.1075	2.0825	0.7825	1	2.65142359	0
1393	Ranunculus repens	L.			Ranunculaceae	D	6	US	2.486666667	1.804444444		3	1.9825185	0
1394	Barbarea vulgaris	R. Br.			Brassicaceae	D	6	US	1.64	1.18	0.676	1	0.684969405	0
1395	Brassica kaber	(DC.) L. C. Wheeler			Brassicaceae	D	6	US	1.66	1.56		2	1.432599163	0
1396	Brassica kaber	(DC.) L. C. Wheeler			Brassicaceae	D	6	US	1.62	1.44		2	1.158947162	0
1397	Brassica nigra	(L.) Koch	pinnatifida (Stokes) L.C. Wheeler		Brassicaceae	D	6	US	2.595	2.0775		3	2.742661023	0
1398	Camelina microcarpa	Andrz.	pinnatifida (Stokes) L.C. Wheeler		Brassicaceae	D	6	US	1.096	0.714666667		2	0.170974844	0
1399	Camelina microcarpa	Andrz.			Brassicaceae	D	6	US	1.258666667	0.836		2	0.272659385	0
1400	Capsella bursa-pastoris	(L.) Medic.			Brassicaceae	D	6	US	0.816	0.42		2	0.04311852	0
1401	Capsella bursa-pastoris	(L.) Medic.			Brassicaceae	D	6	US	1.041	0.42		2	0.055110842	0
1402	Cardaria draba	(L.) Desv.			Brassicaceae	D	6	US	0.834666667	0.833333333		2	0.177200099	0
1403	Cardaria draba	(L.) Desv.			Brassicaceae	D	6	US	1.124	0.837333333		2	0.243243925	0
1404	Lepidium draba	L.		(= SVDS# 1402)			6							0
1405	Conringia orientalis	(L.) Dum.			Brassicaceae	D	6	US	1.349333333	0.833333333		2	0.291198083	0
1406	Conringia orientalis	(L.) Dum.			Brassicaceae	D	6	US	1.533333333	0.854666667		2	0.350963402	0
1407	Descurainia pinnata	(Walt.) Britt.			Brassicaceae	D	6	US	1.36	0.68	0.354444444	1	0.171630559	0
1408	Lepidium campestre	(L.) R. Br.			Brassicaceae	D	6	US	2.082	1.022		2	0.713836093	0
1409	Lepidium campestre	(L.) R. Br.			Brassicaceae	D	6	US	2.23	1.484		2	1.802048809	0
1410	Lepidium virginicum	L.			Brassicaceae	D	6	US	1.045	0.732		2	0.171023659	0
1411	Nasturtium officinale	R. Br.			Brassicaceae	D	6	US	1.024	0.831	0.414	1	0.18445904	0
1412	Sisymbrium altissimum	L.			Brassicaceae	D	6	US	0.976	0.573333333		2	0.096905667	0
1413	Sisymbrium altissimum	L.			Brassicaceae	D	6	US	1.082666667	0.681333333		2	0.153100866	0
1414	Thlaspi arvense	L.			Brassicaceae	D	6	US	3.47	2.136666667	0.726666667	1	2.820980673	0
1415	Potentilla canadensis	L.			Rosaceae	D	6	US	1.022	0.725		2	0.163903115	0
1416	Potentilla pumila	Poir.		(= SVDS# 1415)			6							0
1417	Potentilla norvegica	L.			Rosaceae	D	6	US	0.723	0.629	0.426	1	0.101437179	0
1418	Potentilla monspeliensis	L.		(= SVDS# 1417)			6							0
1419	Potentilla recta	L.			Rosaceae	D	6	US	0.911	0.74	0.54	1	0.190608594	0
1420	Pontentilla sulphurea	Rydb.		(= SVDS# 1419)			6							0
1421	Rosa multiflora	Thunb.			Rosaceae	D	6	US	4.585	2.575		3	7.448937119	0
1422	Rosa multiflora	Thunb.			Rosaceae	D	6	US	5.145	2.585		3	8.424774823	0
1423	Rubus allegheniensis	Porter			Rosaceae	D	6	US	3.47	2.033333333	1.773333333	1	6.551293478	0
1424	Astragalus mollissimus	Torr.			Fabaceae	D	6	US	2.433333333	1.966666667	1.043333333	1	2.614291841	0
1425	Daubentonia punicea	(Cav.) DC.			Fabaceae	D	6	US	6.155	4.1	3.185	1	42.08428693	0
1426	Daubentonia texana	Pierce		(= SVDS# 1425)			6							0
1427	Daubentonia longifolia	DC.		(= SVDS# 1425)			6							0
1428	Sesbania cavanillesii	Watson		(= SVDS# 1425)			6							0
1429	Sesbania punicea	(Cav.) Benth.		(= SVDS# 1425)			6							0
1430	Medicago lupulina	L.			Fabaceae	D	6	US	1.834	1.262	1.052	1	1.27489098	0
1431	Oxtytropis lambertii	Pursh			Fabaceae	D	6	US	1.8175	1.58	0.7875	1	1.184079034	0
1432	Pueraria lobata	(Willd.) Ohwi			Fabaceae	D	6	US	4.124	2.92	2.052	1	12.93830804	0
1433	Vicia angustifolia	L.			Fabaceae	D	6	US	3.035	3.035	3.035	1	14.63776291	0
1434	Oxalis stricta	L.			Oxalidaceae	D	6	US	1.216	0.822	0.33	1	0.172710187	0
1435	Croton capitatus	Michx.			Euphorbiaceae	D	6	US	4.148	3.66	3.16	1	25.11918463	0
1436	Euphorbia corollata	L.			Euphorbiaceae	D	6	US	3.16	2.046666667		3	3.241606642	0
1437	Euphorbia esula	L.			Euphorbiaceae	D	6	US	1.875	1.04		2	0.661505254	0
1438	Euphorbia esula	L.			Euphorbiaceae	D	6	US	2.236666667	1.033333333		2	0.791180191	0
1439	Euphorbia maculata	L.			Euphorbiaceae		6	US	1.1	0.9		2	0.276311571	0
1440	Euphorbia maculata	L.			Euphorbiaceae		6	US	1.6	1.1		2	0.628978444	0
1441	Euphorbia supina	Raf. ex Boiss.			Euphorbiaceae	D	6	US	1.098666667	0.829333333	0.706666667	1	0.33713846	0
1442	Rhus glabra	L.			Anacardiaceae	D	6	US	4.592	3.372	2.556	1	20.72282298	0
1443	Rhus radicans	L.			Anacardiaceae		6	US	5	5	5	1	65.44984695	0
1444	Rhus radicans	L.			Anacardiaceae		6	US	6	6	6	1	113.0973355	0
1445	Toxicodendron radicans	(L.) Kuntze		(= SVDS# 1443)			6							0
1446	Rhus toxicodendron	L.			Anacardiaceae	D	6	US	4.06	3.215	2.555	1	17.46210268	0
1447	Rhus quercifolia	(Michx.) Steud.		(= SVDS# 1446)			6							0
1448	Toxicodendron quercifolium	Greene		(= SVDS# 1446)			6							0
1449	Abutilon theophrasti	Medic.			Malvaceae	D	6	US	2.088888889	1.846666667		3	1.744184575	0
1450	Malva neglecta	Wallr.			Malvaceae	D	6	US	1.65	1.65	1.088	1	1.550941461	0
1451	Sida spinosa	L.			Malvaceae	D	6	US	2.123333333	1.773333333	1.476666667	1	2.911318023	0
1452	Jussiaea decurrens	(Walt.) DC.			Onagraceae	D	6	US	0.524375	0.275625		2	0.011874505	0
1453	Myriophyllum exalbescens	Fern.			Haloragidaceae	D	6	US	1.678	0.858		2	0.389090242	0
1454	Myriophyllum exalbescens	Fern.			Haloragidaceae	D	6	US	2.05	0.828		2	0.446069193	0
1455	Myriophyllum spicatum	L.			Haloragidaceae		6	US	2.5	2.5	2.5	1	8.181230869	0
1456	Myriophyllum spicatum	L.			Haloragidaceae		6	US	3	3	3	1	14.13716694	0
1457	Cicuta maculata	L.			Apiaceae	D	6	US	3.07	1.624		2	3.335620262	0
1458	Apocynum cannabinum	L.			Apocynaceae	D	6	US	4.506	0.858		2	1.142457468	0
1459	Apocynum cannabinum	L.			Apocynaceae	D	6	US	5.29	0.878		2	1.448347931	0
1460	Asclepias syriaca	L.			Asclepiadaceae		6	US	6	5		3	36.88348976	0
1461	Asclepias verticillata	L.			Asclepiadaceae	D	6	US	6.35	4.37	1.3	1	18.88848549	0
1462	Convolvulus arvensis	L.			Convolvulaceae	D	6	US	3.865	2.8125	2.0875	1	11.88138683	0
1463	Convolvulus sepium	L.			Convolvulaceae	D	6	US	5.68	4.072		3	23.119926	0
1464	Cuscuta approximata	Babington			Convolvulaceae	D	6	US	1.15	1.03875	0.9125	1	0.570742709	0
1465	Cuscuta planiflora	Amer. auth.		(= SVDS# 1464)			6							0
1466	Cuscuta gracilis	Rydb.		(= SVDS# 1464)			6							0
1467	Cuscuta anthemi	Nels.		(= SVDS# 1464)			6							0
1468	Cuscuta indecora	Choisy			Convolvulaceae	D	6	US	1.24	1.072		2	0.45266483	0
1469	Cuscuta indecora	Choisy	urceolata (Kunze) Yuncker		Convolvulaceae	D	6	US	1.442	1.262		2	0.757835855	0
1470	Cuscuta pentagona	Engelm.			Convolvulaceae	D	6	US	1.888	1.48		2	1.472130616	0
1471	Cuscuta arvensis			(= SVDS# 1470)			6							0
1472	Ipomoea hederacea	(L.) Jacq.			Convolvulaceae	D	6	US	2.502	1.834	1.686	1	4.050818916	0
1473	Ipomoea purpurea	(L.) Roth	calycina Engelm.		Convolvulaceae	D	6	US	5.806666667	3.42	2.816666667	1	29.28782214	0
1474	Lithospermum arvense	L.			Boraginaceae	D	6	US	3.05	2.1025		3	3.301824753	0
1475	Verbena bracteata	Lag. & Rodr.			Verbenaceae	D	6	US	2.201333333	0.844		2	0.501294473	0
1476	Verbena bracteosa	Michx.		(= SVDS# 1475)			6							0
1477	Verbena stricta	Vent.			Verbenaceae	D	6	US	3.236	0.84		2	0.753028305	0
1478	Galeopsis tetrahit	L.			Lamiaceae	D	6	US	3.0875	2.04		3	3.146598225	0
1479	Glechoma hederacea	L.			Lamiaceae	D	6	US	2.05	1.21		2	1.020314294	0
1480	Lamium amplexicaule	L.			Lamiaceae	D	6	US	2.198666667	0.984		2	0.69744386	0
1481	Datura stramonium	L.			Solanaceae	D	6	US	3.406666667	2.706666667	1.773333333	1	8.561570072	0
1482	Physalis heterophylla	Nees			Solanaceae	D	6	US	1.275	1.04875	0.39125	1	0.273927183	0
1483	Solanum carolinense	L.			Solanaceae	D	6	US	2.06	1.686	0.638	1	1.160230002	0
1484	Solanum nigrum	L.			Solanaceae	D	6	US	2.076	1.446	0.74	1	1.163123912	0
1485	Solanum americanum	Mill.			Solanaceae	D	6	US	2.076	1.446	0.74	1	1.163123912	0
1486	Linaria dalmatica	(L.) Mill.			Scrophulariaceae	D	6	US	1.08	0.6648		2	0.145231138	0
1487	Linaria vulgaris	Hill			Scrophulariaceae	D	6	US	1.664	1.24		2	0.853757344	0
1488	Linaria vulgaris	Hill	macedonia Fenzl		Scrophulariaceae	D	6	US	2.028	1.636		2	2.031380783	0
1489	Striga lutea	Lour.			Scrophulariaceae	D	6	US	0.1055	0.056333333		2	9.96106E-05	0
1490	Striga lutea	Lour.			Scrophulariaceae	D	6	US	0.120333333	0.070833333		2	0.000179634	0
1491	Striga asiatica	(L.) Kuntze		(= SVDS# 1489)			6							0
1492	Verbascum blattaria	L.			Scrophulariaceae	D	6	US	0.5155	0.37		2	0.021066917	0
1493	Verbascum thapsus	L.			Scrophulariaceae	D	6	US	0.5968	0.472		2	0.039807302	0
1494	Verbascum thapsus	L.			Scrophulariaceae	D	6	US	0.6496	0.5		2	0.048689939	0
1495	Veronica arvensis	L.			Scrophulariaceae	D	6	US	1.624	1.08		2	0.614290812	0
1496	Veronica officinalis	L.			Scrophulariaceae	D	6	US	0.4976	0.472	0.18	1	0.022135712	0
1497	Veronica peregrina	L.			Scrophulariaceae	D	6	US	0.498	0.3332	0.13	1	0.011294742	0
1498	Campsis radicans	(L.) Seem.			Bignoniaceae	D	6	US	6.8	4.92		3	40.49184463	0
1499	Orobanche minor	J. E. Smith			Orobanchaceae	D	6	US	0.244	0.1244		2	0.001123631	0
1500	Orobanche minor	J. E. Smith			Orobanchaceae	D	6	US	0.2976	0.2112		2	0.003951934	0
1501	Plantago rugelii	Decne.			Plantaginaceae	D	6	US	2.11	1.233333333		2	1.100513329	0
1502	Plantago lanceolata	L.			Plantaginaceae	D	6	US	2.246	0.96		2	0.676403243	0
1503	Plantago major	L.			Plantaginaceae	D	6	US	1.25	0.848		2	0.278855394	0
1504	Diodia teres	Walt.			Rubiaceae	D	6	US	4.928	2.944		3	10.46900967	0
1505	Galium aparine	L.			Rubiaceae		6	US	2	2	2	1	4.188790205	0
1506	Galium aparine	L.			Rubiaceae		6	US	3	3	3	1	14.13716694	0
1507	Galium mollugo	L.			Rubiaceae	D	6	US	1.528333333	1.065		2	0.558218039	0
1508	Lonicera japonica	Thunb.			Caprifoliaceae	D	6	US	3.644	2.504		3	5.596932355	0
1509	Dipsacus sylvestris	Huds.			Dipsacaceae	D	6	US	3.7975	1.5925		3	2.358246037	0
1510	Dipsacus sylvestris	Huds.	chinensis (P.W. Wats.) Baker		Dipsacaceae	D	6	US	4.05	1.6125		3	2.578686438	0
1511	Achillea millefolium	L.			Asteraceae	D	6	US	2.085	0.873333333		2	0.508878086	0
1512	Ambrosia artemisiifolia	L.			Asteraceae	D	6	US	2.052	1.438		2	1.516946003	0
1513	Ambrosia psilostachya	DC.			Asteraceae	D	6	US	3.146666667	2.48		3	4.740367844	0
1514	Anthemis cotula	L.			Asteraceae	D	6	US	1.54875	0.65125		2	0.201529386	0
1515	Anthemis cotula	L.			Asteraceae	D	6	US	1.64375	0.80625		2	0.334038281	0
1516	Arctium minus	(Hill) Bernh.			Asteraceae	D	6	US	6.073333333	2.42		3	8.716156114	0
1517	Artemisia vulgaris	L.			Asteraceae	D	6	US	2.082	0.866		2	0.49901134	0
1518	Artemisia vulgaris	L.			Asteraceae	D	6	US	2.432	1.028		2	0.858024468	0
1519	Bidens bipinnata	L.			Asteraceae	D	6	US	12.89666667	1.456666667		3	6.70438842	0
1520	Bidens frondosa	L.			Asteraceae	D	6	US	6.826666667	3.133333333		3	16.43972705	0
1521	Centaurea diffusa	Lam.			Asteraceae	D	6	US	2.262	1.026		2	0.788585542	0
1522	Centaurea maculosa	Lam.			Asteraceae	D	6	US	3.1075	1.5875		2	3.196924968	0
1523	Centaurea repens	L.			Asteraceae	D	6	US	2.292	1.038		2	0.820928666	0
1524	Centaurea picris	Pall.		(= SVDS# 1523)			6							0
1525	Centaurea solstitialis	L.			Asteraceae	D	6	US	1.566666667	0.693333333		2	0.232083335	0
1526	Chrysanthemum leucanthemum	L.			Asteraceae	D	6	US	1.517333333	0.72		2	0.242770246	0
1527	Chrysothamnus nauseosus	(Pall.) Britt.			Asteraceae	D	6	US	5.488	0.712		2	0.937141346	0
1528	Chrysothamnus viscidiflorus	(Hook.) Nutt.	pinnatifidum Lecoq & Lamotte		Asteraceae	D	6	US	3.046	0.878		2	0.776546604	0
1529	Cichorium intybus	L.			Asteraceae	D	6	US	1.906666667	0.826666667		2	0.411658149	0
1530	Cirsium arvense	(L.) Scop.			Asteraceae	D	6	US	4.816666667	1.4		3	2.311706316	0
1531	Cirsium vulgare	(Savi) Tenore			Asteraceae	D	6	US	4.122857143	1.554285714		3	2.438915185	0
1532	Cirsium lanceolatum	Hill		(= SVDS# 1531)			6							0
1533	Conyza canadensis	(L.) Cronq.			Asteraceae	D	6	US	1.344	0.542		2	0.11966968	0
1534	Erigeron canadensis	L.		(= SVDS# 1533)			6							0
1535	Erigeron annuus	(L.) Pers.			Asteraceae	D	6	US	1.03	0.425		2	0.055840866	0
1536	Erigeron annuus	(L.) Pers.			Asteraceae	D	6	US	1.338	0.52		2	0.109491326	0
1537	Eupatorium capillifolium	(Lam.) Small			Asteraceae	D	6	US	1.834	0.544		2	0.165641533	0
1538	Eupatorium rugosum	Houtt.			Asteraceae	D	6	US	2.983076923	0.681538462		2	0.439389101	0
1539	Eupatorium rugosum	Houtt.			Asteraceae	D	6	US	3.298461538	0.738461538		2	0.580892934	0
1540	Eupatorium urticaefolium	Reichard		(= SVDS# 1538)			6							0
1541	Galinsoga parviflora	Cav.			Asteraceae	D	6	US	3.286	1.034		2	1.219731339	0
1542	Gutierrezia dracunculoides	(DC.) Blake			Asteraceae	D	6	US	2.098	1.422		2	1.516577106	0
1543	Brachyris dracunculoides	DC.		(= SVDS# 1542)			6							0
1544	Amphiachyris dracunculoides	DC.		(= SVDS# 1542)			6							0
1545	Xanthocephalum dracunculoides	(DC.) Shinners		(= SVDS# 1542)			6							0
1546	Haplopappus tenuisectus	(Greene) Blake ex Benson			Asteraceae	D	6	US	1.634666667	0.697333333		2	0.245428381	0
1547	Helenium amarum	(Raf.) Rock			Asteraceae	D	6	US	0.972	0.557333333		2	0.091116494	0
1548	Helianthus annuus	L.			Asteraceae	D	6	US	10.92666667	7.46	3.933333333	1	167.8749502	0
1549	Iva xanthifolia	Nutt.			Asteraceae	D	6	US	2.432	1.624	1.27	1	2.626345991	0
1550	Lactuca serriola	L.			Asteraceae	D	6	US	3.55	1.185	0.54375	1	1.197690475	0
1551	Senecio jacobaea	L.			Asteraceae	D	6	US	3.04	1.03		2	1.106570282	0
1552	Solidago canadensis	L.			Asteraceae	D	6	US	1.2152	0.456		2	0.076080852	0
1553	Sonchus arvensis	L.			Asteraceae	D	6	US	2.442666667	0.966666667		2	0.752743978	0
1554	Sonchus asper	(L.) Hill			Asteraceae	D	6	US	2.082	1.072	0.442	1	0.516531013	0
1555	Sonchus oleraceus	L.			Asteraceae	D	6	US	2.453333333	0.981333333	0.450666667	1	0.568103114	0
1556	Taraxacum officinale	Weber			Asteraceae	D	6	US	3.29	1.11		2	1.438297295	0
1557	Taraxacum officinale	Weber			Asteraceae	D	6	US	5.2	1.13		2	2.598696974	0
1558	Taraxacum vulgare	Lam.		(= SVDS# 1556)			6							0
1559	Vernonia altissima	Nutt.			Asteraceae	D	6	US	3.07	1.282		2	1.861033418	0
1560	Vernonia baldwinii	Torr.			Asteraceae	D	6	US	2.885	0.868333333	0.54	1	0.708312119	0
1561	Xanthium pensylvanicum	Wallr.			Asteraceae	D	6	US	14.84	4.08		3	60.9172938	0
1562	Senecio jacobaea	L.			Asteraceae	D	6	US	2.545	1.0875		2	1.023548318	0
1563	Senecio jacobaea	L.			Asteraceae	D	6	US	3.0775	1.1075		2	1.324464165	0
1564	Pinus taeda				Pinaceae		7	US	6.216	2.844	2.112	1	19.54938655	0
1565	Picea engelmannii				Pinaceae		7	US	2.765454545	1.518181818	0.936363636	1	2.058417533	0
1566	Abies lasiocarpa				Pinaceae		7	US	6.108	3.332	1.664	1	17.73192825	0
1567	Tsuga canadensis				Pinaceae		7	US	3.278	1.822	1.36	1	4.252994808	0
1568	Pseudo-tsuga taxifolia				Pinaceae		7	US	4.374285714	2.054285714	1.285714286	1	6.049383036	0
1569	Juniperus virginiana				Pinaceae		7	US	3.8375	1.8125	1.475	1	5.371765509	0
1570	Typha latifolia				Typhaceae		7	US	1.085	0.309285714	0.242857143	1	0.042671617	0
1571	Sparganium eurycarpum				Sparganiaceae		7	US	4.34	1.842857143	1.788571429	1	7.490077493	0
1572	Potamogeton diversifolius				Najadaceae		7	US	1.525	1.249		2	0.787800629	0
1573	Potamogeton spirillus				Najadaceae		7	US	1.826	1.517		2	1.499827242	0
1574	Potamogeton foliosus				Najadaceae		7	US	2.014	1.43		2	1.46507005	0
1575	Potamogeton pusillus				Najadaceae		7	US	2.135	1.55		2	1.897982472	0
1576	Potamogeton alpinus				Najadaceae		7	US	2.234	1.622		2	2.236930698	0
1577	Potamogeton bupleuroides				Najadaceae		7	US	2.36	1.618		2	2.377734197	0
1578	Potamogeton gramineus				Najadaceae		7	US	2.226	1.849		3	1.863396811	0
1579	Potamogeton friesii				Najadaceae		7	US	2.362	1.733		3	1.736907604	0
1580	Potamogeton obtusifolius				Najadaceae		7	US	2.428	1.847		3	2.028138096	0
1581	Potamogeton filiformis				Najadaceae		7	US	2.628	1.849		3	2.200003094	0
1582	Potamogeton richardsonii				Najadaceae		7	US	2.636	1.636		2	2.802684566	0
1583	Potamogeton pulcher				Najadaceae		7	US	2.663	2.032		3	2.692580164	0
1584	Potamogeton epihydrus				Najadaceae		7	US	2.933	2.539		3	4.631158619	0
1585	Potamogeton vaginatus				Najadaceae		7	US	2.859	1.95		3	2.662145834	0
1586	Potamogeton pectinatus				Najadaceae		7	US	3.246	2.449		3	4.768540895	0
1587	Potamogeton nodosus				Najadaceae		7	US	3.244	2.148		3	3.66564782	0
1588	Potamogeton ilinoensis				Najadaceae		7	US	3.362	2.533		3	5.283900729	0
1589	Potamogeton natans				Najadaceae		7	US	3.444	2.253		3	4.281730369	0
1590	Potamogeton amplifolius				Najadaceae		7	US	3.842	2.859		3	7.694831386	0
1591	Potamogeton praelongus				Najadaceae		7	US	3.861	2.83		3	7.576696567	0
1592	Potamogeton zosteriformis				Najadaceae		7	US	3.976	2.832		3	7.813624904	0
1593	Panicum anceps				Poaceae		7	US	1.303636364	1.296363636	0.77	1	0.681353755	0
1594	Setaria lutescens				Poaceae		7	US	2.184285714	1.481428571	0.891428571	1	1.510342119	0
1595	Paspalum floridanum				Poaceae		7	US	2.731666667	1.875	0.8	1	2.145445983	0
1596	Bromus commutatus				Poaceae		7	US	7.595	2.06	1.085	1	8.888395259	0
1597	Echinochloa colonum				Poaceae		7	US	1.71	1.476666667	0.936666667	1	1.238403781	0
1598	Zizaniopsis miliacea				Poaceae		7	US	2.541666667	1.068333333	0.855	1	1.215598371	0
1599	Dactyloctenium aegyptium				Poaceae		7	US	1.085	0.893571429	0.442857143	1	0.224812931	0
1600	Eleusine indica				Poaceae		7	US	1.260769231	0.397692308	0.318461538	1	0.083606184	0
1601	Sporobolus cryptandrus				Poaceae		7	US	1.085	0.743571429	0.435714286	1	0.184057218	0
1602	Cyperus filiculmis				Cyperaceae		7	US	1.54	0.614	0.61	1	0.302007376	0
1603	Dulichium arundinaceum				Cyperaceae		7	US	2.735	0.683333333	0.395	1	0.386532179	0
1604	Eleocharis albida				Cyperaceae		7	US	0.694090909	0.427272727	0.369090909	1	0.057313047	0
1605	Fimbristylis castanea				Cyperaceae		7	US	1.17	0.862307692	0.318461538	1	0.168230112	0
1606	Rhynchospora cymosa				Cyperaceae		7	US	1.012666667	0.946666667	0.416	1	0.208812048	0
1607	Scirpus atrovirens				Cyperaceae		7	US	0.6512	0.3724	0.206	1	0.026157119	0
1608	Scirpus acutus				Cyperaceae		7	US	1.49	1.019090909	0.400909091	1	0.318745251	0
1609	Scleria verticillata				Cyperaceae		7	US	0.655909091	0.645454545	0.554545455	1	0.122926378	0
1610	Claudium jamaicense				Cyperaceae		7	US	0.718695652	0.5	0.492173913	1	0.092604531	0
1611	Carex lurida				Cyperaceae		7	US	1.69	0.677777778	0.576666667	1	0.345857741	0
1612	Aneilema nudiflorum				Commelinaceae		7	US	1.098571429	0.742142857	0.724285714	1	0.309189227	0
1613	Commelina crispa				Commelinaceae		7	US	1.9375	1.5475	1.28125	1	2.011429751	0
1614	Tradescantia virginiana				Commelinaceae		7	US	2.432307692	1.715384615	1.646923077	1	3.597923801	0
1615	Pontederia cordata				Pontederiaceae		7	US	3.108	2.07	2.062	1	6.946061734	0
1616	Juncus marginatus				Juncaceae		7	US	0.353255814	0.194651163	0.190232558	1	0.006849041	0
1617	Smilacina stellata				Liliaceae		7	US	3.078	2.634	2.448	1	10.39188715	0
1618	Polygonatum commutatum				Liliaceae		7	US	3.272	2.65	2.258	1	10.25136575	0
1619	Maianthemum cadadense				Liliaceae		7	US	2.787272727	2.052727273	1.903636364	1	5.702868169	0
1620	Smilax glauca				Liliaceae		7	US	4.0975	2.37	2.345	1	11.92363787	0
1621	Hypoxis hirsuta				Amaryllidaceae		7	US	1.023333333	0.827333333	0.826	1	0.366164564	0
1622	Sisyrinchium bellum				Iridaceae		7	US	1.647	1.138	1.02	1	1.001001332	0
1623	Ostrya virginiana				Betulaceae		7	US	4	2.2	1	1	4.607669225	0
1624	Carpinus caroliniana				Betulaceae		7	US	2.7	2.4	1.2	1	4.071504079	0
1625	Betula lenta				Betulaceae		7	US	1.694444444	1.27	0.492222222	1	0.554614084	0
1626	Alnus serrulata				Betulaceae		7	US	2.052	1.098666667	0.590666667	1	0.697243365	0
1627	Celtis reticulata				Ulmaceae		7	US	3	3	3	1	14.13716694	0
1628	Celtis reticulata				Ulmaceae		7	US	7	7	7	1	179.59438	0
1629	Morus alba				Moraceae		7	US	2.046666667	1.368	0.958666667	1	1.405398427	0
1630	Maclura pomifera				Moraceae		7	US	8	4.5	1.5	1	28.27433388	0
1631	Urtica lyallii				Urticaceae		7	US	0.9	0.7	0.3	1	0.098960169	0
1632	Boehmeria cylindrica				Urticaceae		7	US	0.7	0.5	0.3	1	0.054977871	0
1633	Parietaria pensylvanica				Urticaceae		7	US	1	0.6	0.5	1	0.157079633	0
1634	Eriogonum latifolium				Polygonaceae		7	US	2.038666667	1.113333333	0.72	1	0.855662606	0
1635	Rumex crispus				Polygonaceae		7	US	1.71	1.138888889	1.053333333	1	1.074093075	0
1636	Polygonum punctatum				Polygonaceae		7	US	1.814444444	1.124444444	0.904444444	1	0.966189239	0
1637	Polygonum virginianum				Polygonaceae		7	US	3.038	2.09	1.098	1	3.650354294	0
1638	Polygonum sagittatum				Polygonaceae		7	US	1.906666667	1.789333333	1.632	1	2.915310409	0
1639	Polygonum amphibium				Polygonaceae		7	US	2.486363636	2.021818182	1.214545455	1	3.196827029	0
1640	Polygonum coccineum				Polygonaceae		7	US	3.132727273	2.308181818		3	4.087767557	0
1641	Polygonum densiflorum				Polygonaceae		7	US	2.574545455	1.961818182	1.13	1	2.988383878	0
1642	Polygonum punctatum				Polygonaceae		7	US	2.671818182	1.769090909	1.395454545	1	3.453594696	0
1643	Polygonum persicaria				Polygonaceae		7	US	2.415454545	1.490909091		2	2.004895619	0
1644	Polygonum persicaria				Polygonaceae		7	US	2.405454545	1.765454545		3	1.835756794	0
1645	Polygonum hydropiperoides				Polygonaceae		7	US	1.868181818	1.493636364		2	1.485549932	0
1646	Polygonum hydropiperoides				Polygonaceae		7	US	2.237272727	1.486363636		2	1.815906073	0
1647	Polygonum hydropiper				Polygonaceae		7	US	3.050909091	1.954545455		3	2.854167128	0
1648	Polygonum sagittatum				Polygonaceae		7	US	3.056363636	2.036363636	1.755454545	1	5.720692025	0
1649	Polygonum pensylvanicum				Polygonaceae		7	US	2.786363636	2.297272727		3	3.601312894	0
1650	Polygonum pensylvanicum				Polygonaceae		7	US	2.782727273	2.498181818		3	4.253545036	0
1651	Polygonum longistylum				Polygonaceae		7	US	3.033636364	2.411818182		3	4.322037821	0
1652	Polygonum longistylum				Polygonaceae		7	US	3.054545455	2.401818182		3	4.315811147	0
1653	Polygonum arifolium				Polygonaceae		7	US	4.790909091	3.86	2.973636364	1	28.79331815	0
1654	Polygonum lapathifolium				Polygonaceae		7	US	2.239090909	1.864545455	0.518181818	1	1.132727631	0
1655	Polygonum orientale				Polygonaceae		7	US	2.868181818	2.763636364	1.481818182	1	6.150085004	0
1656	Polygonum cilinode				Polygonaceae		7	US	2.955454545	2.027272727	1.948181818	1	6.111735776	0
1657	Polygonum scandens				Polygonaceae		7	US	4.139090909	3.217272727	2.874545455	1	20.04290396	0
1658	Polygonum dumetorum				Polygonaceae		7	US	2.574545455	1.654545455	1.478181818	1	3.296899777	0
1659	Polygonum convolvulus				Polygonaceae		7	US	3.241818182	2.205454545	1.862727273	1	6.973240769	0
1660	Polygonum douglasii				Polygonaceae		7	US	2.869090909	1.48	1.308181818	1	2.908524697	0
1661	Polygonum virginianum				Polygonaceae		7	US	3.674545455	2.143636364	1.380909091	1	5.695324197	0
1662	Polygonum ramosissimum				Polygonaceae		7	US	2.572727273	1.680909091		2	2.909626087	0
1663	Polygonum aviculare				Polygonaceae		7	US	2.218181818	1.470909091		2	1.753427001	0
1664	Polygonum erectum				Polygonaceae		7	US	2.401818182	2.037272727	1.380909091	1	3.53796075	0
1665	Fagopyrum esculentum				Polygonaceae		7	US	4.5	3.5	3.5	1	28.8633825	0
1666	Chenopodium capitatum				Chenopodiaceae		7	US	0.893529412	0.676470588	0.367058824	1	0.116169484	0
1667	Chenopodium ambrosioides				Chenopodiaceae		7	US	0.660454545	0.655	0.423636364	1	0.095956873	0
1668	Chenopodium album				Chenopodiaceae		7	US	1.369166667	1.02	0.618333333	1	0.45214504	0
1669	Cyclolama atriplicifolium				Chenopodiaceae		7	US	1.364166667	1.3625	0.515	1	0.501198538	0
1670	Atriplex rosea				Chenopodiaceae		7	US	1.577777778	1.377777778	0.578888889	1	0.658898998	0
1671	Corispermum hyssopifolium				Chenopodiaceae		7	US	4	3	0.5	1	3.141592654	0
1672	Kochia scoparia				Chenopodiaceae		7	US	2	1.5	0.5	1	0.785398163	0
1673	Suaeda depressa				Chenopodiaceae		7	US	1	1	0.5	1	0.261799388	0
1674	Amaranthus retroflexus				Amaranthaceae		7	US	1.089285714	0.957142857	0.531428571	1	0.290109595	0
1675	Boerhaavia torreyana				Nyctaginaceae		7	US	1.816666667	0.824444444	0.803333333	1	0.629986225	0
1676	Abronia fragrans				Nyctaginaceae		7	US	2.349230769	1.109230769	0.941538462	1	1.284648388	0
1677	Oxybaphus albidus				Nyctaginaceae		7	US	3.651111111	1.588888889	1.355555556	1	4.11750866	0
1678	Phytolacca americana				Phytolaccaceae		7	US	2.8	2.5	1	1	3.665191429	0
1679	Mollugo verticillata				Aizoaceae		7	US	0.7	0.6	0.4	1	0.087964594	0
1680	Sesuvium maritimum				Aizoaceae		7	US	0.8	0.7	0.4	1	0.117286126	0
1681	Calandrinia caulescens				Portulacaceae		7	US	1.529	1.146	0.61	1	0.559655222	0
1682	Montia perfoliata				Portulacaceae		7	US	1.552	1.119	0.622	1	0.565601836	0
1683	Portulaca oleracea				Portulacaceae		7	US	0.816842105	0.692105263	0.392631579	1	0.116223545	0
1684	Spergula arvensis				Caryophyllaceae		7	US	1	0.9	0.7	1	0.329867229	0
1685	Agrostemma githago				Caryophyllaceae		7	US	3	2.5	1.7	1	6.675884389	0
1686	Stellaria media				Caryophyllaceae		7	US	1.180714286	1.033571429	0.517857143	1	0.33089782	0
1687	Cerastium viscosum				Caryophyllaceae		7	US	0.399736842	0.380263158	0.273421053	1	0.021761509	0
1688	Silene latifolia				Caryophyllaceae		7	US	1.349230769	1.096923077	0.706923077	1	0.547814081	0
1689	Lychnis alba				Caryophyllaceae		7	US	1.074375	0.96125	0.63625	1	0.344047704	0
1690	Saponaria vaccaria				Caryophyllaceae		7	US	2.072	2.072	2.061333333	1	4.633683333	0
1691	Saponaria officinales				Caryophyllaceae		7	US	2.044444444	1.61	0.904444444	1	1.55876881	0
1692	Ceratophyllum demersum				Ceratophyllaceae		7	US	5	3	2	1	15.70796327	0
1693	Nuphar luteum				Nymphaeaceae		7	US	5	3	2.7	1	21.20575041	0
1694	Nymphaea tuberosa				Nymphaeaceae		7	US	3	2.2	2	1	6.911503838	0
1695	Brasenia schreberi				Nymphaeaceae		7	US	2.5	1.8	1.8	1	4.241150082	0
1696	Ranunculus lapponicus				Ranunculaceae		7	US	1.69	1.147777778	0.511111111	1	0.519108884	0
1697	Ranunculus trichophyllus				Ranunculaceae		7	US	1.098	0.550666667	0.340666667	1	0.107849812	0
1698	Ranunculus cymbalaria				Ranunculaceae		7	US	0.547666667	0.347	0.237	1	0.023582658	0
1699	Delphinium geyeri				Ranunculaceae		7	US	2.558333333	1.721666667	1.366666667	1	3.151863674	0
1700	Anemone caroliniana				Ranunculaceae		7	US	1.639	1.214	0.528	1	0.550085485	0
1701	Berberis aquifolium				Berberidaceae		7	US	4.705714286	2.054285714	1.214285714	1	6.14618897	0
1702	Cocculus carolinus				Menispermaceae		7	US	4.5	3.6	1.8	1	15.2681403	0
1703	Magnolia acuminata				Magnoliaceae		7	US	7.76	5.71	2.145	1	49.7649702	0
1704	Liriodendron tulipifera				Magnoliaceae		7	US	5	2.5	1.5	1	9.817477042	0
1705	Lindera aestivale				Lauraceae		7	US	4.5	4.5		3	22.36767023	0
1706	Sassafras officinale				Lauraceae		7	US	6	5	4.5	1	70.68583471	0
1707	Argemone platyceras				Papaveraceae		7	US	1.651	1.247	1.216	1	1.310828044	0
1708	Eschscholtzia californica				Papaveraceae		7	US	1.722222222	1.26	1.238888889	1	1.407637131	0
1709	Papaver dubium				Papaveraceae		7	US	0.697727273	0.430909091	0.378636364	1	0.059606318	0
1710	Papaver somniferum				Papaveraceae		7	US	1.262307692	0.718461538	0.71	1	0.337151987	0
1711	Polanisia graveolens				Capparidaceae		7	US	2.2	1.9	1.1	1	2.40750717	0
1712	Cleome serrulata				Cleomaceae		7	US	3.07	2.044	1.48	1	4.862723823	0
1713	Capsella bursa-pastoris				Brassicaceae		7	US	1.2	1	0.33	1	0.207345115	0
1714	Barbarea vulgaris				Brassicaceae		7	US	1.3	1	0.6	1	0.408407045	0
1715	Barbarea verna				Brassicaceae		7	US	2	1.2	0.8	1	1.005309649	0
1716	Descurainia pinnata				Brassicaceae		7	US	0.8	0.5	0.5	1	0.104719755	0
1717	Descurainia pinnata				Brassicaceae		7	US	1.5	0.5	0.5	1	0.196349541	0
1718	Hamamelis virginiana				Hamamelidaceae		7	US	8	5	4	1	83.7758041	0
1719	Liquidambar styraciflua				Hamamelidaceae		7	US	8	3	1	1	12.56637061	0
1720	Platanus occidentalis				Platanaceae		7	US	8	1	1	1	4.188790205	0
1721	Platanus occidentalis				Platanaceae		7	US	9	1.5	1	1	7.068583471	0
1722	Malus atrosanguinea				Rosaceae		7	US	3.608888889	2.071111111	1.36	1	5.322484929	0
1723	Photinia arbutifolia				Rosaceae		7	US	3.306	2.074	0.844	1	3.03007006	0
1724	Photinia arbutifolia				Rosaceae		7	US	3	2	1.5	1	4.71238898	0
1725	Photinia arbutifolia				Rosaceae		7	US	4	3	1.5	1	9.424777961	0
1726	Amelanchier canadensis				Rosaceae		7	US	4.1075	2.03	1.04	1	4.540519777	0
1727	Sorbus aucuparia				Rosaceae		7	US	3.453333333	1.822222222	1.148888889	1	3.785441081	0
1728	Aronia arbutifolia				Rosaceae		7	US	2.536923077	1.278461538	0.833846154	1	1.416053032	0
1729	Cotoneaster pyracantha				Rosaceae		7	US	2.190666667	0.989333333	0.984	1	1.116638667	0
1730	Crataegus mollis				Rosaceae		7	US	5.18	2.763333333	1.773333333	1	13.29082793	0
1731	Rosa bracteata				Rosaceae		7	US	3.302	1.678	1.088	1	3.156432767	0
1732	Rubus cuneifolius				Rosaceae		7	US	1.525	1.045	0.635	1	0.529856763	0
1733	Prunus angustifolia				Rosaceae		7	US	7.675	5.185	4.225	1	88.03441456	0
1734	Fragaria chiloensis				Rosaceae		7	US	1.182142857	0.818571429	0.525714286	1	0.266363643	0
1735	Potentilla monspeliensis				Rosaceae		7	US	0.864736842	0.543684211	0.282105263	1	0.069444922	0
1736	Prosopis pubescens				Fabaceae		7	US	3.05	2.082	1.67	1	5.552590657	0
1737	Schrankia uncinata				Fabaceae		7	US	4.7	1.742857143	1.265714286	1	5.42867638	0
1738	Desmanthus illinoensis				Fabaceae		7	US	3.5	2.5	1	1	4.581489286	0
1739	Desmanthus leptolobus				Fabaceae		7	US	5	2	1	1	5.235987756	0
1740	Mimosa biuncifera				Fabaceae		7	US	4	2.5	1.5	1	7.853981634	0
1741	Cassia tora				Fabaceae		7	US	4.728571429	2.697142857	2.385714286	1	15.93129051	0
1742	Cassia ligustrina				Fabaceae		7	US	3.6	2.295555556	1.58	1	6.836692045	0
1743	Cassia occidentalis				Fabaceae		7	US	3.8025	2.8225	1.32	1	7.417810371	0
1744	Chamaecrista fasciculata				Fabaceae		7	US	3.468	1.834	1.052	1	3.503424658	0
1745	Crotalaria spectabilis				Fabaceae		7	US	3.108	2.882	1.232	1	5.778090194	0
1746	Medicago lupulina				Fabaceae		7	US	2.266666667	1.722222222	1.035555556	1	2.116649128	0
1747	Trifolium repens				Fabaceae		7	US	1.838888889	1.493333333	0.923333333	1	1.327606544	0
1748	Lotus crassifolius				Fabaceae		7	US	2.735	2.043333333	1.89	1	5.530405515	0
1749	Melilotus alba				Fabaceae		7	US	1.698888889	1.137777778	0.811111111	1	0.820921058	0
1750	Amorpha canescens				Fabaceae		7	US	2.738333333	1.23	0.875	1	1.543114314	0
1751	Indigofera caroliniana				Fabaceae		7	US	2.592	2.058666667	1.253333333	1	3.50175891	0
1752	Tephrosia virginiana				Fabaceae		7	US	3.058333333	2.033333333	1.23	1	4.004950311	0
1753	Sesbania macrocarpa				Fabaceae		7	US	4	2.5	2	1	10.47197551	0
1754	Robinia pseudoacacia				Fabaceae		7	US	4.065	2.7975	1.845	1	10.98564695	0
1755	Astragalus brazoensis				Fabaceae		7	US	2.734666667	1.522666667	0.984	1	2.145373729	0
1756	Aeschynomene virginica				Fabaceae		7	US	4	3	1.5	1	9.424777961	0
1757	Desmodium tortuosum				Fabaceae		7	US	2.602666667	1.782666667	0.722666667	1	1.755599058	0
1758	Lespedeza repens				Fabaceae		7	US	2.478571429	1.592857143	0.921428571	1	1.904752549	0
1759	Apios tuberosa				Fabaceae		7	US	6	5	4.5	1	70.68583471	0
1760	Centrosema virginianum				Fabaceae		7	US	3	2.5	2	1	7.853981634	0
1761	Centrosema virginianum				Fabaceae		7	US	4	2.5	2	1	10.47197551	0
1762	Amphicarpa bracteata				Fabaceae		7	US	3.5	3	1.5	1	8.246680716	0
1763	Linum berlandieri				Linaceae		7	US	3.31	1.244	0.68	1	1.466074058	0
1764	Oxalis stricta				Oxalidaceae		7	US	1.173571429	0.724285714	0.316428571	1	0.14082954	0
1765	Larrea tridentata				Zygophyllaceae		7	US	3.902222222	1.433333333	0.984444444	1	2.883029149	0
1766	Kallstroemia grandiflora				Zygophyllaceae		7	US	4	3	2	1	12.56637061	0
1767	Polygala sanguinea				Polygonaceae		7	US	1.096666667	0.761333333	0.757333333	1	0.331081705	0
1768	Polygala grandiflora				Polygonaceae		7	US	2.195714286	1.18	1.027142857	1	1.393436901	0
1769	Croton punctatus				Euphorbiaceae		7	US	5.116666667	3.45	2.396666667	1	22.1519763	0
1770	Croton capitatus				Euphorbiaceae		7	US	3.646666667	2.762222222	1.755555556	1	9.25908097	0
1771	Eremocarpus setigerus				Euphorbiaceae		7	US	4	3.5	2.5	1	18.32595715	0
1772	Eremocarpus setigerus				Euphorbiaceae		7	US	6	3.5	2.5	1	27.48893572	0
1773	Acalypha virginica				Euphorbiaceae		7	US	1.356666667	0.929166667	0.864166667	1	0.570378187	0
1774	Tragia urens				Euphorbiaceae		7	US	3.651111111	2.995555556	2.944444444	1	16.86181868	0
1775	Stillingia aquatica				Euphorbiaceae		7	US	3.642222222	3.426666667	2.528888889	1	16.52595898	0
1776	Euphorbia lathyrus				Euphorbiaceae		7	US	5.503333333	4.17	3.75	1	45.06005978	0
1777	Euphorbia vermiculata				Euphorbiaceae		7	US	1.099333333	1.018	0.694	1	0.406663569	0
1778	Euphorbia vermiculata				Euphorbiaceae		7	US	2.178571429	2.052857143	1.751428571	1	4.101300437	0
1779	Empetrum nigrum				Empetraceae		7	US	2	1.2	0.5	1	0.628318531	0
1780	Rhus glabra				Anacardiaceae		7	US	2.66	1.601538462	1.215384615	1	2.711011541	0
1781	Toxicodendron diversiloba				Anacardiaceae		7	US	3.709090909	2.758181818	1.334545455	1	7.148622471	0
1782	Ilex verticillata				Aquifoliaceae		7	US	2.972727273	1.667272727	1.349090909	1	3.501076108	0
1783	Celastrus scandens				Celastraceae		7	US	6.472	2.984	2.984	1	30.17413079	0
1784	Euonymus atropurpureus				Celastraceae		7	US	8.215	4.69	3.615	1	72.92682974	0
1785	Impatiens biflora				Balsaminaceae		7	US	4	2.5	2	1	10.47197551	0
1786	Rhamnus alnifolia				Rhamnaceae		7	US	3.397777778	2.742222222	0.751111111	1	3.664379344	0
1787	Rhamnus cathartica				Rhamnaceae		7	US	4.705714286	2.997142857	2.951428571	1	21.79535254	0
1788	Rhamnus purshiana				Rhamnaceae		7	US	4.405714286	3.808571429	2.131428571	1	18.72612163	0
1789	Ceanothus cuneatus				Rhamnaceae		7	US	3.282	2.06	1.22	1	4.318811509	0
1790	Condalia obovata				Rhamnaceae		7	US	3.6	2.962222222	1.164444444	1	6.501858773	0
1791	Berchemia scandens				Rhamnaceae		7	US	4	3	2	1	12.56637061	0
1792	Vitis aestivalis				Vitaceae		7	US	4.1175	3.06	1.7775	1	11.72636116	0
1793	Ampelopsis cordata				Vitaceae		7	US	4.717142857	4.128571429	2.974285714	1	30.32914302	0
1794	Parthenocissus quinquefolia				Vitaceae		7	US	3.8375	2.8025	2.1175	1	11.92383756	0
1795	Sphaeralcea angustifolia				Malvaceae		7	US	1.6025	1.369166667	0.676666667	1	0.777369972	0
1796	Sidalcea neomexicana				Malvaceae		7	US	2.033333333	1.753333333	0.832	1	1.55308426	0
1797	Malvastrum exile				Malvaceae		7	US	1.232666667	1.023333333	0.352666667	1	0.232930205	0
1798	Sida rhombifolia				Malvaceae		7	US	1.838888889	1.131111111	0.936666667	1	1.020103986	0
1799	Hibiscus incanus				Malvaceae		7	US	2.461333333	2.173333333	1.352	1	3.786797557	0
1800	Melochia corchorifolia				Sterculiaceae		7	US	3	1.5	1.5	1	3.534291735	0
1801	Viola eriocarpa				Violaceae		7	US	2.185333333	1.497333333	1.245333333	1	2.133636431	0
1802	Passiflora incarnata				Passifloraceae		7	US	5.426666667	4.48	1.393333333	1	17.73637282	0
1803	Mentzelia decapetala				Loasaceae		7	US	2.818181818	1.349090909	0.6	1	1.194428334	0
1804	Mentzelia lindleyi				Loasaceae		7	US	1.575555556	1.037777778	0.578888889	1	0.495600715	0
1805	Opuntia leptocaulis				Cactaceae		7	US	2.78	2.218181818	0.992727273	1	3.205313499	0
1806	Opuntia pollardi				Cactaceae		7	US	3.388888889	2.971111111	1.415555556	1	7.462799337	0
1807	Mammillaria robustispina				Cactaceae		7	US	3.108	2.836	1.076	1	4.965901835	0
1808	Mammillaria vivipara				Cactaceae		7	US	1.519	1.039	0.626	1	0.517304525	0
1809	Echinocactus intertextus				Cactaceae		7	US	2.033333333	1.121333333	0.973333333	1	1.161993053	0
1810	Echinocactus polycephalus				Cactaceae		7	US	3.298	2.028	1.258	1	4.405526981	0
1811	Echinocactus setispinus				Cactaceae		7	US	1.180714286	0.954285714	0.730714286	1	0.431091501	0
1812	Shepherdia argentea				Elaeagnaceae		7	US	2.78	1.872727273	1.127272727	1	3.072889571	0
1813	Decodon verticillatus				Lythraceae		7	US	1.5	1	1	1	0.785398163	0
1814	Hippuris vulgaris				Haloragidaceae		7	US	2	1	1	1	1.047197551	0
1815	Myriophyllum spicatum				Haloragidaceae		7	US	1.470909091	0.579090909	0.471818182	1	0.210429137	0
1816	Proserpinaca palustris				Haloragidaceae		7	US	4	3	3	1	18.84955592	0
1817	Proserpinaca pectinata				Haloragidaceae		7	US	4	3	3	1	18.84955592	0
1818	Aralia hispida				Haloragidaceae		7	US	2.341428571	1.351428571	0.632857143	1	1.048523862	0
1819	Centella asiatica				Apiaceae		7	US	4	3	0.5	1	3.141592654	0
1820	Hydrocotyle umbellata				Apiaceae		7	US	1.274166667	0.958333333	0.185	1	0.118280509	0
1821	Daucus carota				Apiaceae		7	US	2.201333333	0.953333333	0.574666667	1	0.631459087	0
1822	Cornus canadensis				Cornaceae		7	US	2.347142857	1.057142857	0.907142857	1	1.178548639	0
1823	Cornus amomum				Cornaceae		7	US	4.351428571	2.614285714	0.96	1	5.718139735	0
1824	Cornus florida				Cornaceae		7	US	6.588	2.488	1.304	1	11.19129078	0
1825	Nyssa biflora				Cornaceae		7	US	7	5	3	1	54.97787144	0
1826	Gaultheria shallon				Ericaceae		7	US	0.898235294	0.539411765	0.243529412	1	0.061781802	0
1827	Arbutus menziesii				Ericaceae		7	US	3	1.5	1	1	2.35619449	0
1828	Arctostaphylos uva-ursi				Ericaceae		7	US	2.586666667	1.573333333	0.886666667	1	1.889383919	0
1829	Arctostaphylos andersonii				Ericaceae		7	US	3.058	1.422	1.068	1	2.431682966	0
1830	Arctostaphylos bicolor				Ericaceae		7	US	3.236	1.822	1.18	1	3.642818347	0
1831	Arbutus menziesii				Ericaceae		7	US	2.7	1.563333333	0.706666667	1	1.561811372	0
1832	Gaylussacia frondosa				Ericaceae		7	US	1.816666667	1.273333333	0.591111111	1	0.715953969	0
1833	Vaccinium angustifolium				Ericaceae		7	US	1.180769231	0.88	0.472307692	1	0.256963442	0
1834	Vaccinium macrocarpon				Ericaceae		7	US	1.836666667	1.044444444	1.044444444	1	1.049058374	0
1835	Bumelia lanuginosa				Sapotaceae		7	US	5.083333333	3.716666667	3.38	1	33.43624696	0
1836	Diospyros virginiana				Ebenaceae		7	US	15.19	9.44	2.1	1	157.6694981	0
1837	Fraxinus quadrangulata				Oleaceae		7	US	15.31	4.8	1.3	1	50.02169487	0
1838	Fraxinus excelsior				Oleaceae		7	US	16.18	5.3	1.5	1	67.3510341	0
1839	Forestiera angustifolia				Oleaceae		7	US	3.7975	2.05	2.03	1	8.274586567	0
1840	Ligustrum vulgare				Oleaceae		7	US	4.1275	2.86	1.5675	1	9.688561199	0
1841	Gelsemium sempervirens				Loganiaceae		7	US	9	4	0.5	1	9.424777961	0
1842	Asclepias humistrata				Asclepiadaceae		7	US	5.483333333	3.716666667	0.866666667	1	9.248024589	0
1843	Callicarpa americana				Verbenaceae		7	US	1.647	1.037	0.443	1	0.396163723	0
1844	Teucrium canadense				Lamiaceae		7	US	1.338461538	0.883076923	0.48	1	0.297060078	0
1845	Trichostema dichotomum				Lamiaceae		7	US	1.54	1.15	0.829	1	0.768726255	0
1846	Prunella vulgaris				Lamiaceae		7	US	2	1	0.5	1	0.523598776	0
1847	Lamium amplexicaule				Lamiaceae		7	US	2	1	0.5	1	0.523598776	0
1848	Solanum verbascifolium				Solanaceae		7	US	1.901333333	1.52	0.445333333	1	0.673884824	0
1849	Solanum dulcamara				Solanaceae		7	US	2.190666667	1.937333333	0.56	1	1.244420911	0
1850	Physalis heterophylla				Solanaceae		7	US	2.041333333	1.756	0.704	1	1.321325208	0
1851	Verbascum thapsus				Scrophulariaceae		7	US	0.6588	0.328	0.3248	1	0.036748708	0
1852	Linaria canadensis				Scrophulariaceae		7	US	0.547666667	0.344333333	0.215	1	0.021229143	0
1853	Penstemon barbatus				Scrophulariaceae		7	US	1.8	0.805555556	0.688888889	1	0.523016999	0
1854	Penstemon breviflorus				Scrophulariaceae		7	US	1.012666667	0.676	0.556666667	1	0.19952947	0
1855	Bacopa acuminata				Scrophulariaceae		7	US	0.509666667	0.213666667	0.213666667	1	0.012183117	0
1856	Veronica anagallis-aquatica				Scrophulariaceae		7	US	0.61	0.418	0.2456	1	0.032789372	0
1857	Castilleja indivisa				Scrophulariaceae		7	US	0.669130435	0.365652174	0.320869565	1	0.041106083	0
1858	Sesamum indicum				Pedaliaceae		7	US	3	2	1	1	3.141592654	0
1859	Plantago rhodosperma				Plantaginaceae		7	US	2.164	1.222666667	0.582666667	1	0.807205523	0
1860	Cephalanthus occidentalis				Rubiaceae		7	US	3.278	1.038	0.458	1	0.815962882	0
1861	Mitchella repens				Rubiaceae		7	US	3	2	1	1	3.141592654	0
1862	Diodia teres				Rubiaceae		7	US	2.576666667	1.916666667	0.886666667	1	2.292787648	0
1863	Galium bermudense				Rubiaceae		7	US	2.548333333	1.865	1.356666667	1	3.376034282	0
1864	Galium trifidum				Rubiaceae		7	US	1.183076923	1.183076923	1.183076923	1	0.867036882	0
1865	Galium latifolium				Rubiaceae		7	US	2.59	2.59	1.57	1	5.514394126	0
1866	Sambucus canadensis				Caprifoliaceae		7	US	2.994545455	1.494545455	0.78	1	1.827819317	0
1867	Symphoricarpos orbiculatus				Caprifoliaceae		7	US	2.573333333	1.525	0.886666667	1	1.8219015	0
1868	Lonicera dioica				Caprifoliaceae		7	US	3.655555556	2.297777778	0.92	1	4.04620482	0
1869	Viburnum dentatum				Caprifoliaceae		7	US	3.6	3	1.606666667	1	9.085485954	0
1870	Specularia biflora				Campanulaceae		7	US	0.470571429	0.386285714	0.177142857	1	0.016859957	0
1871	Silybum marianum				Asteraceae		7	US	7	3	2	1	21.99114858	0
1872	Cichorium intybus				Asteraceae		7	US	2	1	0.75	1	0.785398163	0
1873	Carica papaya	L.			Caricaceae		8	Cape Verde	4.6	2.5		3	7.043962649	0
1874	Carica papaya	L.			Caricaceae		8	Cape Verde	5.6	3.6		3	17.8048081	0
1875	Passiflora quadrangularis	L.			Passifloraceae		9	Cape Verde	8	6		3	71.10558267	0
1876	Passiflora edulis	Sims in Curtis			Passifloraceae		9	Cape Verde	6	4		3	23.56770097	0
1877	Andansonia digitada	L.			Bombacaceae		10	Cape Verde	1.3	0.9		2	0.328961352	0
1878	Ceiba pentandra	L.			Bombacaceae		10	Cape Verde	6	6	6	1	113.0973355	0
1879	Helianthemum gorgoneum	Webb in Hook			Cistaceae		11	Cape Verde	1	0.8		2	0.196202237	0
1880	Bombax pentandrum	L.		(= SVDS# 1878)			11							0
1881	Carex arcta	Boott			Cyperaceae		4	US	1.2	0.8		2	0.236832257	3
1882	Carex arcta	Boott			Cyperaceae		4	US	1.6	1.1		2	0.628978444	3
1883	Corchorus tridens	L.			Tiliaceae		12	Cape Verde	1.057142857	0.948571429		2	0.295791225	0
1884	Corchorus olitorius	L.			Tiliaceae		12	Cape Verde	1.966666667	1.44		2	1.448390714	0
1885	Corchorus depressus	L.			Tiliaceae		12	Cape Verde	1.43	0.866666667		2	0.335869791	0
1886	Corchorus trilocularis	L.			Tiliaceae		12	Cape Verde	1.403333333	0.713333333		2	0.219659881	0
1887	Diodia virginiana	L.			Rubiaceae	P	13	US	5.4	2.4		3	7.621242994	0
1888	Dipsacus fullonum	L.			Dipsacaceae	P	13	US	4.434782609	1.793478261		3	3.493468542	0
1889	Echinochloa colonum	L.			Poaceae	P	13	US	3	1.680327869		2	3.534350851	0
1890	Erigeron philadelphicus	L.			Asteraceae		13	US	0.89632107	0.341137124		2	0.031187724	0
1891	Echinodorus cordifolius	L.			Alismataceae	P	13	US	1.403100775	0.687338501		2	0.203428582	0
1892	Eclipta prostrata	L.			Asteraceae	P	13	US	2.771428571	1.114285714		2	1.191172608	0
1893	Eclipta prostrata	L.			Asteraceae	P	13	US	2.778571429	1.014285714		2	0.965970049	0
1894	Eleusine indica	L.			Poaceae	P	13	US	3.459016393	0.770491803		2	0.670553034	0
1895	Carex atherodes	Spreng.			Cyperaceae		4	US	2	1.2		2	0.974100789	3
1896	Eriochloa contractra	Hitchc.			Poaceae	P	13	US	4.827868852	1.475409836		3	2.573502569	0
1897	Eriochloa gracilis	(Fourn.) A.S. Hitchc.			Poaceae	P	13	US	3.316455696	1.240506329		2	1.886579053	0
1898	Eriochloa gracilis	(Fourn.) A.S. Hitchc.			Poaceae	P	13	US	4.303797468	1.246835443		2	2.623382224	0
1899	Eriochloa villosa	(Thunb.) Kunth			Poaceae	P	13	US	5.658536585	3.048780488		3	12.89564868	0
1900	Erysimum repandum	L.			Brassicaceae	P	13	US	1.356666667	0.733333333		2	0.224589903	0
1901	Eupatorium capillifolium	(Lam.) Small			Asteraceae	P	13	US	1.364238411	0.337748344		2	0.046643504	0
1902	Euphorbia cyathophora	Murr.			Euphorbiaceae	P	13	US	3.463414634	2.475609756		3	5.199372938	0
1903	Euphorbia cyathophora	Murr.			Euphorbiaceae	P	13	US	3.487804878	2.451219512		3	5.133283167	0
1904	Euphorbia dentata	Mitchx			Euphorbiaceae	P	13	US	2.947368421	2.294736842		3	3.801094577	0
1905	Euphorbia dentata	Mitchx			Euphorbiaceae	P	13	US	2.905263158	2.442105263		3	4.243713172	0
1906	Euphorbia esula	L.			Euphorbiaceae	P	13	US	2.427480916	1.519083969		2	2.110168551	0
1907	Euphorbia esula	L.			Euphorbiaceae	P	13	US	2.748091603	1.740458015		3	2.038327175	0
1908	Euphorbia heterophylla	L.			Euphorbiaceae	P	13	US	2.595744681	2.274468085		3	3.288540071	0
1909	Euphorbia heterophylla	L.			Euphorbiaceae	P	13	US	2.831914894	2.404255319		3	4.009228463	0
1910	Euphorbia humistrata	Engelm. ex Gray			Euphorbiaceae	P	13	US	1.024288107	0.628978224		2	0.122882573	0
1911	Euphorbia humistrata	Engelm. ex Gray			Euphorbiaceae	P	13	US	1.120603015	0.62479062		2	0.132852432	0
1912	Euphorbia hyssopifolia	L.			Euphorbiaceae	P	13	US	1.62631288	1.116086235		2	0.660729676	0
1913	Euphorbia maculata	L.			Euphorbiaceae	P	13	US	0.912751678	0.549217002		2	0.082985044	0
1914	Euphorbia maculata	L.			Euphorbiaceae	P	13	US	1.022371365	0.757829978		2	0.179562936	0
1915	Euphorbia marginata	Pursh			Euphorbiaceae	P	13	US	4.789297659	3.775919732		3	16.74967156	0
1916	Euphorbia marginata	Pursh			Euphorbiaceae	P	13	US	4.826086957	3.91638796		3	18.16056973	0
1917	Euphorbia nutans	Lag.			Euphorbiaceae	P	13	US	1.456658596	1.036803874		2	0.500530184	0
1918	Flaveria trinervia	(Spreng.) C. Mohr			Asteraceae	P	13	US	4.470588235	1.406649616		2	3.737864226	0
1919	Flaveria trinervia	(Spreng.) C. Mohr			Asteraceae	P	13	US	4.616368286	1.516624041		3	2.600168659	0
1920	Galium aparine	L.			Rubiaceae	P	13	US	2.113178295	1.68372093		2	2.289641568	0
1921	Galium aparine	L.			Rubiaceae	P	13	US	2.263565891	1.982945736		3	2.179404401	0
1922	Geranium carolinianum	L.			Geraniaceae	P	13	US	2.043814433	1.610824742		2	1.975349427	0
1923	Geranium carolinianum	L.			Geraniaceae	P	13	US	2.244845361	1.409793814		2	1.608821384	0
1924	Geranium dissectum	L.			Geraniaceae	P	13	US	2.088888889	1.582222222		2	1.942396325	0
1925	Geranium dissectum	L.			Geraniaceae	P	13	US	2.248888889	1.68		2	2.457919814	0
1926	Glaucium corniculatum	(L.) J.H. Rudolph			Papaveraceae	P	13	US	1.436170213	1.338297872		2	0.858817205	0
1927	Glaucium corniculatum	(L.) J.H. Rudolph			Papaveraceae	P	13	US	1.611702128	1.385106383		2	1.055102954	0
1928	Helianthus annuus	L.			Asteraceae	P	13	US	5.805774278	3.443569554		3	16.88783854	0
1929	Helianthus annuus	L.			Asteraceae	P	13	US	7.060367454	3.393700787		3	19.9540598	0
1930	Helianthus ciliaris	DC.			Asteraceae	P	13	US	3.654911839	1.869017632		3	3.126631096	0
1931	Helianthus ciliaris	DC.			Asteraceae	P	13	US	3.843828715	1.895465995		3	3.382068662	0
1932	Helianthus tuberosus	L.			Asteraceae	P	13	US	5.2075	2.52		3	8.103362825	0
1933	Helianthus tuberosus	L.			Asteraceae	P	13	US	6.7975	2.275		3	8.621328278	0
1934	Heteranthera limosa	(Sw.) Willd			Pontederiaceae	P	13	US	0.905060241	0.600481928		2	0.098599471	0
1935	Heteranthera limosa	(Sw.) Willd			Pontederiaceae	P	13	US	0.958554217	0.644337349		2	0.120640539	0
1936	Heteranthera reniformis	R. & P.			Pontederiaceae	P	13	US	0.929770992	0.566412214		2	0.09000529	0
1937	Heteranthera reniformis	R. & P.			Pontederiaceae	P	13	US	1.008396947	0.532824427		2	0.08633408	0
1938	Hibiscus trionum	L.			Malvaceae	P	13	US	2.301794454	2.146818923		3	2.597780434	0
1939	Hibiscus trionum	L.			Malvaceae	P	13	US	2.419249592	2.256117455		3	3.015582238	0
1940	Hoffmanseggia glauca	(Ortega) Eifert			Fabaceae	P	13	US	8.68	6.39		3	87.67630797	0
1941	Hoffmanseggia glauca	(Ortega) Eifert			Fabaceae	P	13	US	9.45	7.3		3	125.1239036	0
1942	Hypericum perforatum	L.			Clusiaceae	P	13	US	1.243243243	0.574324324		2	0.124384378	0
1943	Ipomoea coccinea	L.			Convolvulaceae	P	13	US	4.071428571	2.733766234		3	7.455390756	0
1944	Grindelia squarrosa	(Pursh) Dunal			Asteraceae	P	13	US	3.897163121	1.519503546		2	3.821611579	0
1945	Ipomoea hederacea	(L.) Jacq.			Convolvulaceae	P	13	US	5.114877589	3.47834275		3	15.17701889	0
1946	Erodium cicutarium	(L.) L�Her. ex Ait.			Geraniaceae	P	13	US	6.333333333	2.625730994		3	10.70297207	0
1947	Ipomoea lacunosa	L.	integriuscula Gray		Convolvulaceae	P	13	US	4.342857143	4.066666667		3	17.61924272	0
1948	Fagopyrum tataricum	(L.) Gaertn.			Polygonaceae	P	13	US	3.450980392	1.921568627		3	3.120519559	0
1949	Ipomoea pandurata	(L.) G.F.W.Meyer			Convolvulaceae	P	13	US	7.826271186	5.097457627		3	50.08276565	0
1950	Lactuca serriola	L.			Asteraceae	P	13	US	3.347663551	0.882242991		2	0.871207466	0
1951	Ipomoea purpurea	(L.) Roth			Convolvulaceae	P	13	US	3.975	2.553125		3	6.347809025	0
1952	Ipomoea quamoclit	L.			Convolvulaceae	P	13	US	5.479522184	2.83105802		3	10.76502579	0
1953	Ipomoea quamoclit	L.			Convolvulaceae	P	13	US	5.616040956	2.732081911		3	10.27464379	0
1954	Ipomoea trichocarpa	Ell.			Convolvulaceae	P	13	US	4.762048193	3.963855422		3	18.35703793	0
1955	Ipomoea turbinata	Lag.			Convolvulaceae	P	13	US	11.78947368	9.175438596		3	250.1424294	0
1956	Ipomoea turbinata	Lag.	trichocarpa		Convolvulaceae	P	13	US	11.31578947	8.374269006		3	198.8451289	0
1957	Ipomoea wrightii	Gray			Convolvulaceae	P	13	US	5.41898527	3.68903437		3	18.09267276	0
1958	Jacquemontia tamnifolia	(L.) Griseb			Convolvulaceae	P	13	US	3.097560976	1.931707317		3	2.830478427	0
1959	Kochia scoparia	(L.) Schrad			Chenopodiaceae	P	13	US	2.595628415	1.677595628		2	2.927663198	0
1960	Lactuca floridana	(L.) Gaertn.			Asteraceae	P	13	US	4.808278867	1.385620915		3	2.260506734	0
1961	Lamium amplexicaule	L.			Lamiaceae	P	13	US	2.43404908	1.164877301		2	1.136865357	0
1962	Fimbristylis miliacea	(L.) Vahl			Cyperaceae	P	13	US	0.5	0.5		2	0.037410779	0
1963	Lamium purpureum	L.			Lamiaceae	P	13	US	1.871657754	1.299465241		2	1.08150546	0
1964	Lepidium virginicum	L.			Brassicaceae	P	13	US	2.16056338	1.153521127		2	0.972156965	0
1965	Lithospermum arvense	L.			Boraginaceae	P	13	US	3.326495726	2.606837607		3	5.537514006	0
1966	Galinsoga ciliata	(Raf.) Blake			Lamiaceae	P	13	US	1.658461538	0.574615385		2	0.167158914	0
1967	Lonicera japonica	Thunb.			Caprifoliaceae	P	13	US	2.842639594	1.812182741		3	2.285885199	0
1968	Lonicera japonica	Thunb.			Caprifoliaceae	P	13	US	2.670050761	2.14213198		3	3.000393778	0
1969	Malva neglecta	Wallr.			Malvaceae	P	13	US	1.93625498	1.93625498		3	1.777417602	0
1970	Matricaria matricarioides	(Less.) C. L. Porter			Asteraceae	P	13	US	1.562363239	0.639679066		2	0.195982051	0
1971	Matricaria matricarioides	(Less.) C. L. Porter			Asteraceae	P	13	US	1.81619256	0.67833698		2	0.258510539	0
1972	Melochia corchorifolia	L.			Sterculiaceae	P	13	US	2.706984668	2.057921635		3	2.807369514	0
1973	Mollugo verticillata	L.			Aizoaceae	P	13	US	0.643261074	0.565504241		2	0.061801377	0
1974	Nicandra physalodes	(L.) Gaertn.			Solanaceae	P	13	US	1.966202783	1.731610338		3	1.443486995	0
1975	Nicandra physalodes	(L.) Gaertn.			Solanaceae	P	13	US	2.023856859	2.001988072		3	1.986166265	0
1976	Oenothera biennis	L.			Onagraceae	P	13	US	1.598648649	1.077027027		2	0.600333015	0
1977	Oenothera biennis	L.			Onagraceae	P	13	US	1.986486486	1.316216216		2	1.191307985	0
1978	Oenothera laciniata	Hill			Onagraceae	P	13	US	1.973809524	0.967857143		2	0.598425897	0
1979	Onopordum acanthium	L.			Asteraceae	P	13	US	4.882758621	2.520689655		3	7.601731971	0
1980	Oxalis stricta	L.			Oxalidaceae	P	13	US	1.200828157	0.832298137		2	0.257268926	0
1981	Oxalis stricta	L.			Oxalidaceae	P	13	US	1.332298137	0.92805383		2	0.360012051	0
1982	Panicum capillare	L.			Poaceae	P	13	US	1.838302752	1.104357798		2	0.738093016	0
1983	Panicum fasciculatum	Sw.			Poaceae	P	13	US	3.395799677	1.520193861		2	3.205372277	0
1984	Panicum miliaceum	L.			Poaceae	P	13	US	2.963963964	1.997747748		3	2.896776892	0
1985	Panicum miliaceum	L.			Poaceae	P	13	US	3.236486486	1.953358209		3	3.024162495	0
1986	Panicum texanum	Buckl.			Poaceae	P	13	US	5.905008636	2.395509499		3	8.303511329	0
1987	Paspalum dilatatum	Poir.			Poaceae	P	13	US	3.252272727	2.045454545		3	3.332348408	0
1988	Paspalum notatum	Fluegge			Poaceae	P	13	US	3.011647255	1.582362729		2	3.047317046	0
1989	Paspalum notatum	Fluegge			Poaceae	P	13	US	3.231281198	1.84359401		3	2.689398951	0
1990	Paspalum urvillei	Steud.			Poaceae	P	13	US	2.480587618	1.298006296		2	1.490338701	0
1991	Passiflora incarnata	L.			Passifloraceae	P	13	US	7.757475083	5.019933555		3	48.13283428	0
1992	Passiflora incarnata	L.			Passifloraceae	P	13	US	8.099667774	4.849112426		3	46.8869755	0
1993	Phyllanthus urinaria	L.			Euphorbiaceae	P	13	US	1.521575985	1.157598499		2	0.665397555	0
1994	Physalis angulata	L.			Solanaceae	P	13	US	1.859797297	1.614864865		2	1.775451876	0
1995	Physalis angulata	L.			Solanaceae	P	13	US	2.202702703	1.711148649		3	1.579147667	0
1996	Physalis heterophylla	Nees			Solanaceae	P	13	US	1.741251326	1.376458112		2	1.135373381	0
1997	Phytolacca americana	L.			Phytolaccaceae	P	13	US	3.2215478	2.974203338		3	6.982031921	0
1998	Phytolacca americana	L.			Phytolaccaceae	P	13	US	3.259484067	3.018209408		3	7.275099803	0
1999	Plantago lanceolata	L.			Plantaginaceae	P	13	US	3.361471861	1.567099567		2	3.419339874	0
[truncated: 22,422 more rows]
